# Supplementary material
Source: ML conference proceedings conference paper supplement (https://openreview.net/forum?id=f7O3hITh5s)
Supplement: supplementary_material [file attachment]

## Sheet: validation_set_ibm
api_name	group_id	candidate	input_text	gen_tokens_mean	input_tokens_mean (itm)	hf	hf_memo
Resource Controller	1	I want to retrieve the details of a specific resource key using the Resource Controller API. Could you please guide me on how to get the resource key's credentials and creator information by providing its URL-encoded CRN or GUID?	Functionality: Get resource key Description: View the details of a resource key by URL-encoded CRN or GUID, like the credentials for the key and who created it. Endpoint: get_resource_key API: Resource Controller	0	-2.02466	G
Resource Controller	1	I want to retrieve the details of a specific resource key, including its associated credentials and creator, using the Resource Controller API. Could you help me with that by demonstrating how to make a request to get the resource key with the given CRN or GUID?	Functionality: Get resource key Description: View the details of a resource key by URL-encoded CRN or GUID, like the credentials for the key and who created it. Endpoint: get_resource_key API: Resource Controller	0	-2.01237	G
Resource Controller	1	I want to retrieve the specific details of a resource key, such as its credentials and creator information, using the Resource Controller API.	Functionality: Get resource key Description: View the details of a resource key by URL-encoded CRN or GUID, like the credentials for the key and who created it. Endpoint: get_resource_key API: Resource Controller	0	-2.12376	G
Resource Controller	1	I want to retrieve the details of a resource key using the Resource Controller API.	Functionality: Get resource key Description: View the details of a resource key by URL-encoded CRN or GUID, like the credentials for the key and who created it. Endpoint: get_resource_key API: Resource Controller	0	-2.27565	G
Resource Controller	1	I want to retrieve the details of a specific resource key using the Resource Controller API.	Functionality: Get resource key Description: View the details of a resource key by URL-encoded CRN or GUID, like the credentials for the key and who created it. Endpoint: get_resource_key API: Resource Controller	0	-2.37018	G
Resource Controller	2	I'd like to retrieve a list of all resource keys using the Resource Controller API.	Functionality: Get a list of all of the resource keys. Description: View all of the resource keys that exist for all of your resource instances. Endpoint: list_resource_keys API: Resource Controller	0	-2.28642	G
Resource Controller	2	I want to retrieve a list of all resource keys using the Resource Controller API.	Functionality: Get a list of all of the resource keys. Description: View all of the resource keys that exist for all of your resource instances. Endpoint: list_resource_keys API: Resource Controller	0	-2.29616	G
Resource Controller	2	I want to know how to retrieve a list of all resource keys using the Resource Controller API.	Functionality: Get a list of all of the resource keys. Description: View all of the resource keys that exist for all of your resource instances. Endpoint: list_resource_keys API: Resource Controller	0	-2.29281	G
Resource Controller	2	I'd like to retrieve a list of all resource keys under my account using the Resource Controller API.	Functionality: Get a list of all of the resource keys. Description: View all of the resource keys that exist for all of your resource instances. Endpoint: list_resource_keys API: Resource Controller	0	-2.40249	B	under my account
Resource Controller	2	I want to retrieve a list of all resource keys under my account using the Resource Controller API.	Functionality: Get a list of all of the resource keys. Description: View all of the resource keys that exist for all of your resource instances. Endpoint: list_resource_keys API: Resource Controller	0	-2.38671	B	under my account
Configurational Data	3	I'd like to register an endpoint for receiving Optimization result events using the Configurational Data API. How do I go about doing that?	Functionality: Registers the endpoint to the specified events Description: Registers the endpoint for the specified events. *Replace prefix.orderoptimizer.ibm.com with api.orderoptimizer.ibm.com in URL*. Endpoint: registerEndpointToEvent API: Configurational Data	0	-3.01404	G
Configurational Data	3	I'd like to register an endpoint to receive Optimization result events using the Configurational Data API. How do I proceed with the "registerEndpointToEvent" functionality?	Functionality: Registers the endpoint to the specified events Description: Registers the endpoint for the specified events. *Replace prefix.orderoptimizer.ibm.com with api.orderoptimizer.ibm.com in URL*. Endpoint: registerEndpointToEvent API: Configurational Data	0	-2.86895	B	Optimization
Configurational Data	3	I'd like to register my endpoint to receive optimization result events using the API for Configurational Data. How do I proceed with the `registerEndpointToEvent` call?	Functionality: Registers the endpoint to the specified events Description: Registers the endpoint for the specified events. *Replace prefix.orderoptimizer.ibm.com with api.orderoptimizer.ibm.com in URL*. Endpoint: registerEndpointToEvent API: Configurational Data	0	-2.85243	B	Optimization
Configurational Data	3	I want to register my endpoint to receive optimization result events using the Configurational Data API. How do I do that?	Functionality: Registers the endpoint to the specified events Description: Registers the endpoint for the specified events. *Replace prefix.orderoptimizer.ibm.com with api.orderoptimizer.ibm.com in URL*. Endpoint: registerEndpointToEvent API: Configurational Data	0	-3.00676	B	Optimization
Configurational Data	3	I'd like to register an endpoint for receiving Optimization Result events using the Configurational Data API. How do I do that?	Functionality: Registers the endpoint to the specified events Description: Registers the endpoint for the specified events. *Replace prefix.orderoptimizer.ibm.com with api.orderoptimizer.ibm.com in URL*. Endpoint: registerEndpointToEvent API: Configurational Data	0	-3.01837	B	Optimization
IBM Db2 on Cloud REST API	4	How do I retrieve the dependencies of a specific object using the IBM Db2 on Cloud REST API?	Functionality: Get the dependencies of the object Description: Get the dependencies of the object. Endpoint: getObjectDependency API: IBM Db2 on Cloud REST API	0	-1.50129	G
IBM Db2 on Cloud REST API	4	How do I retrieve the dependencies of a specific database object using the IBM Db2 on Cloud REST API?	Functionality: Get the dependencies of the object Description: Get the dependencies of the object. Endpoint: getObjectDependency API: IBM Db2 on Cloud REST API	0	-1.87623	B	Database
IBM Db2 on Cloud REST API	4	How do I retrieve the dependencies of a specific IBM Db2 on Cloud object using the REST API?	Functionality: Get the dependencies of the object Description: Get the dependencies of the object. Endpoint: getObjectDependency API: IBM Db2 on Cloud REST API	0	-1.531	G
IBM Db2 on Cloud REST API	4	How do I retrieve the dependencies of a specific database object using the IBM Db2 on Cloud REST API?	Functionality: Get the dependencies of the object Description: Get the dependencies of the object. Endpoint: getObjectDependency API: IBM Db2 on Cloud REST API	0	-1.87623	G
IBM Db2 on Cloud REST API	4	How do I retrieve the dependencies of a specific IBM Db2 on Cloud database object using the IBM Db2 on Cloud REST API?	Functionality: Get the dependencies of the object Description: Get the dependencies of the object. Endpoint: getObjectDependency API: IBM Db2 on Cloud REST API	0	-1.73023	B	Database
IBM Db2 on Cloud REST API	5	How do I create a new function template using the IBM Db2 on Cloud REST API?	Functionality: Generate create function template Description: Endpoint: generateCreateFunctionTemplate API: IBM Db2 on Cloud REST API	0	-2.92857	G
IBM Db2 on Cloud REST API	5	How do I create a new function template using the IBM Db2 on Cloud REST API?	Functionality: Generate create function template Description: Endpoint: generateCreateFunctionTemplate API: IBM Db2 on Cloud REST API	0	-2.92857	G
IBM Db2 on Cloud REST API	5	How do I create a new function template using the IBM Db2 on Cloud REST API?	Functionality: Generate create function template Description: Endpoint: generateCreateFunctionTemplate API: IBM Db2 on Cloud REST API	0	-2.92857	G
IBM Db2 on Cloud REST API	5	How do I create a new function template using the IBM Db2 on Cloud REST API?	Functionality: Generate create function template Description: Endpoint: generateCreateFunctionTemplate API: IBM Db2 on Cloud REST API	0	-2.92857	G
IBM Db2 on Cloud REST API	5	How do I create a new function template using the IBM Db2 on Cloud REST API?	Functionality: Generate create function template Description: Endpoint: generateCreateFunctionTemplate API: IBM Db2 on Cloud REST API	0	-2.92857	G
IBM Db2 on Cloud REST API	6	As a DB administrator, I would like to know the average number of statements executed per minute for a specific time frame using the IBM Db2 on Cloud REST API.	Functionality: Return the average number of statements executed every minutes for a specified time frame. **DB ADMIN ONLY** Description: Return the average number of statements executed every minutes for a specified time frame. Endpoint: GetStatementsRate API: IBM Db2 on Cloud REST API	0	-2.00606	G
IBM Db2 on Cloud REST API	6	As a DB administrator, I'd like to know the average number of statements executed per minute for a specific time frame using the IBM Db2 on Cloud REST API. Can you help me with that?	Functionality: Return the average number of statements executed every minutes for a specified time frame. **DB ADMIN ONLY** Description: Return the average number of statements executed every minutes for a specified time frame. Endpoint: GetStatementsRate API: IBM Db2 on Cloud REST API	0	-2.0601	G
IBM Db2 on Cloud REST API	6	As a DB administrator, I want to know the average number of statements executed per minute for a specific time frame using the IBM Db2 on Cloud REST API. Can you help me with that?	Functionality: Return the average number of statements executed every minutes for a specified time frame. **DB ADMIN ONLY** Description: Return the average number of statements executed every minutes for a specified time frame. Endpoint: GetStatementsRate API: IBM Db2 on Cloud REST API	0	-1.99882	G
IBM Db2 on Cloud REST API	6	As a DB administrator, I would like to know the average number of statements executed per minute for a specific time frame using the IBM Db2 on Cloud REST API.	Functionality: Return the average number of statements executed every minutes for a specified time frame. **DB ADMIN ONLY** Description: Return the average number of statements executed every minutes for a specified time frame. Endpoint: GetStatementsRate API: IBM Db2 on Cloud REST API	0	-2.00606	G
IBM Db2 on Cloud REST API	6	How do I get the average number of statements executed per minute for a specific time frame using the IBM Db2 on Cloud REST API?	Functionality: Return the average number of statements executed every minutes for a specified time frame. **DB ADMIN ONLY** Description: Return the average number of statements executed every minutes for a specified time frame. Endpoint: GetStatementsRate API: IBM Db2 on Cloud REST API	0	-2.19536	G
IBM Db2 on Cloud REST API	7	As a DB administrator, I'd like to know the maximum log usage percentage during a specific time frame using the IBM Db2 on Cloud REST API. Could you please help me with that?	Functionality: Return the maximum usage percentage of logs for a specified time frame. **DB ADMIN ONLY** Description: Return the maximum usage percentage of logs for a specified time frame. Endpoint: GetMaxLogSpace API: IBM Db2 on Cloud REST API	0	-2.30538	G
IBM Db2 on Cloud REST API	7	As a DB administrator, I would like to know the maximum log usage percentage during a specific time period using the IBM Db2 on Cloud REST API. Can you help me with that?	Functionality: Return the maximum usage percentage of logs for a specified time frame. **DB ADMIN ONLY** Description: Return the maximum usage percentage of logs for a specified time frame. Endpoint: GetMaxLogSpace API: IBM Db2 on Cloud REST API	0	-2.29091	G
IBM Db2 on Cloud REST API	7	As a DB administrator, I need to find out the maximum log usage percentage for a specific time frame using the IBM Db2 on Cloud REST API. Can you help me with that?	Functionality: Return the maximum usage percentage of logs for a specified time frame. **DB ADMIN ONLY** Description: Return the maximum usage percentage of logs for a specified time frame. Endpoint: GetMaxLogSpace API: IBM Db2 on Cloud REST API	0	-2.17667	G
IBM Db2 on Cloud REST API	7	As a DB administrator, I need to find out the maximum log usage percentage for a specific time frame using the IBM Db2 on Cloud REST API. Could you please help me with that?	Functionality: Return the maximum usage percentage of logs for a specified time frame. **DB ADMIN ONLY** Description: Return the maximum usage percentage of logs for a specified time frame. Endpoint: GetMaxLogSpace API: IBM Db2 on Cloud REST API	0	-2.18673	G
IBM Db2 on Cloud REST API	7	As a DB administrator, I would like to know the maximum log usage percentage for a specific time frame using the IBM Db2 on Cloud REST API. Can you help me with that?	Functionality: Return the maximum usage percentage of logs for a specified time frame. **DB ADMIN ONLY** Description: Return the maximum usage percentage of logs for a specified time frame. Endpoint: GetMaxLogSpace API: IBM Db2 on Cloud REST API	0	-2.16321	G
IBM Db2 on Cloud REST API	8	As a DB administrator, I'd like to know the average CPU usage percentage for my IBM Db2 on Cloud instance during a specific time frame. How can I achieve this using the IBM Db2 on Cloud REST API?	Functionality: Return the percent of node CPU usage for a specified time frame. **DB ADMIN ONLY** Description: Return the percent of node CPU usage for a specified time frame. Endpoint: GetCPU API: IBM Db2 on Cloud REST API	0	-2.72805	B	average
IBM Db2 on Cloud REST API	8	As a DB administrator, I'd like to know the average CPU usage percentage for my IBM Db2 on Cloud instance during a specific time frame. How can I achieve this using the IBM Db2 on Cloud REST API?	Functionality: Return the percent of node CPU usage for a specified time frame. **DB ADMIN ONLY** Description: Return the percent of node CPU usage for a specified time frame. Endpoint: GetCPU API: IBM Db2 on Cloud REST API	0	-2.72805	B	average
IBM Db2 on Cloud REST API	8	As a DB administrator, I would like to know the CPU usage percentage for my IBM Db2 on Cloud instance during a specific time frame. How can I retrieve this information using the IBM Db2 on Cloud REST API?	Functionality: Return the percent of node CPU usage for a specified time frame. **DB ADMIN ONLY** Description: Return the percent of node CPU usage for a specified time frame. Endpoint: GetCPU API: IBM Db2 on Cloud REST API	0	-2.56151	G
IBM Db2 on Cloud REST API	8	As a DB administrator, I would like to know the CPU usage percentage for my IBM Db2 on Cloud database during a specific time frame. How can I retrieve this information using the IBM Db2 on Cloud REST API?	Functionality: Return the percent of node CPU usage for a specified time frame. **DB ADMIN ONLY** Description: Return the percent of node CPU usage for a specified time frame. Endpoint: GetCPU API: IBM Db2 on Cloud REST API	0	-2.51633	B	Database
IBM Db2 on Cloud REST API	8	As a DB administrator, I would like to know the CPU usage percentage for a specific time frame using the IBM Db2 on Cloud REST API. Could you please help me with that?	Functionality: Return the percent of node CPU usage for a specified time frame. **DB ADMIN ONLY** Description: Return the percent of node CPU usage for a specified time frame. Endpoint: GetCPU API: IBM Db2 on Cloud REST API	0	-2.50354	G
IBM Db2 on Cloud REST API	9	How do I retrieve the definition of an MQT table using the IBM Db2 on Cloud REST API?	Functionality: Get the definition of MQT table Description: Get the definition of MQT table. Endpoint: getMQTDefinition API: IBM Db2 on Cloud REST API	0	-1.66336	G
IBM Db2 on Cloud REST API	9	How do I retrieve the definition of an MQT table using the IBM Db2 on Cloud REST API?	Functionality: Get the definition of MQT table Description: Get the definition of MQT table. Endpoint: getMQTDefinition API: IBM Db2 on Cloud REST API	0	-1.66336	G
IBM Db2 on Cloud REST API	9	How do I retrieve the definition of an MQT table using the IBM Db2 on Cloud REST API?	Functionality: Get the definition of MQT table Description: Get the definition of MQT table. Endpoint: getMQTDefinition API: IBM Db2 on Cloud REST API	0	-1.66336	G
IBM Db2 on Cloud REST API	9	How do I retrieve the definition of an MQT table using the IBM Db2 on Cloud REST API?	Functionality: Get the definition of MQT table Description: Get the definition of MQT table. Endpoint: getMQTDefinition API: IBM Db2 on Cloud REST API	0	-1.66336	G
IBM Db2 on Cloud REST API	9	How do I retrieve the definition of an MQT table using the IBM Db2 on Cloud REST API?	Functionality: Get the definition of MQT table Description: Get the definition of MQT table. Endpoint: getMQTDefinition API: IBM Db2 on Cloud REST API	0	-1.66336	G
IBM Db2 on Cloud REST API	10	How do I check if there is an ongoing disaster recovery resync request with the IBM Db2 on Cloud REST API?	Functionality: Check current disaster recovery resync status Description: Check if there is an ongoing resync request Endpoint: resyncStatusDR API: IBM Db2 on Cloud REST API	0	-2.15066	G
IBM Db2 on Cloud REST API	10	How do I verify if there is an ongoing resync request with IBM Db2 on Cloud REST API?	Functionality: Check current disaster recovery resync status Description: Check if there is an ongoing resync request Endpoint: resyncStatusDR API: IBM Db2 on Cloud REST API	0	-2.52188	G
IBM Db2 on Cloud REST API	10	How do I check if there is an ongoing disaster recovery resync request with the IBM Db2 on Cloud REST API?	Functionality: Check current disaster recovery resync status Description: Check if there is an ongoing resync request Endpoint: resyncStatusDR API: IBM Db2 on Cloud REST API	0	-2.15066	G
IBM Db2 on Cloud REST API	10	How do I check if there is an ongoing disaster recovery resync request with the IBM Db2 on Cloud REST API?	Functionality: Check current disaster recovery resync status Description: Check if there is an ongoing resync request Endpoint: resyncStatusDR API: IBM Db2 on Cloud REST API	0	-2.15066	G
IBM Db2 on Cloud REST API	10	How do I check if there is an ongoing disaster recovery resync request with the IBM Db2 on Cloud REST API?	Functionality: Check current disaster recovery resync status Description: Check if there is an ongoing resync request Endpoint: resyncStatusDR API: IBM Db2 on Cloud REST API	0	-2.15066	G
IBM Db2 on Cloud REST API	11	As a DB administrator, I would like to know how to retrieve the histogram of response times for a specific time frame using the IBM Db2 on Cloud REST API.	Functionality: Return the histogram of response time for a specified time frame. **DB ADMIN ONLY** Description: Return the histogram of response time for a specified time frame. Endpoint: GetAllHistogramsDataByProfileName API: IBM Db2 on Cloud REST API	0	-2.21544	G
IBM Db2 on Cloud REST API	11	As a DB administrator, I'd like to know how to retrieve the histogram of response times for a specific time frame using the IBM Db2 on Cloud REST API.	Functionality: Return the histogram of response time for a specified time frame. **DB ADMIN ONLY** Description: Return the histogram of response time for a specified time frame. Endpoint: GetAllHistogramsDataByProfileName API: IBM Db2 on Cloud REST API	0	-2.28856	G
IBM Db2 on Cloud REST API	11	As a DB administrator, I'd like to know how to retrieve the response time histogram for a specific time frame using the IBM Db2 on Cloud REST API.	Functionality: Return the histogram of response time for a specified time frame. **DB ADMIN ONLY** Description: Return the histogram of response time for a specified time frame. Endpoint: GetAllHistogramsDataByProfileName API: IBM Db2 on Cloud REST API	0	-2.36689	G
IBM Db2 on Cloud REST API	11	As a DB administrator, I'd like to retrieve the response time histogram for a specific time frame using the IBM Db2 on Cloud REST API. Could you please guide me on how to do that?	Functionality: Return the histogram of response time for a specified time frame. **DB ADMIN ONLY** Description: Return the histogram of response time for a specified time frame. Endpoint: GetAllHistogramsDataByProfileName API: IBM Db2 on Cloud REST API	0	-2.3326	G
IBM Db2 on Cloud REST API	11	As a DB administrator, I would like to know how to retrieve the histogram of response times for a specific time frame using the IBM Db2 on Cloud REST API.	Functionality: Return the histogram of response time for a specified time frame. **DB ADMIN ONLY** Description: Return the histogram of response time for a specified time frame. Endpoint: GetAllHistogramsDataByProfileName API: IBM Db2 on Cloud REST API	0	-2.21544	G
IBM Db2 on Cloud REST API	12	How do I request a scaling of storage and CPU cores for my IBM Db2 on Cloud instance using the REST API?	Functionality: Create a scaling request Description: Scale the amount of storage and cpu cores for your instance. Endpoint: postScalingRequest API: IBM Db2 on Cloud REST API	0	-2.04977	G
IBM Db2 on Cloud REST API	12	How do I request a storage and CPU cores scale-up for my IBM Db2 on Cloud instance using the REST API?	Functionality: Create a scaling request Description: Scale the amount of storage and cpu cores for your instance. Endpoint: postScalingRequest API: IBM Db2 on Cloud REST API	0	-2.06595	G
IBM Db2 on Cloud REST API	12	How do I request a scaling of storage and CPU cores for my IBM Db2 on Cloud instance using the REST API?	Functionality: Create a scaling request Description: Scale the amount of storage and cpu cores for your instance. Endpoint: postScalingRequest API: IBM Db2 on Cloud REST API	0	-2.04977	G
IBM Db2 on Cloud REST API	12	How do I request a scaling of storage and CPU cores for my IBM Db2 on Cloud instance using the REST API?	Functionality: Create a scaling request Description: Scale the amount of storage and cpu cores for your instance. Endpoint: postScalingRequest API: IBM Db2 on Cloud REST API	0	-2.04977	G
IBM Db2 on Cloud REST API	12	How do I request a scaling of storage and CPU cores for my IBM Db2 on Cloud instance using the REST API?	Functionality: Create a scaling request Description: Scale the amount of storage and cpu cores for your instance. Endpoint: postScalingRequest API: IBM Db2 on Cloud REST API	0	-2.04977	G
IBM Db2 on Cloud REST API	13	How do I retrieve the detailed properties of a bufferpool using the IBM Db2 on Cloud REST API?	Functionality: Query bufferpool detail properties Description: Query bufferpool detail properties. Endpoint: getBufferPoolDetailProperties API: IBM Db2 on Cloud REST API	0	-1.96197	G
IBM Db2 on Cloud REST API	13	How do I retrieve the specific bufferpool detail properties using the IBM Db2 on Cloud REST API?	Functionality: Query bufferpool detail properties Description: Query bufferpool detail properties. Endpoint: getBufferPoolDetailProperties API: IBM Db2 on Cloud REST API	0	-1.71409	G
IBM Db2 on Cloud REST API	13	How do I retrieve the detailed properties of a bufferpool using the IBM Db2 on Cloud REST API?	Functionality: Query bufferpool detail properties Description: Query bufferpool detail properties. Endpoint: getBufferPoolDetailProperties API: IBM Db2 on Cloud REST API	0	-1.96197	G
IBM Db2 on Cloud REST API	13	How do I retrieve the detailed properties of a bufferpool using the IBM Db2 on Cloud REST API?	Functionality: Query bufferpool detail properties Description: Query bufferpool detail properties. Endpoint: getBufferPoolDetailProperties API: IBM Db2 on Cloud REST API	0	-1.96197	G
IBM Db2 on Cloud REST API	13	How do I retrieve the detailed properties of a bufferpool using the IBM Db2 on Cloud REST API?	Functionality: Query bufferpool detail properties Description: Query bufferpool detail properties. Endpoint: getBufferPoolDetailProperties API: IBM Db2 on Cloud REST API	0	-1.96197	G
IBM Db2 on Cloud REST API	14	How do I retrieve the current performance metrics for my schemas using the IBM Db2 on Cloud REST API?	Functionality: Returns performance metrics for schemas **DB ADMIN ONLY** Description: Returns current performance metrics for schemas. Endpoint: CurrentMonitorSchemasPerfFrontEnd API: IBM Db2 on Cloud REST API	0	-2.84578	G
IBM Db2 on Cloud REST API	14	How do I retrieve the current performance metrics for a specific schema using the IBM Db2 on Cloud REST API?	Functionality: Returns performance metrics for schemas **DB ADMIN ONLY** Description: Returns current performance metrics for schemas. Endpoint: CurrentMonitorSchemasPerfFrontEnd API: IBM Db2 on Cloud REST API	0	-3.13174	G
IBM Db2 on Cloud REST API	14	How do I retrieve the current performance metrics for my database schemas using the IBM Db2 on Cloud REST API?	Functionality: Returns performance metrics for schemas **DB ADMIN ONLY** Description: Returns current performance metrics for schemas. Endpoint: CurrentMonitorSchemasPerfFrontEnd API: IBM Db2 on Cloud REST API	0	-2.91864	G
IBM Db2 on Cloud REST API	14	How do I retrieve the current performance metrics for my schemas using the IBM Db2 on Cloud REST API?	Functionality: Returns performance metrics for schemas **DB ADMIN ONLY** Description: Returns current performance metrics for schemas. Endpoint: CurrentMonitorSchemasPerfFrontEnd API: IBM Db2 on Cloud REST API	0	-2.84578	G
IBM Db2 on Cloud REST API	14	How do I retrieve the current performance metrics for a specific schema using the IBM Db2 on Cloud REST API?	Functionality: Returns performance metrics for schemas **DB ADMIN ONLY** Description: Returns current performance metrics for schemas. Endpoint: CurrentMonitorSchemasPerfFrontEnd API: IBM Db2 on Cloud REST API	0	-3.13174	G
IBM Db2 on Cloud REST API	15	How do I generate Alias DDL using the IBM Db2 on Cloud REST API?	Functionality: Generate Alias DDL Description: Generate Alias DDL. Endpoint: generateAliasDDL API: IBM Db2 on Cloud REST API	0	-1.37006	G
IBM Db2 on Cloud REST API	15	How do I generate an Alias DDL statement using the IBM Db2 on Cloud REST API?	Functionality: Generate Alias DDL Description: Generate Alias DDL. Endpoint: generateAliasDDL API: IBM Db2 on Cloud REST API	0	-1.51179	G
IBM Db2 on Cloud REST API	15	Could you please provide an example of how to generate Alias DDL using the IBM Db2 on Cloud REST API?	Functionality: Generate Alias DDL Description: Generate Alias DDL. Endpoint: generateAliasDDL API: IBM Db2 on Cloud REST API	0	-1.36165	G
IBM Db2 on Cloud REST API	15	How do I create Alias DDL using the IBM Db2 on Cloud REST API?	Functionality: Generate Alias DDL Description: Generate Alias DDL. Endpoint: generateAliasDDL API: IBM Db2 on Cloud REST API	0	-1.66013	G
IBM Db2 on Cloud REST API	15	Could you please provide an example of how to generate Alias DDL using the IBM Db2 on Cloud REST API?	Functionality: Generate Alias DDL Description: Generate Alias DDL. Endpoint: generateAliasDDL API: IBM Db2 on Cloud REST API	0	-1.36165	G
IBM Db2 on Cloud REST API	16	How do I check the current allocated resources and view the supported scaling ranges with IBM Db2 on Cloud REST API?	Functionality: Get supported scaling ranges and current allocated resources Description: View the allocated storage and cpu size at the time of the request. This request will also return the supported scaling ranges for this Db2 on Cloud service. Endpoint: getResourcesInfo API: IBM Db2 on Cloud REST API	0	-2.33806	G
IBM Db2 on Cloud REST API	16	How can I check the current allocated resources and the supported scaling ranges for my IBM Db2 on Cloud service using the REST API?	Functionality: Get supported scaling ranges and current allocated resources Description: View the allocated storage and cpu size at the time of the request. This request will also return the supported scaling ranges for this Db2 on Cloud service. Endpoint: getResourcesInfo API: IBM Db2 on Cloud REST API	0	-2.25932	G
IBM Db2 on Cloud REST API	16	How do I check the current allocated resources and view the supported scaling ranges for my IBM Db2 on Cloud service using the REST API?	Functionality: Get supported scaling ranges and current allocated resources Description: View the allocated storage and cpu size at the time of the request. This request will also return the supported scaling ranges for this Db2 on Cloud service. Endpoint: getResourcesInfo API: IBM Db2 on Cloud REST API	0	-2.24312	G
IBM Db2 on Cloud REST API	16	How do I check the current allocated resources and view the supported scaling ranges using the IBM Db2 on Cloud REST API?	Functionality: Get supported scaling ranges and current allocated resources Description: View the allocated storage and cpu size at the time of the request. This request will also return the supported scaling ranges for this Db2 on Cloud service. Endpoint: getResourcesInfo API: IBM Db2 on Cloud REST API	0	-2.32617	G
IBM Db2 on Cloud REST API	16	How do I check the current allocated resources and view the supported scaling ranges with the IBM Db2 on Cloud REST API?	Functionality: Get supported scaling ranges and current allocated resources Description: View the allocated storage and cpu size at the time of the request. This request will also return the supported scaling ranges for this Db2 on Cloud service. Endpoint: getResourcesInfo API: IBM Db2 on Cloud REST API	0	-2.33994	G
IBM Db2 on Cloud REST API	17	How do I retrieve the SQL statement for granting or revoking a role using the IBM Db2 on Cloud REST API?	Functionality: Get SQL statement of grant or revoke role Description: Get SQL statement of grant or revoke role Endpoint: getChangeRolePrivilegeSQL API: IBM Db2 on Cloud REST API	0	-1.86339	B	misunderstood grant and revoke
IBM Db2 on Cloud REST API	17	How do I generate the SQL statement for granting or revoking a role using the IBM Db2 on Cloud REST API?	Functionality: Get SQL statement of grant or revoke role Description: Get SQL statement of grant or revoke role Endpoint: getChangeRolePrivilegeSQL API: IBM Db2 on Cloud REST API	0	-1.99552	B	misunderstood grant and revoke
IBM Db2 on Cloud REST API	17	How do I retrieve the SQL statement for granting or revoking a role using the IBM Db2 on Cloud REST API?	Functionality: Get SQL statement of grant or revoke role Description: Get SQL statement of grant or revoke role Endpoint: getChangeRolePrivilegeSQL API: IBM Db2 on Cloud REST API	0	-1.86339	B	misunderstood grant and revoke
IBM Db2 on Cloud REST API	17	How do I generate the SQL statement for granting or revoking a role using the IBM Db2 on Cloud REST API?	Functionality: Get SQL statement of grant or revoke role Description: Get SQL statement of grant or revoke role Endpoint: getChangeRolePrivilegeSQL API: IBM Db2 on Cloud REST API	0	-1.99552	B	misunderstood grant and revoke
IBM Db2 on Cloud REST API	17	How do I retrieve the SQL statement for granting or revoking a role using the IBM Db2 on Cloud REST API?	Functionality: Get SQL statement of grant or revoke role Description: Get SQL statement of grant or revoke role Endpoint: getChangeRolePrivilegeSQL API: IBM Db2 on Cloud REST API	0	-1.86339	B	misunderstood grant and revoke
IBM Db2 on Cloud REST API	18	How do I use the IBM Db2 on Cloud REST API to drop a view?	Functionality: Example request Description: Drop views. Endpoint: dropView API: IBM Db2 on Cloud REST API	0	-3.17171	G
IBM Db2 on Cloud REST API	18	How do I use the IBM Db2 on Cloud REST API to drop a specific view?	Functionality: Example request Description: Drop views. Endpoint: dropView API: IBM Db2 on Cloud REST API	0	-3.25713	G
IBM Db2 on Cloud REST API	18	How do I drop a view using the IBM Db2 on Cloud REST API?	Functionality: Example request Description: Drop views. Endpoint: dropView API: IBM Db2 on Cloud REST API	0	-3.14859	G
IBM Db2 on Cloud REST API	18	How do I use the IBM Db2 on Cloud REST API to drop a specific view?	Functionality: Example request Description: Drop views. Endpoint: dropView API: IBM Db2 on Cloud REST API	0	-3.25713	G
IBM Db2 on Cloud REST API	18	How do I use the IBM Db2 on Cloud REST API to drop a specific view?	Functionality: Example request Description: Drop views. Endpoint: dropView API: IBM Db2 on Cloud REST API	0	-3.25713	G
IBM Db2 on Cloud REST API	19	How do I retrieve the properties of a User Defined Function (UDF) using the IBM Db2 on Cloud REST API?	Functionality: Query UDF detail properties Description: Query UDF detail properties. Endpoint: getUDFDetailProperties API: IBM Db2 on Cloud REST API	0	-2.23495	G	UDF meaning is accurate
IBM Db2 on Cloud REST API	19	How do I retrieve the properties of a User Defined Function (UDF) using the IBM Db2 on Cloud REST API?	Functionality: Query UDF detail properties Description: Query UDF detail properties. Endpoint: getUDFDetailProperties API: IBM Db2 on Cloud REST API	0	-2.23495	G	UDF meaning is accurate
IBM Db2 on Cloud REST API	19	How do I retrieve the properties of a User-Defined Function (UDF) using the IBM Db2 on Cloud REST API?	Functionality: Query UDF detail properties Description: Query UDF detail properties. Endpoint: getUDFDetailProperties API: IBM Db2 on Cloud REST API	0	-2.2355	G	UDF meaning is accurate
IBM Db2 on Cloud REST API	19	How do I retrieve the properties of a User-Defined Function (UDF) using the IBM Db2 on Cloud REST API?	Functionality: Query UDF detail properties Description: Query UDF detail properties. Endpoint: getUDFDetailProperties API: IBM Db2 on Cloud REST API	0	-2.2355	G	UDF meaning is accurate
IBM Db2 on Cloud REST API	19	How do I retrieve the properties of a user-defined function (UDF) using the IBM Db2 on Cloud REST API?	Functionality: Query UDF detail properties Description: Query UDF detail properties. Endpoint: getUDFDetailProperties API: IBM Db2 on Cloud REST API	0	-2.24522	G	UDF meaning is accurate
App ID Management	20	I'd like to know how to retrieve the Cloud Directory IDP configuration using the App ID Management API.	Functionality: Get Cloud Directory IDP configuration Description: Returns the Cloud Directory identity provider configuration. [Learn more](https://cloud.ibm.com/docs/appid?topic=appid-cloud-directory). Endpoint: get_cloud_directory_idp API: App ID Management	0	-1.245	G
App ID Management	20	How do I retrieve the Cloud Directory identity provider configuration using the App ID Management API?	Functionality: Get Cloud Directory IDP configuration Description: Returns the Cloud Directory identity provider configuration. [Learn more](https://cloud.ibm.com/docs/appid?topic=appid-cloud-directory). Endpoint: get_cloud_directory_idp API: App ID Management	0	-1.19987	G
App ID Management	20	I'd like to know how to retrieve the Cloud Directory identity provider configuration using the App ID Management API.	Functionality: Get Cloud Directory IDP configuration Description: Returns the Cloud Directory identity provider configuration. [Learn more](https://cloud.ibm.com/docs/appid?topic=appid-cloud-directory). Endpoint: get_cloud_directory_idp API: App ID Management	0	-1.22888	G
App ID Management	20	How do I retrieve the Cloud Directory identity provider configuration using the App ID Management API?	Functionality: Get Cloud Directory IDP configuration Description: Returns the Cloud Directory identity provider configuration. [Learn more](https://cloud.ibm.com/docs/appid?topic=appid-cloud-directory). Endpoint: get_cloud_directory_idp API: App ID Management	0	-1.19987	G
App ID Management	20	How do I retrieve the Cloud Directory IDP configuration with the App ID Management API?	Functionality: Get Cloud Directory IDP configuration Description: Returns the Cloud Directory identity provider configuration. [Learn more](https://cloud.ibm.com/docs/appid?topic=appid-cloud-directory). Endpoint: get_cloud_directory_idp API: App ID Management	0	-1.21118	G
App ID Management	21	I'd like to know how to retrieve the advanced password management configuration with the App ID Management API.	Functionality: Get APM configuration Description: Get the configuration of the advanced password management. Endpoint: get_cloud_directory_advanced_password_management API: App ID Management	0	-2.69629	G
App ID Management	21	I'd like to know how to retrieve the advanced password management configuration using the App ID Management API.	Functionality: Get APM configuration Description: Get the configuration of the advanced password management. Endpoint: get_cloud_directory_advanced_password_management API: App ID Management	0	-2.72999	G
App ID Management	21	I'd like to know how to retrieve the advanced password management configuration with the App ID Management API.	Functionality: Get APM configuration Description: Get the configuration of the advanced password management. Endpoint: get_cloud_directory_advanced_password_management API: App ID Management	0	-2.69629	G
App ID Management	21	I'd like to know how to retrieve the advanced password management configuration using the App ID Management API.	Functionality: Get APM configuration Description: Get the configuration of the advanced password management. Endpoint: get_cloud_directory_advanced_password_management API: App ID Management	0	-2.72999	G
App ID Management	21	I'd like to know how to retrieve the configuration for the advanced password management with the App ID Management API.	Functionality: Get APM configuration Description: Get the configuration of the advanced password management. Endpoint: get_cloud_directory_advanced_password_management API: App ID Management	0	-2.51712	B	bad grammar: for the advanced…
App ID Management	22	I'd like to know how to update the texts of the App ID login widget using the App ID Management API. Could you help me with that?	Functionality: Update widget texts Description: Update the texts of the App ID login widget. [Learn more](https://cloud.ibm.com/docs/appid?topic=appid-login-widget). Endpoint: PostThemeText API: App ID Management	0	-1.60835	G
App ID Management	22	I'd like to know how to update the text in the App ID login widget using the App ID Management API.	Functionality: Update widget texts Description: Update the texts of the App ID login widget. [Learn more](https://cloud.ibm.com/docs/appid?topic=appid-login-widget). Endpoint: PostThemeText API: App ID Management	0	-1.75755	G
App ID Management	22	I'd like to know how to update the texts of the App ID login widget using the App ID Management API.	Functionality: Update widget texts Description: Update the texts of the App ID login widget. [Learn more](https://cloud.ibm.com/docs/appid?topic=appid-login-widget). Endpoint: PostThemeText API: App ID Management	0	-1.6196	G
App ID Management	22	I'd like to know how to update the text in the App ID login widget using the App ID Management API. Could you help me with that?	Functionality: Update widget texts Description: Update the texts of the App ID login widget. [Learn more](https://cloud.ibm.com/docs/appid?topic=appid-login-widget). Endpoint: PostThemeText API: App ID Management	0	-1.73905	G
App ID Management	22	I'd like to know how to update the text in the App ID login widget using the App ID Management API. Could you please help me with that?	Functionality: Update widget texts Description: Update the texts of the App ID login widget. [Learn more](https://cloud.ibm.com/docs/appid?topic=appid-login-widget). Endpoint: PostThemeText API: App ID Management	0	-1.73592	G
App ID Management	23	How do I get the sign up confirmation result for a user with the App ID Management API?	Functionality: Get signup confirmation result Description: Returns the sign up confirmation result. [Learn more](https://cloud.ibm.com/docs/appid?topic=appid-branded). Endpoint: userVerificationResult API: App ID Management	0	-1.74901	G	user is part of the endpint name
App ID Management	23	I need to know how to get the sign up confirmation result for a user with the App ID Management API.	Functionality: Get signup confirmation result Description: Returns the sign up confirmation result. [Learn more](https://cloud.ibm.com/docs/appid?topic=appid-branded). Endpoint: userVerificationResult API: App ID Management	0	-1.72462	G	user is part of the endpint name
App ID Management	23	I'd like to know how to get the signup confirmation result for a user with the App ID Management API.	Functionality: Get signup confirmation result Description: Returns the sign up confirmation result. [Learn more](https://cloud.ibm.com/docs/appid?topic=appid-branded). Endpoint: userVerificationResult API: App ID Management	0	-1.69012	G	user is part of the endpint name
App ID Management	23	I'd like to know how to get the signup confirmation result for a user with the App ID Management API.	Functionality: Get signup confirmation result Description: Returns the sign up confirmation result. [Learn more](https://cloud.ibm.com/docs/appid?topic=appid-branded). Endpoint: userVerificationResult API: App ID Management	0	-1.69012	G	user is part of the endpint name
App ID Management	23	I'd like to know how to obtain the sign-up confirmation result for a user with the App ID Management API.	Functionality: Get signup confirmation result Description: Returns the sign up confirmation result. [Learn more](https://cloud.ibm.com/docs/appid?topic=appid-branded). Endpoint: userVerificationResult API: App ID Management	0	-1.84162	G	user is part of the endpint name
App ID Management	24	I'd like to know how to update SAML IDP configuration for single sign-on experience using the App ID Management API.	Functionality: Update SAML IDP configuration Description: Configure SAML to set up a single sign-on experience for your users. [Learn more](https://cloud.ibm.com/docs/appid?topic=appid-enterprise). Endpoint: set_saml_idp API: App ID Management	0	-1.39066	G
App ID Management	24	I'd like to know how to update the SAML IDP configuration for single sign-on experience using the App ID Management API.	Functionality: Update SAML IDP configuration Description: Configure SAML to set up a single sign-on experience for your users. [Learn more](https://cloud.ibm.com/docs/appid?topic=appid-enterprise). Endpoint: set_saml_idp API: App ID Management	0	-1.38514	G
App ID Management	24	I need help updating the SAML IDP configuration for single sign-on using the App ID Management API.	Functionality: Update SAML IDP configuration Description: Configure SAML to set up a single sign-on experience for your users. [Learn more](https://cloud.ibm.com/docs/appid?topic=appid-enterprise). Endpoint: set_saml_idp API: App ID Management	0	-1.41264	G
App ID Management	24	I'd like to know how to update SAML IDP configuration for a single sign-on experience using the App ID Management API.	Functionality: Update SAML IDP configuration Description: Configure SAML to set up a single sign-on experience for your users. [Learn more](https://cloud.ibm.com/docs/appid?topic=appid-enterprise). Endpoint: set_saml_idp API: App ID Management	0	-1.38206	G
App ID Management	24	I'd like to know how to update SAML IDP configuration for setting up single sign-on using the App ID Management API.	Functionality: Update SAML IDP configuration Description: Configure SAML to set up a single sign-on experience for your users. [Learn more](https://cloud.ibm.com/docs/appid?topic=appid-enterprise). Endpoint: set_saml_idp API: App ID Management	0	-1.47638	G
App ID Management	25	How do I begin the sign up process using the App ID Management API?	Functionality: Sign up Description: Start the sign up process [Learn more](https://cloud.ibm.com/docs/appid?topic=appid-branded). Endpoint: startSignUp API: App ID Management	0	-1.72738	G
App ID Management	25	I'd like to initiate the sign-up process with the App ID Management API. How do I do that?	Functionality: Sign up Description: Start the sign up process [Learn more](https://cloud.ibm.com/docs/appid?topic=appid-branded). Endpoint: startSignUp API: App ID Management	0	-1.8592	G
App ID Management	25	I'd like to sign up for a new account using the App ID Management API. Could you help me get started with that process?	Functionality: Sign up Description: Start the sign up process [Learn more](https://cloud.ibm.com/docs/appid?topic=appid-branded). Endpoint: startSignUp API: App ID Management	0	-1.97504	B	new account is not in the input data
App ID Management	25	I'd like to start the sign up process using the App ID Management API. Could you guide me through that?	Functionality: Sign up Description: Start the sign up process [Learn more](https://cloud.ibm.com/docs/appid?topic=appid-branded). Endpoint: startSignUp API: App ID Management	0	-1.70579	G
App ID Management	25	I'd like to sign up for a new account using the App ID Management API. Could you please help me initiate the sign-up process?	Functionality: Sign up Description: Start the sign up process [Learn more](https://cloud.ibm.com/docs/appid?topic=appid-branded). Endpoint: startSignUp API: App ID Management	0	-1.81971	B	new account is not in the input data
App ID Management	26	I'd like to know how to update the list of redirect URIs for an App ID authentication flow using the App ID Management API.	Functionality: Update redirect URIs Description: Update the list of the redirect URIs that can be used as callbacks of App ID authentication flow. [Learn more](https://cloud.ibm.com/docs/appid?topic=appid-managing-idp#add-redirect-uri). Endpoint: updateRedirectUris API: App ID Management	0	-1.27284	G
App ID Management	26	I'd like to know how to update the list of redirect URIs for an App ID authentication flow with the App ID Management API.	Functionality: Update redirect URIs Description: Update the list of the redirect URIs that can be used as callbacks of App ID authentication flow. [Learn more](https://cloud.ibm.com/docs/appid?topic=appid-managing-idp#add-redirect-uri). Endpoint: updateRedirectUris API: App ID Management	0	-1.26785	G
App ID Management	26	How do I update the list of redirect URIs for an App ID authentication flow using the App ID Management API?	Functionality: Update redirect URIs Description: Update the list of the redirect URIs that can be used as callbacks of App ID authentication flow. [Learn more](https://cloud.ibm.com/docs/appid?topic=appid-managing-idp#add-redirect-uri). Endpoint: updateRedirectUris API: App ID Management	0	-1.23317	G
App ID Management	26	I'd like to know how to update the list of redirect URIs for an App ID authentication flow using the App ID Management API.	Functionality: Update redirect URIs Description: Update the list of the redirect URIs that can be used as callbacks of App ID authentication flow. [Learn more](https://cloud.ibm.com/docs/appid?topic=appid-managing-idp#add-redirect-uri). Endpoint: updateRedirectUris API: App ID Management	0	-1.27284	G
App ID Management	26	I'd like to know how to update the list of redirect URIs for an App ID authentication flow using the App ID Management API.	Functionality: Update redirect URIs Description: Update the list of the redirect URIs that can be used as callbacks of App ID authentication flow. [Learn more](https://cloud.ibm.com/docs/appid?topic=appid-managing-idp#add-redirect-uri). Endpoint: updateRedirectUris API: App ID Management	0	-1.27284	G
App ID Management	27	I'd like to add a new application scope to an existing registered application. How do I accomplish this using the App ID Management API?	Functionality: Add application scope Description: Update the scopes for a registered application. **Important:** Removing a scope from an array deletes it from any roles that it is associated with and the action cannot be undone. Endpoint: putApplicationsScopes API: App ID Management	0	-2.75626	G
App ID Management	27	I want to add a new application scope to an existing registered application. How do I accomplish this using the App ID Management API?	Functionality: Add application scope Description: Update the scopes for a registered application. **Important:** Removing a scope from an array deletes it from any roles that it is associated with and the action cannot be undone. Endpoint: putApplicationsScopes API: App ID Management	0	-2.71203	G
App ID Management	27	I'd like to add a new application scope to a registered application using the App ID Management API. Please guide me through the process.	Functionality: Add application scope Description: Update the scopes for a registered application. **Important:** Removing a scope from an array deletes it from any roles that it is associated with and the action cannot be undone. Endpoint: putApplicationsScopes API: App ID Management	0	-2.70615	G
App ID Management	27	I'd like to add a new application scope to an existing registered application using the App ID Management API. Could you help me out with that?	Functionality: Add application scope Description: Update the scopes for a registered application. **Important:** Removing a scope from an array deletes it from any roles that it is associated with and the action cannot be undone. Endpoint: putApplicationsScopes API: App ID Management	0	-2.74046	G
App ID Management	27	I'd like to add a new application scope for a registered app. Please help me with updating the scopes using the App ID Management API.	Functionality: Add application scope Description: Update the scopes for a registered application. **Important:** Removing a scope from an array deletes it from any roles that it is associated with and the action cannot be undone. Endpoint: putApplicationsScopes API: App ID Management	0	-2.67845	G
App ID Management	28	I'd like to delete a customized email template and revert back to the App ID default template using the App ID Management API. How can I achieve that?	Functionality: Delete an email template Description: Delete the customized email template and reverts to App ID default template. [Learn more](https://cloud.ibm.com/docs/appid?topic=appid-cd-users). Endpoint: deleteTemplate API: App ID Management	0	-1.34189	G
App ID Management	28	I'd like to delete a customized email template and revert back to the App ID default template using the App ID Management API. Could you please help me with that?	Functionality: Delete an email template Description: Delete the customized email template and reverts to App ID default template. [Learn more](https://cloud.ibm.com/docs/appid?topic=appid-cd-users). Endpoint: deleteTemplate API: App ID Management	0	-1.32276	G
App ID Management	28	I'd like to delete a customized email template and revert to the App ID default template using the App ID Management API. How can I do that?	Functionality: Delete an email template Description: Delete the customized email template and reverts to App ID default template. [Learn more](https://cloud.ibm.com/docs/appid?topic=appid-cd-users). Endpoint: deleteTemplate API: App ID Management	0	-1.30533	G
App ID Management	28	I'd like to delete a customized email template and revert back to the default template using the App ID Management API. How do I achieve that?	Functionality: Delete an email template Description: Delete the customized email template and reverts to App ID default template. [Learn more](https://cloud.ibm.com/docs/appid?topic=appid-cd-users). Endpoint: deleteTemplate API: App ID Management	0	-1.5057	G
App ID Management	28	I'd like to delete a customized email template and revert back to the default template using the App ID Management API. Could you help me with that?	Functionality: Delete an email template Description: Delete the customized email template and reverts to App ID default template. [Learn more](https://cloud.ibm.com/docs/appid?topic=appid-cd-users). Endpoint: deleteTemplate API: App ID Management	0	-1.49329	G
App ID Management	29	I need help deleting a specific Cloud Directory user and their associated profile with the App ID Management API. Please confirm before this action is irreversibly completed.	Functionality: Delete Cloud Directory user and profile Description: Deletes an existing Cloud Directory user and the profile related to it. [Learn more](https://cloud.ibm.com/docs/appid?topic=appid-cd-users). **Note: This action cannot be undone.** Endpoint: cloud_directory_remove API: App ID Management	0	-1.78743	B	We do not know if confirmation is possible and the instruction seems to be for an end-user, not for a developer
App ID Management	29	I'd like to delete a specific Cloud Directory user and their associated profile. Can you help me accomplish this using the App ID Management API?	Functionality: Delete Cloud Directory user and profile Description: Deletes an existing Cloud Directory user and the profile related to it. [Learn more](https://cloud.ibm.com/docs/appid?topic=appid-cd-users). **Note: This action cannot be undone.** Endpoint: cloud_directory_remove API: App ID Management	0	-1.96476	G
App ID Management	29	I need help deleting a specific Cloud Directory user and the associated profile using the App ID Management API. Please confirm this action before it is irreversibly completed.	Functionality: Delete Cloud Directory user and profile Description: Deletes an existing Cloud Directory user and the profile related to it. [Learn more](https://cloud.ibm.com/docs/appid?topic=appid-cd-users). **Note: This action cannot be undone.** Endpoint: cloud_directory_remove API: App ID Management	0	-1.73355	B	We do not know if confirmation is possible and the instruction seems to be for an end-user, not for a developer
App ID Management	29	I'd like to delete a specific Cloud Directory user and their associated profile using the App ID Management API. Could you please help me with that?	Functionality: Delete Cloud Directory user and profile Description: Deletes an existing Cloud Directory user and the profile related to it. [Learn more](https://cloud.ibm.com/docs/appid?topic=appid-cd-users). **Note: This action cannot be undone.** Endpoint: cloud_directory_remove API: App ID Management	0	-1.95565	G
App ID Management	29	I'd like to delete a specific Cloud Directory user and the associated profile using the App ID Management API. Please help me execute this action.	Functionality: Delete Cloud Directory user and profile Description: Deletes an existing Cloud Directory user and the profile related to it. [Learn more](https://cloud.ibm.com/docs/appid?topic=appid-cd-users). **Note: This action cannot be undone.** Endpoint: cloud_directory_remove API: App ID Management	0	-1.89856	G
IBM Event Streams REST Producer	30	I'd like to send a specific event message to IBM Event Streams. Could you please guide me through the process using the IBM Event Streams REST Producer API?	Functionality: Produce a message. Description: Produce the body of the request as a message in IBM Event Streams. Endpoint: produceMessage API: IBM Event Streams REST Producer	0	-1.48087	B	hallucination: instruction targes the the end-user, not a developer
IBM Event Streams REST Producer	30	I'd like to compose a message and send it through the IBM Event Streams REST Producer API. Could you please guide me through the step-by-step process for creating and sending a new message using this API?	Functionality: Produce a message. Description: Produce the body of the request as a message in IBM Event Streams. Endpoint: produceMessage API: IBM Event Streams REST Producer	0	-1.45864	B	hallucination: We do not know if the API can send the message.
IBM Event Streams REST Producer	30	I'd like to create a message body and send it using the IBM Event Streams REST Producer API. Can you guide me through the process?	Functionality: Produce a message. Description: Produce the body of the request as a message in IBM Event Streams. Endpoint: produceMessage API: IBM Event Streams REST Producer	0	-1.42614	B	hallucination: We do not know if the API can send the message.
IBM Event Streams REST Producer	30	I'd like to send a new message to IBM Event Streams. How do I format the request body to ensure it is correctly processed using the IBM Event Streams REST Producer API?	Functionality: Produce a message. Description: Produce the body of the request as a message in IBM Event Streams. Endpoint: produceMessage API: IBM Event Streams REST Producer	0	-1.56991	G	I'd like to send a new message to IBM Event Streams' refers to the App/system, not the REST API, so it's good. Also the instructions mentions the creation of the request body.
IBM Event Streams REST Producer	30	"Create a new message in IBM Event Streams using the REST Producer API." "How do I format and send a message body via the IBM Event Streams REST Producer API?" "Can you help me construct a message using the IBM Event Streams REST Producer?" "Use the IBM Event Streams REST Producer API to send a message with specific data." "What's the proper syntax for creating and sending a message through the I…	Functionality: Produce a message. Description: Produce the body of the request as a message in IBM Event Streams. Endpoint: produceMessage API: IBM Event Streams REST Producer	0	-1.49783	B	Too many instructions
Db2 Warehouse on Cloud v5 (AWS only)	31	As a DB administrator, I want to know the maximum log usage percentage during a specific time frame using Db2 Warehouse on Cloud v5. Can you help me achieve that?	Functionality: Return the maximum usage percentage of logs for a specified time frame. **DB ADMIN ONLY** Description: Return the maximum usage percentage of logs for a specified time frame. Endpoint: GetMaxLogSpace API: Db2 Warehouse on Cloud v5 (AWS only)	0	-1.35846	G
Db2 Warehouse on Cloud v5 (AWS only)	31	I need to find the maximum log usage percentage for a specific time period using Db2 Warehouse on Cloud v5.	Functionality: Return the maximum usage percentage of logs for a specified time frame. **DB ADMIN ONLY** Description: Return the maximum usage percentage of logs for a specified time frame. Endpoint: GetMaxLogSpace API: Db2 Warehouse on Cloud v5 (AWS only)	0	-1.44562	G	It does not specifically mention 'as admin', but a developer may do that omission too.
Db2 Warehouse on Cloud v5 (AWS only)	31	I need to find out the maximum log usage percentage within a specific time frame using Db2 Warehouse on Cloud v5.	Functionality: Return the maximum usage percentage of logs for a specified time frame. **DB ADMIN ONLY** Description: Return the maximum usage percentage of logs for a specified time frame. Endpoint: GetMaxLogSpace API: Db2 Warehouse on Cloud v5 (AWS only)	0	-1.40532	G	It does not specifically mention 'as admin', but a developer may do that omission too.
Db2 Warehouse on Cloud v5 (AWS only)	31	I need to find out the maximum log usage percentage within a certain time frame using Db2 Warehouse on Cloud v5. Could you help me with that?	Functionality: Return the maximum usage percentage of logs for a specified time frame. **DB ADMIN ONLY** Description: Return the maximum usage percentage of logs for a specified time frame. Endpoint: GetMaxLogSpace API: Db2 Warehouse on Cloud v5 (AWS only)	0	-1.38342	G	It does not specifically mention 'as admin', but a developer may do that omission too.
Db2 Warehouse on Cloud v5 (AWS only)	31	I need to find out the maximum log usage percentage within a specific time frame using Db2 Warehouse on Cloud v5. Could you please help me with that?	Functionality: Return the maximum usage percentage of logs for a specified time frame. **DB ADMIN ONLY** Description: Return the maximum usage percentage of logs for a specified time frame. Endpoint: GetMaxLogSpace API: Db2 Warehouse on Cloud v5 (AWS only)	0	-1.39718	G	It does not specifically mention 'as admin', but a developer may do that omission too.
Db2 Warehouse on Cloud v5 (AWS only)	32	I need to delete multiple remote servers using Db2 Warehouse on Cloud v5.	Functionality: Delete multiple remote servers Description: Delete multiple remote servers. Endpoint: DeleteRemoteServers API: Db2 Warehouse on Cloud v5 (AWS only)	0	-1.22169	G
Db2 Warehouse on Cloud v5 (AWS only)	32	I'd like to delete multiple remote servers using Db2 Warehouse on Cloud v5. Could you guide me through the process?	Functionality: Delete multiple remote servers Description: Delete multiple remote servers. Endpoint: DeleteRemoteServers API: Db2 Warehouse on Cloud v5 (AWS only)	0	-1.22056	G
Db2 Warehouse on Cloud v5 (AWS only)	32	I want to delete multiple remote servers using Db2 Warehouse on Cloud v5. Can you help me with that?	Functionality: Delete multiple remote servers Description: Delete multiple remote servers. Endpoint: DeleteRemoteServers API: Db2 Warehouse on Cloud v5 (AWS only)	0	-1.18873	G
Db2 Warehouse on Cloud v5 (AWS only)	32	I'd like to delete multiple remote servers in Db2 Warehouse on Cloud v5. How can I achieve that?	Functionality: Delete multiple remote servers Description: Delete multiple remote servers. Endpoint: DeleteRemoteServers API: Db2 Warehouse on Cloud v5 (AWS only)	0	-1.1988	B	Grammer error: 'in' isn't approapriate, it changes the meaning of the instruciton
Db2 Warehouse on Cloud v5 (AWS only)	32	I want to delete multiple remote servers using Db2 Warehouse on Cloud v5. Could you help me with that?	Functionality: Delete multiple remote servers Description: Delete multiple remote servers. Endpoint: DeleteRemoteServers API: Db2 Warehouse on Cloud v5 (AWS only)	0	-1.18798	G
Db2 Warehouse on Cloud v5 (AWS only)	33	I'd like to see the history of scaling actions performed on my Db2 Warehouse on Cloud v5 instance. Could you help me with that?	Functionality: View scaling history Description: View scaling historical data. Endpoint: getScalingHistory API: Db2 Warehouse on Cloud v5 (AWS only)	0	-1.63271	B	hallucination: we cannot know if the scaling history is associated to the instance
Db2 Warehouse on Cloud v5 (AWS only)	33	I'd like to check the scaling history for my Db2 Warehouse on Cloud v5 instance. How can I do that?	Functionality: View scaling history Description: View scaling historical data. Endpoint: getScalingHistory API: Db2 Warehouse on Cloud v5 (AWS only)	0	-1.64161	B	hallucination: we cannot know if the scaling history is associated to the instance
Db2 Warehouse on Cloud v5 (AWS only)	33	I'd like to check the scaling history for my Db2 Warehouse on Cloud v5 instance. Can you help me with that?	Functionality: View scaling history Description: View scaling historical data. Endpoint: getScalingHistory API: Db2 Warehouse on Cloud v5 (AWS only)	0	-1.64267	B	hallucination: we cannot know if the scaling history is associated to the instance
Db2 Warehouse on Cloud v5 (AWS only)	33	I'd like to see the historical data of scaling actions performed on my Db2 Warehouse on Cloud v5 instance. Could you help me with that?	Functionality: View scaling history Description: View scaling historical data. Endpoint: getScalingHistory API: Db2 Warehouse on Cloud v5 (AWS only)	0	-1.71231	B	hallucination: we cannot know if the scaling history is associated to the instance
Db2 Warehouse on Cloud v5 (AWS only)	33	I'd like to see the historical scaling data for my Db2 Warehouse on Cloud v5 instance. Can you help me retrieve that information?	Functionality: View scaling history Description: View scaling historical data. Endpoint: getScalingHistory API: Db2 Warehouse on Cloud v5 (AWS only)	0	-1.86129	B	hallucination: we cannot know if the scaling history is associated to the instance
Db2 Warehouse on Cloud v5 (AWS only)	34	I want to grant or revoke privileges for a specific role using Db2 Warehouse on Cloud v5.	Functionality: Grant or revoke the privilges of role Description: Grant or revoke the privilges of role Endpoint: modifyRolePrivilege API: Db2 Warehouse on Cloud v5 (AWS only)	0	-1.95034	G
Db2 Warehouse on Cloud v5 (AWS only)	34	I'd like to grant or revoke privileges for a specific role using Db2 Warehouse on Cloud v5. Could you please guide me on how to do that?	Functionality: Grant or revoke the privilges of role Description: Grant or revoke the privilges of role Endpoint: modifyRolePrivilege API: Db2 Warehouse on Cloud v5 (AWS only)	0	-1.91012	G
Db2 Warehouse on Cloud v5 (AWS only)	34	I want to grant/revoke privileges for a specific role using Db2 Warehouse on Cloud v5.	Functionality: Grant or revoke the privilges of role Description: Grant or revoke the privilges of role Endpoint: modifyRolePrivilege API: Db2 Warehouse on Cloud v5 (AWS only)	0	-1.95684	G	A developer would likely write grant/revoke
Db2 Warehouse on Cloud v5 (AWS only)	34	I want to grant or revoke privileges for a specific role using Db2 Warehouse on Cloud v5.	Functionality: Grant or revoke the privilges of role Description: Grant or revoke the privilges of role Endpoint: modifyRolePrivilege API: Db2 Warehouse on Cloud v5 (AWS only)	0	-1.95034	G
Db2 Warehouse on Cloud v5 (AWS only)	34	I want to grant or revoke privileges for a specific role using Db2 Warehouse on Cloud v5.	Functionality: Grant or revoke the privilges of role Description: Grant or revoke the privilges of role Endpoint: modifyRolePrivilege API: Db2 Warehouse on Cloud v5 (AWS only)	0	-1.95034	G
Db2 Warehouse on Cloud v5 (AWS only)	35	I'd like to generate the SQL statements for my workload using Db2 Warehouse on Cloud v5. Please help me achieve that.	Functionality: Generate workload DDL Description: Generate workload DDL. Endpoint: generateWorkloadDDL API: Db2 Warehouse on Cloud v5 (AWS only)	0	-1.68645	B	hallucination: statements?
Db2 Warehouse on Cloud v5 (AWS only)	35	I want to generate the SQL DDL statements for my workload using Db2 Warehouse on Cloud v5. Please help me with that.	Functionality: Generate workload DDL Description: Generate workload DDL. Endpoint: generateWorkloadDDL API: Db2 Warehouse on Cloud v5 (AWS only)	0	-1.67011	B	hallucination: statements?
Db2 Warehouse on Cloud v5 (AWS only)	35	I need to generate workload DDL using Db2 Warehouse on Cloud v5. Can you help me with that?	Functionality: Generate workload DDL Description: Generate workload DDL. Endpoint: generateWorkloadDDL API: Db2 Warehouse on Cloud v5 (AWS only)	0	-1.24007	G
Db2 Warehouse on Cloud v5 (AWS only)	35	I'd like to generate the SQL statements for my workload with Db2 Warehouse on Cloud v5. Could you please help me with that using the API?	Functionality: Generate workload DDL Description: Generate workload DDL. Endpoint: generateWorkloadDDL API: Db2 Warehouse on Cloud v5 (AWS only)	0	-1.6539	B	hallucination: statements?
Db2 Warehouse on Cloud v5 (AWS only)	35	I need to generate workload DDL using Db2 Warehouse on Cloud v5. Please help me with that.	Functionality: Generate workload DDL Description: Generate workload DDL. Endpoint: generateWorkloadDDL API: Db2 Warehouse on Cloud v5 (AWS only)	0	-1.23108	G
Db2 Warehouse on Cloud v5 (AWS only)	36	I want to delete multiple MQT tables using Db2 Warehouse on Cloud v5. How can I do that?	Functionality: Delete multiple mqt tables Description: Delete mutliple mqt tables. Endpoint: dropMQTs API: Db2 Warehouse on Cloud v5 (AWS only)	0	-1.97189	G
Db2 Warehouse on Cloud v5 (AWS only)	36	I want to delete multiple MQT tables in Db2 Warehouse on Cloud v5. How can I achieve that?	Functionality: Delete multiple mqt tables Description: Delete mutliple mqt tables. Endpoint: dropMQTs API: Db2 Warehouse on Cloud v5 (AWS only)	0	-1.96	G
Db2 Warehouse on Cloud v5 (AWS only)	36	I want to delete multiple MQT tables using Db2 Warehouse on Cloud v5. How do I do that?	Functionality: Delete multiple mqt tables Description: Delete mutliple mqt tables. Endpoint: dropMQTs API: Db2 Warehouse on Cloud v5 (AWS only)	0	-1.97176	G
Db2 Warehouse on Cloud v5 (AWS only)	36	I want to delete multiple MQT tables using Db2 Warehouse on Cloud v5. How can I achieve this?	Functionality: Delete multiple mqt tables Description: Delete mutliple mqt tables. Endpoint: dropMQTs API: Db2 Warehouse on Cloud v5 (AWS only)	0	-1.98591	G
Db2 Warehouse on Cloud v5 (AWS only)	36	I want to delete multiple mqt tables using Db2 Warehouse on Cloud v5. How can I achieve that?	Functionality: Delete multiple mqt tables Description: Delete mutliple mqt tables. Endpoint: dropMQTs API: Db2 Warehouse on Cloud v5 (AWS only)	0	-1.81454	G
Db2 Warehouse on Cloud v5 (AWS only)	37	I'd like to generate an SQL statement to grant or revoke multiple roles in Db2 Warehouse on Cloud v5. Please provide me with the statement using this API.	Functionality: Get the SQL statement for grant or revoke multiple roles Description: Get the SQL statement for grant or revoke multiple roles Endpoint: getChangeMutipleRolesPrivilegesSQL API: Db2 Warehouse on Cloud v5 (AWS only)	0	-1.91688	G
Db2 Warehouse on Cloud v5 (AWS only)	37	I'd like to generate an SQL statement to grant or revoke multiple roles in Db2 Warehouse on Cloud v5. Please provide me with the statement using the API.	Functionality: Get the SQL statement for grant or revoke multiple roles Description: Get the SQL statement for grant or revoke multiple roles Endpoint: getChangeMutipleRolesPrivilegesSQL API: Db2 Warehouse on Cloud v5 (AWS only)	0	-1.91384	G
Db2 Warehouse on Cloud v5 (AWS only)	37	I want to grant or revoke multiple roles for my database using Db2 Warehouse on Cloud v5. Please provide me with the SQL statement for this using the API.	Functionality: Get the SQL statement for grant or revoke multiple roles Description: Get the SQL statement for grant or revoke multiple roles Endpoint: getChangeMutipleRolesPrivilegesSQL API: Db2 Warehouse on Cloud v5 (AWS only)	0	-1.99274	G
Db2 Warehouse on Cloud v5 (AWS only)	37	I want to generate SQL statements to grant or revoke multiple roles for my Db2 Warehouse on Cloud v5 database. Please provide me with the statements using the API.	Functionality: Get the SQL statement for grant or revoke multiple roles Description: Get the SQL statement for grant or revoke multiple roles Endpoint: getChangeMutipleRolesPrivilegesSQL API: Db2 Warehouse on Cloud v5 (AWS only)	0	-2.05071	b	hallucination: database
Db2 Warehouse on Cloud v5 (AWS only)	37	I want to grant or revoke multiple roles for a database in Db2 Warehouse on Cloud v5. Can you provide me with the SQL statement for that?	Functionality: Get the SQL statement for grant or revoke multiple roles Description: Get the SQL statement for grant or revoke multiple roles Endpoint: getChangeMutipleRolesPrivilegesSQL API: Db2 Warehouse on Cloud v5 (AWS only)	0	-2.00805	B	hallucination: database
Db2 Warehouse on Cloud v5 (AWS only)	38	I'd like to retrieve the properties of a specific view in Db2 Warehouse on Cloud v5. How can I do that?	Functionality: Query view detail properties Description: Query view detail properties. Endpoint: getViewsDetailProperties API: Db2 Warehouse on Cloud v5 (AWS only)	0	-2.16025	G
Db2 Warehouse on Cloud v5 (AWS only)	38	I'd like to retrieve the properties of a specific view in Db2 Warehouse on Cloud v5. How can I do that?	Functionality: Query view detail properties Description: Query view detail properties. Endpoint: getViewsDetailProperties API: Db2 Warehouse on Cloud v5 (AWS only)	0	-2.16025	G
Db2 Warehouse on Cloud v5 (AWS only)	38	How do I retrieve the properties of a specific view in Db2 Warehouse on Cloud v5?	Functionality: Query view detail properties Description: Query view detail properties. Endpoint: getViewsDetailProperties API: Db2 Warehouse on Cloud v5 (AWS only)	0	-2.19665	G
Db2 Warehouse on Cloud v5 (AWS only)	38	I'd like to retrieve the properties of a specific view in Db2 Warehouse on Cloud v5. How can I accomplish that?	Functionality: Query view detail properties Description: Query view detail properties. Endpoint: getViewsDetailProperties API: Db2 Warehouse on Cloud v5 (AWS only)	0	-2.16265	G
Db2 Warehouse on Cloud v5 (AWS only)	38	I'd like to retrieve the properties of a specific view in Db2 Warehouse on Cloud v5. How can I do that?	Functionality: Query view detail properties Description: Query view detail properties. Endpoint: getViewsDetailProperties API: Db2 Warehouse on Cloud v5 (AWS only)	0	-2.16025	G
Db2 Warehouse on Cloud v5 (AWS only)	39	I'd like to retrieve the properties of a datalake table using Db2 Warehouse on Cloud v5. Can you help me with that?	Functionality: Get properties of datalake table Description: Get properties of datalake table Endpoint: getDatalakeTableProperties API: Db2 Warehouse on Cloud v5 (AWS only)	0	-1.36427	G
Db2 Warehouse on Cloud v5 (AWS only)	39	I'd like to retrieve the properties of a specific datalake table using Db2 Warehouse on Cloud v5. Could you please help me with that?	Functionality: Get properties of datalake table Description: Get properties of datalake table Endpoint: getDatalakeTableProperties API: Db2 Warehouse on Cloud v5 (AWS only)	0	-1.45265	G
Db2 Warehouse on Cloud v5 (AWS only)	39	How do I retrieve the properties of a specific datalake table using Db2 Warehouse on Cloud v5?	Functionality: Get properties of datalake table Description: Get properties of datalake table Endpoint: getDatalakeTableProperties API: Db2 Warehouse on Cloud v5 (AWS only)	0	-1.48752	G
Db2 Warehouse on Cloud v5 (AWS only)	39	I'd like to retrieve the properties of a specific datalake table using Db2 Warehouse on Cloud v5. Could you please help me with that?	Functionality: Get properties of datalake table Description: Get properties of datalake table Endpoint: getDatalakeTableProperties API: Db2 Warehouse on Cloud v5 (AWS only)	0	-1.45265	G
Db2 Warehouse on Cloud v5 (AWS only)	39	I'd like to retrieve the properties of a specific datalake table using Db2 Warehouse on Cloud v5. Could you help me with that?	Functionality: Get properties of datalake table Description: Get properties of datalake table Endpoint: getDatalakeTableProperties API: Db2 Warehouse on Cloud v5 (AWS only)	0	-1.44745	G
Db2 Warehouse on Cloud v5 (AWS only)	40	I want to retrieve the properties of a query alias using Db2 Warehouse on Cloud v5. Can you help me with that?	Functionality: Query alias detail properties Description: Query alias detail properties. Endpoint: getAliasDetailProperties API: Db2 Warehouse on Cloud v5 (AWS only)	0	-2.1809	B	grammar error: it is using query as a noun instead of as a verb
Db2 Warehouse on Cloud v5 (AWS only)	40	I'd like to retrieve the properties of a specific query alias using Db2 Warehouse on Cloud v5. Can you help me with that?	Functionality: Query alias detail properties Description: Query alias detail properties. Endpoint: getAliasDetailProperties API: Db2 Warehouse on Cloud v5 (AWS only)	0	-2.18702	B	grammar error: it is using query as a noun instead of as a verb
Db2 Warehouse on Cloud v5 (AWS only)	40	I'd like to retrieve the properties of a specific query alias in Db2 Warehouse on Cloud v5. How can I do that?	Functionality: Query alias detail properties Description: Query alias detail properties. Endpoint: getAliasDetailProperties API: Db2 Warehouse on Cloud v5 (AWS only)	0	-2.17452	B	grammar error: it is using query as a noun instead of as a verb
Db2 Warehouse on Cloud v5 (AWS only)	40	How do I retrieve the properties of a query alias using Db2 Warehouse on Cloud v5?	Functionality: Query alias detail properties Description: Query alias detail properties. Endpoint: getAliasDetailProperties API: Db2 Warehouse on Cloud v5 (AWS only)	0	-2.21493	B	grammar error: it is using query as a noun instead of as a verb
Db2 Warehouse on Cloud v5 (AWS only)	40	I'd like to retrieve the properties of a specific query alias using Db2 Warehouse on Cloud v5. How can I do that?	Functionality: Query alias detail properties Description: Query alias detail properties. Endpoint: getAliasDetailProperties API: Db2 Warehouse on Cloud v5 (AWS only)	0	-2.19169	B	grammar error: it is using query as a noun instead of as a verb
Db2 Warehouse on Cloud v5 (AWS only)	41	I need to find out the maximum log usage percentages for a specific time period using Db2 Warehouse on Cloud v5. Could you please help me with that?	Functionality: Return the maximum usage percentages of logs for a specified time frame. **DB ADMIN ONLY** Description: Return the maximum usage percentages of logs for a specified time frame. Endpoint: GetLogSpace API: Db2 Warehouse on Cloud v5 (AWS only)	0	-1.36185	G
Db2 Warehouse on Cloud v5 (AWS only)	41	I need to find the maximum log usage percentages for a specific time period using Db2 Warehouse on Cloud v5.	Functionality: Return the maximum usage percentages of logs for a specified time frame. **DB ADMIN ONLY** Description: Return the maximum usage percentages of logs for a specified time frame. Endpoint: GetLogSpace API: Db2 Warehouse on Cloud v5 (AWS only)	0	-1.38503	G
Db2 Warehouse on Cloud v5 (AWS only)	41	I need to find out the maximum log usage percentages for a specific time period using Db2 Warehouse on Cloud v5.	Functionality: Return the maximum usage percentages of logs for a specified time frame. **DB ADMIN ONLY** Description: Return the maximum usage percentages of logs for a specified time frame. Endpoint: GetLogSpace API: Db2 Warehouse on Cloud v5 (AWS only)	0	-1.37885	G
Db2 Warehouse on Cloud v5 (AWS only)	41	I need to find out the maximum log usage percentages for a specific time period using Db2 Warehouse on Cloud v5.	Functionality: Return the maximum usage percentages of logs for a specified time frame. **DB ADMIN ONLY** Description: Return the maximum usage percentages of logs for a specified time frame. Endpoint: GetLogSpace API: Db2 Warehouse on Cloud v5 (AWS only)	0	-1.37885	G
Db2 Warehouse on Cloud v5 (AWS only)	41	I need to find the maximum log usage percentages for a specific time period using Db2 Warehouse on Cloud v5.	Functionality: Return the maximum usage percentages of logs for a specified time frame. **DB ADMIN ONLY** Description: Return the maximum usage percentages of logs for a specified time frame. Endpoint: GetLogSpace API: Db2 Warehouse on Cloud v5 (AWS only)	0	-1.38503	G
Db2 Warehouse on Cloud v5 (AWS only)	42	I'd like to retrieve data from a table in Db2 Warehouse on Cloud v5 (AWS only) with a maximum of 100,000 rows. How can I do that using the API?	Functionality: Query table data Description: Fetches the table data up to a maximum of 100,000 rows. Currently it's not possible to retrieve data from tables that contain CLOB, BLOB or DBCLOB values. Endpoint: getTableData API: Db2 Warehouse on Cloud v5 (AWS only)	0	-1.70651	B	grammer error: it seems the table has only 100k rows.
Db2 Warehouse on Cloud v5 (AWS only)	42	I'd like to retrieve data from a table in Db2 Warehouse on Cloud v5 (AWS only) with a maximum of 100,000 rows. How can I do that using the API?	Functionality: Query table data Description: Fetches the table data up to a maximum of 100,000 rows. Currently it's not possible to retrieve data from tables that contain CLOB, BLOB or DBCLOB values. Endpoint: getTableData API: Db2 Warehouse on Cloud v5 (AWS only)	0	-1.70651	B	grammer error: it seems the table has only 100k rows.
Db2 Warehouse on Cloud v5 (AWS only)	42	I'd like to retrieve up to 100,000 rows of data from a table in Db2 Warehouse on Cloud v5. How do I use the API to achieve this?	Functionality: Query table data Description: Fetches the table data up to a maximum of 100,000 rows. Currently it's not possible to retrieve data from tables that contain CLOB, BLOB or DBCLOB values. Endpoint: getTableData API: Db2 Warehouse on Cloud v5 (AWS only)	0	-1.75085	G
Db2 Warehouse on Cloud v5 (AWS only)	42	I'd like to retrieve data from a specific table in Db2 Warehouse on Cloud v5, limited to a maximum of 100,000 rows. Please help me with that.	Functionality: Query table data Description: Fetches the table data up to a maximum of 100,000 rows. Currently it's not possible to retrieve data from tables that contain CLOB, BLOB or DBCLOB values. Endpoint: getTableData API: Db2 Warehouse on Cloud v5 (AWS only)	0	-1.75026	G
Db2 Warehouse on Cloud v5 (AWS only)	42	I'd like to retrieve up to 100,000 rows of data from a table using Db2 Warehouse on Cloud v5. How do I do that?	Functionality: Query table data Description: Fetches the table data up to a maximum of 100,000 rows. Currently it's not possible to retrieve data from tables that contain CLOB, BLOB or DBCLOB values. Endpoint: getTableData API: Db2 Warehouse on Cloud v5 (AWS only)	0	-1.76329	G
Db2 Warehouse on Cloud v5 (AWS only)	43	I'd like to see the current top consumer metrics for the last 20 periods in Db2 Warehouse on Cloud v5. Please provide me with this information.	Functionality: Returns a summary of the current top consumer metrics detail Description: Returns top consumer for 20 metrics, including their basic information, max value, avg value without max, and its rank. Endpoint: currentMonitorTopConsumer API: Db2 Warehouse on Cloud v5 (AWS only)	0	-3.02725	B	hallucination: 20 periods instead of metrics
Db2 Warehouse on Cloud v5 (AWS only)	43	I'd like to know which consumers are currently using the most resources in Db2 Warehouse on Cloud v5. Please provide me with this information.	Functionality: Returns a summary of the current top consumer metrics detail Description: Returns top consumer for 20 metrics, including their basic information, max value, avg value without max, and its rank. Endpoint: currentMonitorTopConsumer API: Db2 Warehouse on Cloud v5 (AWS only)	0	-3.34666	G
Db2 Warehouse on Cloud v5 (AWS only)	43	I'd like to get the current top consumer metrics summary for the 20 leading consumers using Db2 Warehouse on Cloud v5. Could you help me with that?	Functionality: Returns a summary of the current top consumer metrics detail Description: Returns top consumer for 20 metrics, including their basic information, max value, avg value without max, and its rank. Endpoint: currentMonitorTopConsumer API: Db2 Warehouse on Cloud v5 (AWS only)	0	-2.85326	B	hallucination: 20 consumers instead of metrics
Db2 Warehouse on Cloud v5 (AWS only)	43	I'd like to know which consumers are currently using the most resources in Db2 Warehouse on Cloud v5. Can you help me retrieve that information?	Functionality: Returns a summary of the current top consumer metrics detail Description: Returns top consumer for 20 metrics, including their basic information, max value, avg value without max, and its rank. Endpoint: currentMonitorTopConsumer API: Db2 Warehouse on Cloud v5 (AWS only)	0	-3.34193	G
Db2 Warehouse on Cloud v5 (AWS only)	43	I'd like to get the top consumer metrics summary for the last 20 consumers using Db2 Warehouse on Cloud v5.	Functionality: Returns a summary of the current top consumer metrics detail Description: Returns top consumer for 20 metrics, including their basic information, max value, avg value without max, and its rank. Endpoint: currentMonitorTopConsumer API: Db2 Warehouse on Cloud v5 (AWS only)	0	-3.04186	B	hallucination: 20 consumers instead of metrics
Db2 Warehouse on Cloud v5 (AWS only)	44	I need to get the average performance of a specific table across all members in Db2 Warehouse on Cloud v5. Please help me with that.	Functionality: Returns performance on all members for one table **DB ADMIN ONLY** Description: Returns performance on all members for one table. If there are multiple collections. They‚Äôll been aggregated averagely. Endpoint: MonitorTablePerfByMemberFrontEnd API: Db2 Warehouse on Cloud v5 (AWS only)	0	-1.84248	B	Average is for collections
Db2 Warehouse on Cloud v5 (AWS only)	44	I need to get the average performance statistics for a specific table across all members in Db2 Warehouse on Cloud v5.	Functionality: Returns performance on all members for one table **DB ADMIN ONLY** Description: Returns performance on all members for one table. If there are multiple collections. They‚Äôll been aggregated averagely. Endpoint: MonitorTablePerfByMemberFrontEnd API: Db2 Warehouse on Cloud v5 (AWS only)	0	-1.91646	B	Average is for collections
Db2 Warehouse on Cloud v5 (AWS only)	44	I need to get the average performance of a specific table across all members in Db2 Warehouse on Cloud v5. Please help me with that.	Functionality: Returns performance on all members for one table **DB ADMIN ONLY** Description: Returns performance on all members for one table. If there are multiple collections. They‚Äôll been aggregated averagely. Endpoint: MonitorTablePerfByMemberFrontEnd API: Db2 Warehouse on Cloud v5 (AWS only)	0	-1.84248	B	Average is for collections
Db2 Warehouse on Cloud v5 (AWS only)	44	I need to get the average performance statistics for a specific table across all members in Db2 Warehouse on Cloud v5.	Functionality: Returns performance on all members for one table **DB ADMIN ONLY** Description: Returns performance on all members for one table. If there are multiple collections. They‚Äôll been aggregated averagely. Endpoint: MonitorTablePerfByMemberFrontEnd API: Db2 Warehouse on Cloud v5 (AWS only)	0	-1.91646	B	Average is for collections
Db2 Warehouse on Cloud v5 (AWS only)	44	I need to obtain the average performance metrics for a specific table across all members in Db2 Warehouse on Cloud v5. Can you help me with that?	Functionality: Returns performance on all members for one table **DB ADMIN ONLY** Description: Returns performance on all members for one table. If there are multiple collections. They‚Äôll been aggregated averagely. Endpoint: MonitorTablePerfByMemberFrontEnd API: Db2 Warehouse on Cloud v5 (AWS only)	0	-1.85308	B	Average is for collections
Db2 Warehouse on Cloud v5 (AWS only)	45	I'd like to update a property for an existing external metadata store using Db2 Warehouse on Cloud v5. Please help me with that.	Functionality: Set the particular property of the exeternal metasore Description: Set / Update / Delete an additional property for an already registered exeternal metasore Endpoint: SetTheParticularProperty API: Db2 Warehouse on Cloud v5 (AWS only)	0	-2.8014	G
Db2 Warehouse on Cloud v5 (AWS only)	45	I'd like to update a specific property of my registered external metastore using Db2 Warehouse on Cloud v5. Could you help me with that?	Functionality: Set the particular property of the exeternal metasore Description: Set / Update / Delete an additional property for an already registered exeternal metasore Endpoint: SetTheParticularProperty API: Db2 Warehouse on Cloud v5 (AWS only)	0	-2.57461	G
Db2 Warehouse on Cloud v5 (AWS only)	45	I want to update a property of an existing external metadata store using Db2 Warehouse on Cloud v5. How can I do that?	Functionality: Set the particular property of the exeternal metasore Description: Set / Update / Delete an additional property for an already registered exeternal metasore Endpoint: SetTheParticularProperty API: Db2 Warehouse on Cloud v5 (AWS only)	0	-2.82454	G
Db2 Warehouse on Cloud v5 (AWS only)	45	I'd like to update a specific property of my external metadata store using Db2 Warehouse on Cloud v5. Could you please guide me on how to do that?	Functionality: Set the particular property of the exeternal metasore Description: Set / Update / Delete an additional property for an already registered exeternal metasore Endpoint: SetTheParticularProperty API: Db2 Warehouse on Cloud v5 (AWS only)	0	-2.75047	G
Db2 Warehouse on Cloud v5 (AWS only)	45	I'd like to update a specific property for an existing external metadata store using Db2 Warehouse on Cloud v5. How can I do that?	Functionality: Set the particular property of the exeternal metasore Description: Set / Update / Delete an additional property for an already registered exeternal metasore Endpoint: SetTheParticularProperty API: Db2 Warehouse on Cloud v5 (AWS only)	0	-2.78616	G
Db2 Warehouse on Cloud v5 (AWS only)	46	I'd like to check the current status and partial results of an ongoing SQL job with Db2 Warehouse on Cloud v5. Please help me with that using the FetchSQLResults API.	Functionality: Fetches partial results of a SQL job execution Description: Returns the current status of a SQL job execution along with any results of SQL statements that have already been executed. Clients are supposed to poll this endpoint until the status returned is either 'completed', which indicates all SQL statements have completed executing, or 'failed', which indicates the job failed to …	0	-1.75894	B	Wrong API name
Db2 Warehouse on Cloud v5 (AWS only)	46	I'd like to check the current status and any partial results of a SQL job execution with Db2 Warehouse on Cloud v5. Could you help me achieve that using the FetchSQLResults API?	Functionality: Fetches partial results of a SQL job execution Description: Returns the current status of a SQL job execution along with any results of SQL statements that have already been executed. Clients are supposed to poll this endpoint until the status returned is either 'completed', which indicates all SQL statements have completed executing, or 'failed', which indicates the job failed to …	0	-1.71651	B	Wrong API name
Db2 Warehouse on Cloud v5 (AWS only)	46	How do I check the current status and retrieve the partial results of a SQL job execution with Db2 Warehouse on Cloud v5?	Functionality: Fetches partial results of a SQL job execution Description: Returns the current status of a SQL job execution along with any results of SQL statements that have already been executed. Clients are supposed to poll this endpoint until the status returned is either 'completed', which indicates all SQL statements have completed executing, or 'failed', which indicates the job failed to …	0	-1.79785	G
Db2 Warehouse on Cloud v5 (AWS only)	46	I'd like to check the current status and partial results of a running SQL job with Db2 Warehouse on Cloud v5. Please help me do that using the FetchSQLResults API.	Functionality: Fetches partial results of a SQL job execution Description: Returns the current status of a SQL job execution along with any results of SQL statements that have already been executed. Clients are supposed to poll this endpoint until the status returned is either 'completed', which indicates all SQL statements have completed executing, or 'failed', which indicates the job failed to …	0	-1.74723	B	Wrong API name
Db2 Warehouse on Cloud v5 (AWS only)	46	I'd like to check the current status and partial results of a SQL job execution with Db2 Warehouse on Cloud v5. Could you help me with that using the FetchSQLResults API?	Functionality: Fetches partial results of a SQL job execution Description: Returns the current status of a SQL job execution along with any results of SQL statements that have already been executed. Clients are supposed to poll this endpoint until the status returned is either 'completed', which indicates all SQL statements have completed executing, or 'failed', which indicates the job failed to …	0	-1.719	B	Wrong API name
Db2 Warehouse on Cloud v5 (AWS only)	47	I'd like to get real-time information about active connections in my Db2 Warehouse on Cloud v5 instance. How can I achieve that?	Functionality: getConnectionSummaryRealTime Description: Endpoint: getConnectionSummaryRealTimeUsingGET API: Db2 Warehouse on Cloud v5 (AWS only)	0	-2.54224	B	hallucination: active connections is not in the input
Db2 Warehouse on Cloud v5 (AWS only)	47	I'd like to get real-time information about active connections to my Db2 Warehouse on Cloud v5 instance. Please help me with that using the provided API.	Functionality: getConnectionSummaryRealTime Description: Endpoint: getConnectionSummaryRealTimeUsingGET API: Db2 Warehouse on Cloud v5 (AWS only)	0	-2.49571	B	hallucination: active connections is not in the input
Db2 Warehouse on Cloud v5 (AWS only)	47	I'd like to get real-time information about active connections in my Db2 Warehouse on Cloud v5 instance. How can I achieve that?	Functionality: getConnectionSummaryRealTime Description: Endpoint: getConnectionSummaryRealTimeUsingGET API: Db2 Warehouse on Cloud v5 (AWS only)	0	-2.54224	B	hallucination: active connections is not in the input
Db2 Warehouse on Cloud v5 (AWS only)	47	I'd like to know the real-time connection summary for my Db2 Warehouse on Cloud v5 instance.	Functionality: getConnectionSummaryRealTime Description: Endpoint: getConnectionSummaryRealTimeUsingGET API: Db2 Warehouse on Cloud v5 (AWS only)	0	-2.30117	G
Db2 Warehouse on Cloud v5 (AWS only)	47	I'd like to view the real-time connection summary for my Db2 Warehouse on Cloud v5 instance. Can you help me with that?	Functionality: getConnectionSummaryRealTime Description: Endpoint: getConnectionSummaryRealTimeUsingGET API: Db2 Warehouse on Cloud v5 (AWS only)	0	-2.28728	G
Db2 Warehouse on Cloud v5 (AWS only)	48	I want to retrieve the list of authentications that correspond to a specific authid using Db2 Warehouse on Cloud v5.	Functionality: Get authentications through the authid filter Description: Get authentications through the authid filter Endpoint: getAuthenticationsByAuthidFilter API: Db2 Warehouse on Cloud v5 (AWS only)	0	-1.83529	G
Db2 Warehouse on Cloud v5 (AWS only)	48	I want to retrieve a list of authentications that match a specific authid using the Db2 Warehouse on Cloud v5 API.	Functionality: Get authentications through the authid filter Description: Get authentications through the authid filter Endpoint: getAuthenticationsByAuthidFilter API: Db2 Warehouse on Cloud v5 (AWS only)	0	-1.77495	G
Db2 Warehouse on Cloud v5 (AWS only)	48	I want to retrieve the authentications with a specific authid using Db2 Warehouse on Cloud v5. Could you help me with that?	Functionality: Get authentications through the authid filter Description: Get authentications through the authid filter Endpoint: getAuthenticationsByAuthidFilter API: Db2 Warehouse on Cloud v5 (AWS only)	0	-1.86806	G
Db2 Warehouse on Cloud v5 (AWS only)	48	I want to retrieve the authentications for a specific authid using Db2 Warehouse on Cloud v5. Could you help me with that?	Functionality: Get authentications through the authid filter Description: Get authentications through the authid filter Endpoint: getAuthenticationsByAuthidFilter API: Db2 Warehouse on Cloud v5 (AWS only)	0	-1.93758	G
Db2 Warehouse on Cloud v5 (AWS only)	48	I want to retrieve the authentications associated with a specific authid using Db2 Warehouse on Cloud v5. Can you help me with that?	Functionality: Get authentications through the authid filter Description: Get authentications through the authid filter Endpoint: getAuthenticationsByAuthidFilter API: Db2 Warehouse on Cloud v5 (AWS only)	0	-1.84453	G
Db2 Warehouse on Cloud v5 (AWS only)	49	I want to change the report history retention period with Db2 Warehouse on Cloud v5. Please help me update the report history keep count.	Functionality: Update the report history keep count Description: Update the report history keep count. Endpoint: SetReportHistoryKeepCount API: Db2 Warehouse on Cloud v5 (AWS only)	0	-1.36525	B	hallucination: retention period is not part of input
Db2 Warehouse on Cloud v5 (AWS only)	49	I'd like to update the report history keep count with Db2 Warehouse on Cloud v5. Could you please guide me through the process?	Functionality: Update the report history keep count Description: Update the report history keep count. Endpoint: SetReportHistoryKeepCount API: Db2 Warehouse on Cloud v5 (AWS only)	0	-1.19291	G
Db2 Warehouse on Cloud v5 (AWS only)	49	I want to update the report history keep count with Db2 Warehouse on Cloud v5. Could you please help me with that?	Functionality: Update the report history keep count Description: Update the report history keep count. Endpoint: SetReportHistoryKeepCount API: Db2 Warehouse on Cloud v5 (AWS only)	0	-1.18907	G
Db2 Warehouse on Cloud v5 (AWS only)	49	I'd like to update the report history keep count with Db2 Warehouse on Cloud v5. Could you please guide me through the process?	Functionality: Update the report history keep count Description: Update the report history keep count. Endpoint: SetReportHistoryKeepCount API: Db2 Warehouse on Cloud v5 (AWS only)	0	-1.19291	G
Db2 Warehouse on Cloud v5 (AWS only)	49	How do I change the report history retention period with Db2 Warehouse on Cloud v5?	Functionality: Update the report history keep count Description: Update the report history keep count. Endpoint: SetReportHistoryKeepCount API: Db2 Warehouse on Cloud v5 (AWS only)	0	-1.82408	B	hallucination: retention period is not part of input
Db2 Warehouse on Cloud v5 (AWS only)	50	I need to obtain the performance metrics for a specific schema using Db2 Warehouse on Cloud v5. Please help me with that.	Functionality: Returns performance metrics for one schema **DB ADMIN ONLY** Description: Returns performance metrics for one schema. If there are multiple collections. They‚Äôll been aggregated averagely. Endpoint: MonitorSchemaPerfFrontEnd API: Db2 Warehouse on Cloud v5 (AWS only)	0	-1.48808	G	minor omission: Admin info ommited
Db2 Warehouse on Cloud v5 (AWS only)	50	I need to obtain performance metrics for a specific schema using Db2 Warehouse on Cloud v5. Can you help me with that?	Functionality: Returns performance metrics for one schema **DB ADMIN ONLY** Description: Returns performance metrics for one schema. If there are multiple collections. They‚Äôll been aggregated averagely. Endpoint: MonitorSchemaPerfFrontEnd API: Db2 Warehouse on Cloud v5 (AWS only)	0	-1.47233	G	minor omission: Admin info ommited
Db2 Warehouse on Cloud v5 (AWS only)	50	I need to get the performance metrics for a specific schema using Db2 Warehouse on Cloud v5.	Functionality: Returns performance metrics for one schema **DB ADMIN ONLY** Description: Returns performance metrics for one schema. If there are multiple collections. They‚Äôll been aggregated averagely. Endpoint: MonitorSchemaPerfFrontEnd API: Db2 Warehouse on Cloud v5 (AWS only)	0	-1.48805	G	minor omission: Admin info ommited
Db2 Warehouse on Cloud v5 (AWS only)	50	I need to obtain the performance metrics for a specific schema in Db2 Warehouse on Cloud v5. How can I do that?	Functionality: Returns performance metrics for one schema **DB ADMIN ONLY** Description: Returns performance metrics for one schema. If there are multiple collections. They‚Äôll been aggregated averagely. Endpoint: MonitorSchemaPerfFrontEnd API: Db2 Warehouse on Cloud v5 (AWS only)	0	-1.48702	G	minor omission: Admin info ommited
Db2 Warehouse on Cloud v5 (AWS only)	50	I need to obtain the performance metrics for a specific schema in Db2 Warehouse on Cloud v5. How can I achieve this?	Functionality: Returns performance metrics for one schema **DB ADMIN ONLY** Description: Returns performance metrics for one schema. If there are multiple collections. They‚Äôll been aggregated averagely. Endpoint: MonitorSchemaPerfFrontEnd API: Db2 Warehouse on Cloud v5 (AWS only)	0	-1.49531	G	minor omission: Admin info ommited
Db2 Warehouse on Cloud v5 (AWS only)	51	I'd like to create an alias in Db2 Warehouse on Cloud v5. How do I do that using the API?	Functionality: Example request Description: Create alias. Endpoint: createAlias API: Db2 Warehouse on Cloud v5 (AWS only)	0	-1.78854	G
Db2 Warehouse on Cloud v5 (AWS only)	51	I'd like to create an alias for one of my tables with Db2 Warehouse on Cloud v5. Could you help me out?	Functionality: Example request Description: Create alias. Endpoint: createAlias API: Db2 Warehouse on Cloud v5 (AWS only)	0	-1.95646	B	hallucination: tables is not part of input
Db2 Warehouse on Cloud v5 (AWS only)	51	I want to create an alias for a table in Db2 Warehouse on Cloud v5. Could you help me with that?	Functionality: Example request Description: Create alias. Endpoint: createAlias API: Db2 Warehouse on Cloud v5 (AWS only)	0	-1.91347	B	hallucination: tables is not part of input
Db2 Warehouse on Cloud v5 (AWS only)	51	I want to create an alias in Db2 Warehouse on Cloud v5. Could you help me with that?	Functionality: Example request Description: Create alias. Endpoint: createAlias API: Db2 Warehouse on Cloud v5 (AWS only)	0	-1.76329	G
Db2 Warehouse on Cloud v5 (AWS only)	51	I want to create an alias for a table in Db2 Warehouse on Cloud v5. How do I do that?	Functionality: Example request Description: Create alias. Endpoint: createAlias API: Db2 Warehouse on Cloud v5 (AWS only)	0	-1.9558	B	hallucination: tables is not part of input
Db2 Warehouse on Cloud v5 (AWS only)	52	I'd like to retrieve the details of the most recent long-running query in my Db2 Warehouse on Cloud v5 instance. Can you help me do that?	Functionality: Returns a infight execution detail Description: Returns a infight execution detail. Only returns the last one between start and end Endpoint: getInflightExecutionDetial API: Db2 Warehouse on Cloud v5 (AWS only)	0	-2.87187	B	hallucination
Db2 Warehouse on Cloud v5 (AWS only)	52	I want to retrieve the details of the most recent in-flight execution with Db2 Warehouse on Cloud v5. How can I do that?	Functionality: Returns a infight execution detail Description: Returns a infight execution detail. Only returns the last one between start and end Endpoint: getInflightExecutionDetial API: Db2 Warehouse on Cloud v5 (AWS only)	0	-2.45618	G
Db2 Warehouse on Cloud v5 (AWS only)	52	I want to retrieve the details of the most recent long-running query in progress with Db2 Warehouse on Cloud v5. Could you help me with that?	Functionality: Returns a infight execution detail Description: Returns a infight execution detail. Only returns the last one between start and end Endpoint: getInflightExecutionDetial API: Db2 Warehouse on Cloud v5 (AWS only)	0	-2.83343	B	hallucination: long running query is not part of input
Db2 Warehouse on Cloud v5 (AWS only)	52	I want to retrieve the last infight execution detail with Db2 Warehouse on Cloud v5. Could you help me with that?	Functionality: Returns a infight execution detail Description: Returns a infight execution detail. Only returns the last one between start and end Endpoint: getInflightExecutionDetial API: Db2 Warehouse on Cloud v5 (AWS only)	0	-2.18554	G
Db2 Warehouse on Cloud v5 (AWS only)	52	How do I retrieve the details of the most recent long-running query in Db2 Warehouse on Cloud v5?	Functionality: Returns a infight execution detail Description: Returns a infight execution detail. Only returns the last one between start and end Endpoint: getInflightExecutionDetial API: Db2 Warehouse on Cloud v5 (AWS only)	0	-2.88653	B	hallucination: long running query is not part of input
Db2 Warehouse on Cloud v5 (AWS only)	53	I want to retrieve the data from a specific MQT table using Db2 Warehouse on Cloud v5. Can you help me with that?	Functionality: Get the data of specified mqt table Description: Get the data of specified mqt table. Endpoint: getMQTData API: Db2 Warehouse on Cloud v5 (AWS only)	0	-1.85476	G
Db2 Warehouse on Cloud v5 (AWS only)	53	I'd like to retrieve data from a specific MQT table using Db2 Warehouse on Cloud v5. Can you help me with that?	Functionality: Get the data of specified mqt table Description: Get the data of specified mqt table. Endpoint: getMQTData API: Db2 Warehouse on Cloud v5 (AWS only)	0	-1.84596	G
Db2 Warehouse on Cloud v5 (AWS only)	53	I'd like to retrieve data from a specific MQT table using Db2 Warehouse on Cloud v5. Could you help me with that?	Functionality: Get the data of specified mqt table Description: Get the data of specified mqt table. Endpoint: getMQTData API: Db2 Warehouse on Cloud v5 (AWS only)	0	-1.84801	G
Db2 Warehouse on Cloud v5 (AWS only)	53	I want to retrieve the data from a specific MQT table using Db2 Warehouse on Cloud v5. Can you help me with that?	Functionality: Get the data of specified mqt table Description: Get the data of specified mqt table. Endpoint: getMQTData API: Db2 Warehouse on Cloud v5 (AWS only)	0	-1.85476	G
Db2 Warehouse on Cloud v5 (AWS only)	53	I'd like to retrieve the data from a specific MQT table using Db2 Warehouse on Cloud v5. Please help me with that.	Functionality: Get the data of specified mqt table Description: Get the data of specified mqt table. Endpoint: getMQTData API: Db2 Warehouse on Cloud v5 (AWS only)	0	-1.85954	G
Db2 Warehouse on Cloud v5 (AWS only)	54	I'd like to know the storage utilization, both logical and physical, for each schema in my Db2 Warehouse on Cloud v5 instance. Please help me retrieve this information.	Functionality: Storage utilization by schema **DB ADMIN ONLY** Description: Returns a list where each element represents a schema and its corresponding logical and physical sizes. Physical size is the amount of storage in disk allocated to objects in the schema. Logical size is the actual object size, which might be less than the physical size (e.g. in the case of a logical table truncation). End…	0	-1.90757	G	minor omission: Admin info ommited
Db2 Warehouse on Cloud v5 (AWS only)	54	As a DB administrator, I want to know the storage utilization, both logical and physical, for each schema in Db2 Warehouse on Cloud v5. Please help me achieve this.	Functionality: Storage utilization by schema **DB ADMIN ONLY** Description: Returns a list where each element represents a schema and its corresponding logical and physical sizes. Physical size is the amount of storage in disk allocated to objects in the schema. Logical size is the actual object size, which might be less than the physical size (e.g. in the case of a logical table truncation). End…	0	-1.88548	G
Db2 Warehouse on Cloud v5 (AWS only)	54	As a DB administrator, I want to know the storage utilization for each schema in Db2 Warehouse on Cloud v5, please provide the details.	Functionality: Storage utilization by schema **DB ADMIN ONLY** Description: Returns a list where each element represents a schema and its corresponding logical and physical sizes. Physical size is the amount of storage in disk allocated to objects in the schema. Logical size is the actual object size, which might be less than the physical size (e.g. in the case of a logical table truncation). End…	0	-1.95325	G
Db2 Warehouse on Cloud v5 (AWS only)	54	I need to find out the logical and physical storage utilization by schema in Db2 Warehouse on Cloud v5. Please help me with that using the GetSchemaStorageUsage API.	Functionality: Storage utilization by schema **DB ADMIN ONLY** Description: Returns a list where each element represents a schema and its corresponding logical and physical sizes. Physical size is the amount of storage in disk allocated to objects in the schema. Logical size is the actual object size, which might be less than the physical size (e.g. in the case of a logical table truncation). End…	0	-1.89202	G	It's calling the endpoint API
Db2 Warehouse on Cloud v5 (AWS only)	54	As a DB administrator, I want to know the storage utilization for each schema in Db2 Warehouse on Cloud v5, including both logical and physical sizes. Could you please help me retrieve this information using the API?	Functionality: Storage utilization by schema **DB ADMIN ONLY** Description: Returns a list where each element represents a schema and its corresponding logical and physical sizes. Physical size is the amount of storage in disk allocated to objects in the schema. Logical size is the actual object size, which might be less than the physical size (e.g. in the case of a logical table truncation). End…	0	-1.87249	G
Db2 Warehouse on Cloud v5 (AWS only)	55	I'd like to know the detailed breakdown of the operating system time spent summary with Db2 Warehouse on Cloud v5.	Functionality: Returns a summary of the current operating system time spent Description: Returns multiple rows for the current os time spent summary. Each column is a category of the summary. Endpoint: currentMonitorThroughputOSTimeSpent API: Db2 Warehouse on Cloud v5 (AWS only)	0	-2.61483	G
Db2 Warehouse on Cloud v5 (AWS only)	55	I'd like to know the detailed breakdown of the operating system time spent summary for Db2 Warehouse on Cloud v5. Can you help me retrieve this information?	Functionality: Returns a summary of the current operating system time spent Description: Returns multiple rows for the current os time spent summary. Each column is a category of the summary. Endpoint: currentMonitorThroughputOSTimeSpent API: Db2 Warehouse on Cloud v5 (AWS only)	0	-2.62472	G
Db2 Warehouse on Cloud v5 (AWS only)	55	I'd like to know the detailed breakdown of the operating system time spent summary with Db2 Warehouse on Cloud v5.	Functionality: Returns a summary of the current operating system time spent Description: Returns multiple rows for the current os time spent summary. Each column is a category of the summary. Endpoint: currentMonitorThroughputOSTimeSpent API: Db2 Warehouse on Cloud v5 (AWS only)	0	-2.61483	G
Db2 Warehouse on Cloud v5 (AWS only)	55	How can I retrieve a detailed summary of the operating system time spent using Db2 Warehouse on Cloud v5?	Functionality: Returns a summary of the current operating system time spent Description: Returns multiple rows for the current os time spent summary. Each column is a category of the summary. Endpoint: currentMonitorThroughputOSTimeSpent API: Db2 Warehouse on Cloud v5 (AWS only)	0	-2.7325	G
Db2 Warehouse on Cloud v5 (AWS only)	55	How do I obtain a detailed breakdown of the operating system time usage with Db2 Warehouse on Cloud v5?	Functionality: Returns a summary of the current operating system time spent Description: Returns multiple rows for the current os time spent summary. Each column is a category of the summary. Endpoint: currentMonitorThroughputOSTimeSpent API: Db2 Warehouse on Cloud v5 (AWS only)	0	-2.94562	G
Db2 Warehouse on Cloud v5 (AWS only)	56	I want to know the current database member skew for a specific member using Db2 Warehouse on Cloud v5. Can you help me with that?	Functionality: Returns a current list of database member skew of specific member Description: Returns a list of database member skew of specific member. Endpoint: monitorDatabaseMemberSkewTimeseriesDeltaGet API: Db2 Warehouse on Cloud v5 (AWS only)	0	-2.14855	G
Db2 Warehouse on Cloud v5 (AWS only)	56	I'd like to know the current database member skew for a specific member using Db2 Warehouse on Cloud v5. Can you help me with that?	Functionality: Returns a current list of database member skew of specific member Description: Returns a list of database member skew of specific member. Endpoint: monitorDatabaseMemberSkewTimeseriesDeltaGet API: Db2 Warehouse on Cloud v5 (AWS only)	0	-2.15276	G
Db2 Warehouse on Cloud v5 (AWS only)	56	I'd like to know the current skew of a specific database member in Db2 Warehouse on Cloud v5. Can you help me with that?	Functionality: Returns a current list of database member skew of specific member Description: Returns a list of database member skew of specific member. Endpoint: monitorDatabaseMemberSkewTimeseriesDeltaGet API: Db2 Warehouse on Cloud v5 (AWS only)	0	-2.29465	G
Db2 Warehouse on Cloud v5 (AWS only)	56	I'd like to know the current skew of a specific database member using Db2 Warehouse on Cloud v5. Could you help me with that?	Functionality: Returns a current list of database member skew of specific member Description: Returns a list of database member skew of specific member. Endpoint: monitorDatabaseMemberSkewTimeseriesDeltaGet API: Db2 Warehouse on Cloud v5 (AWS only)	0	-2.30522	G
Db2 Warehouse on Cloud v5 (AWS only)	56	I want to know the current database member skew of a specific member in Db2 Warehouse on Cloud v5. Please help me with that.	Functionality: Returns a current list of database member skew of specific member Description: Returns a list of database member skew of specific member. Endpoint: monitorDatabaseMemberSkewTimeseriesDeltaGet API: Db2 Warehouse on Cloud v5 (AWS only)	0	-2.17003	G
Db2 Warehouse on Cloud v5 (AWS only)	57	I want to know the average number of statements executed per minute for a specific time period using Db2 Warehouse on Cloud v5. Can you help me with that?	Functionality: Return the average number of statements executed every minutes for a specified time frame. **DB ADMIN ONLY** Description: Return the average number of statements executed every minutes for a specified time frame. Endpoint: GetAVGStatementsRate API: Db2 Warehouse on Cloud v5 (AWS only)	0	-1.5285	G
Db2 Warehouse on Cloud v5 (AWS only)	57	I need to find the average number of statements executed per minute for a specific time period using Db2 Warehouse on Cloud v5. Could you please help me with that using the GetAVGStatementsRate API?	Functionality: Return the average number of statements executed every minutes for a specified time frame. **DB ADMIN ONLY** Description: Return the average number of statements executed every minutes for a specified time frame. Endpoint: GetAVGStatementsRate API: Db2 Warehouse on Cloud v5 (AWS only)	0	-1.23273	B	It's calling the endpoint API
Db2 Warehouse on Cloud v5 (AWS only)	57	I'd like to know the average number of statements executed per minute for a specific time period using Db2 Warehouse on Cloud v5. Could you help me with that?	Functionality: Return the average number of statements executed every minutes for a specified time frame. **DB ADMIN ONLY** Description: Return the average number of statements executed every minutes for a specified time frame. Endpoint: GetAVGStatementsRate API: Db2 Warehouse on Cloud v5 (AWS only)	0	-1.52374	G
Db2 Warehouse on Cloud v5 (AWS only)	57	I'd like to know the average number of statements executed per minute for a specific time period using Db2 Warehouse on Cloud v5. Can you help me achieve that?	Functionality: Return the average number of statements executed every minutes for a specified time frame. **DB ADMIN ONLY** Description: Return the average number of statements executed every minutes for a specified time frame. Endpoint: GetAVGStatementsRate API: Db2 Warehouse on Cloud v5 (AWS only)	0	-1.5351	G
Db2 Warehouse on Cloud v5 (AWS only)	57	I need to find the average number of statements executed per minute for a specific time period using Db2 Warehouse on Cloud v5. Can you help me with that?	Functionality: Return the average number of statements executed every minutes for a specified time frame. **DB ADMIN ONLY** Description: Return the average number of statements executed every minutes for a specified time frame. Endpoint: GetAVGStatementsRate API: Db2 Warehouse on Cloud v5 (AWS only)	0	-1.52588	G
Db2 Warehouse on Cloud v5 (AWS only)	58	I'd like to retrieve the data distribution property for a specific table in Db2 Warehouse on Cloud v5. How can I do that?	Functionality: Get data distributin property Description: Get data distributin property. Endpoint: getDataDistributionProperty API: Db2 Warehouse on Cloud v5 (AWS only)	0	-1.84334	B	hallucination: table is not part of input
Db2 Warehouse on Cloud v5 (AWS only)	58	How do I retrieve the data distribution property of a specific table using Db2 Warehouse on Cloud v5?	Functionality: Get data distributin property Description: Get data distributin property. Endpoint: getDataDistributionProperty API: Db2 Warehouse on Cloud v5 (AWS only)	0	-1.92893	B	hallucination: table is not part of input
Db2 Warehouse on Cloud v5 (AWS only)	58	I'd like to retrieve the data distribution property for a specific table in Db2 Warehouse on Cloud v5. Could you help me with that?	Functionality: Get data distributin property Description: Get data distributin property. Endpoint: getDataDistributionProperty API: Db2 Warehouse on Cloud v5 (AWS only)	0	-1.82352	B	hallucination: table is not part of input
Db2 Warehouse on Cloud v5 (AWS only)	58	How do I retrieve the data distribution property for a specific table using Db2 Warehouse on Cloud v5?	Functionality: Get data distributin property Description: Get data distributin property. Endpoint: getDataDistributionProperty API: Db2 Warehouse on Cloud v5 (AWS only)	0	-1.9282	B	hallucination: table is not part of input
Db2 Warehouse on Cloud v5 (AWS only)	58	How do I retrieve the data distribution property for a specific table in Db2 Warehouse on Cloud v5?	Functionality: Get data distributin property Description: Get data distributin property. Endpoint: getDataDistributionProperty API: Db2 Warehouse on Cloud v5 (AWS only)	0	-1.89407	B	hallucination: table is not part of input
Db2 Warehouse on Cloud v5 (AWS only)	59	I want to drop multiple User-defined Types using Db2 Warehouse on Cloud v5. How do I achieve that?	Functionality: Drop multiple User-defined Types Description: Drop multiple User-defined Types Endpoint: dropUDTs API: Db2 Warehouse on Cloud v5 (AWS only)	0	-1.26518	G
Db2 Warehouse on Cloud v5 (AWS only)	59	I want to drop multiple User-defined Types using Db2 Warehouse on Cloud v5. Could you help me with that?	Functionality: Drop multiple User-defined Types Description: Drop multiple User-defined Types Endpoint: dropUDTs API: Db2 Warehouse on Cloud v5 (AWS only)	0	-1.24425	G
Db2 Warehouse on Cloud v5 (AWS only)	59	I want to drop multiple User-defined Types using Db2 Warehouse on Cloud v5. Please help me with that.	Functionality: Drop multiple User-defined Types Description: Drop multiple User-defined Types Endpoint: dropUDTs API: Db2 Warehouse on Cloud v5 (AWS only)	0	-1.24317	G
Db2 Warehouse on Cloud v5 (AWS only)	59	I want to drop multiple User-defined Types in Db2 Warehouse on Cloud v5. How can I achieve this?	Functionality: Drop multiple User-defined Types Description: Drop multiple User-defined Types Endpoint: dropUDTs API: Db2 Warehouse on Cloud v5 (AWS only)	0	-1.26386	G
Db2 Warehouse on Cloud v5 (AWS only)	59	I want to drop multiple User-defined Types in Db2 Warehouse on Cloud v5. How can I accomplish this?	Functionality: Drop multiple User-defined Types Description: Drop multiple User-defined Types Endpoint: dropUDTs API: Db2 Warehouse on Cloud v5 (AWS only)	0	-1.26819	G
Db2 Warehouse on Cloud v5 (AWS only)	60	I'd like to retrieve visual explain nodes information with their corresponding ids and labels using Db2 Warehouse on Cloud v5. Could you please help me with that?	Functionality: Get visual explain nodes information Description: Get visual explain nodes including id and label information. Endpoint: GetVENodes API: Db2 Warehouse on Cloud v5 (AWS only)	0	-1.956	G
Db2 Warehouse on Cloud v5 (AWS only)	60	I'd like to retrieve the visual explain nodes information with their respective ids and labels using Db2 Warehouse on Cloud v5. Can you help me with that?	Functionality: Get visual explain nodes information Description: Get visual explain nodes including id and label information. Endpoint: GetVENodes API: Db2 Warehouse on Cloud v5 (AWS only)	0	-1.95107	G
Db2 Warehouse on Cloud v5 (AWS only)	60	I'd like to retrieve the visual explain nodes information with their corresponding ids and labels using Db2 Warehouse on Cloud v5. Could you please help me with that?	Functionality: Get visual explain nodes information Description: Get visual explain nodes including id and label information. Endpoint: GetVENodes API: Db2 Warehouse on Cloud v5 (AWS only)	0	-1.97978	G
Db2 Warehouse on Cloud v5 (AWS only)	60	I'd like to retrieve the visual explain nodes information, including their ids and labels. How can I do this using Db2 Warehouse on Cloud v5?	Functionality: Get visual explain nodes information Description: Get visual explain nodes including id and label information. Endpoint: GetVENodes API: Db2 Warehouse on Cloud v5 (AWS only)	0	-1.97725	G
Db2 Warehouse on Cloud v5 (AWS only)	60	I'd like to retrieve the visual explain nodes information using Db2 Warehouse on Cloud v5 API. Could you help me with that?	Functionality: Get visual explain nodes information Description: Get visual explain nodes including id and label information. Endpoint: GetVENodes API: Db2 Warehouse on Cloud v5 (AWS only)	0	-2.12773	G
Db2 Warehouse on Cloud v5 (AWS only)	61	I need to find the transactions currently blocking others in Db2 Warehouse on Cloud v5. How can I do that?	Functionality: Returns the blocking transactions. **DB ADMIN ONLY** Description: Returns the blocking transactions. Endpoint: BlockingTransactionsHolderDetail API: Db2 Warehouse on Cloud v5 (AWS only)	0	-1.86244	G	minor omission: Admin info ommited
Db2 Warehouse on Cloud v5 (AWS only)	61	I'm a DB administrator looking for information about blocking transactions in Db2 Warehouse on Cloud v5. Can you help me retrieve this data using the API?	Functionality: Returns the blocking transactions. **DB ADMIN ONLY** Description: Returns the blocking transactions. Endpoint: BlockingTransactionsHolderDetail API: Db2 Warehouse on Cloud v5 (AWS only)	0	-1.79817	G
Db2 Warehouse on Cloud v5 (AWS only)	61	As a DB administrator, I need to identify the transactions that are currently blocking other transactions in Db2 Warehouse on Cloud v5. Please help me retrieve this information using the API.	Functionality: Returns the blocking transactions. **DB ADMIN ONLY** Description: Returns the blocking transactions. Endpoint: BlockingTransactionsHolderDetail API: Db2 Warehouse on Cloud v5 (AWS only)	0	-1.84148	G
Db2 Warehouse on Cloud v5 (AWS only)	61	I need to find the transactions that are currently blocking others in the Db2 Warehouse on Cloud v5. How can I do that?	Functionality: Returns the blocking transactions. **DB ADMIN ONLY** Description: Returns the blocking transactions. Endpoint: BlockingTransactionsHolderDetail API: Db2 Warehouse on Cloud v5 (AWS only)	0	-1.86653	G
Db2 Warehouse on Cloud v5 (AWS only)	61	I need to find the transactions that are currently blocking other transactions in the Db2 Warehouse on Cloud v5. Please help me with that using the API.	Functionality: Returns the blocking transactions. **DB ADMIN ONLY** Description: Returns the blocking transactions. Endpoint: BlockingTransactionsHolderDetail API: Db2 Warehouse on Cloud v5 (AWS only)	0	-1.84922	G
Geocoding and Search API v7	62	How do I get the geo-coordinates and complete postal address of a specific address using the Geocoding and Search API v7?	Functionality: Geocode Description: This endpoint allows to find the geo-coordinates of a known address, place, locality or administrative area, even if the query is incomplete or partly incorrect. It also returns a complete postal address string and address details. It supports structured, unstructured and hybrid queries - combinations of structured and unstructured query elements. Endpoint: API…	0	-0.584911	G
Geocoding and Search API v7	62	In what format should I provide an example query to geocode a partial address using the Geocoding and Search API v7? Let's say I only have the city name and a part of the street name, how can I utilize the API to find the precise coordinates and complete address?	Functionality: Geocode Description: This endpoint allows to find the geo-coordinates of a known address, place, locality or administrative area, even if the query is incomplete or partly incorrect. It also returns a complete postal address string and address details. It supports structured, unstructured and hybrid queries - combinations of structured and unstructured query elements. Endpoint: API…	0	-0.600859	G
Geocoding and Search API v7	62	How can I use the Geocoding and Search API v7 to locate the precise coordinates and details of a given address or place, even if my query is incomplete?	Functionality: Geocode Description: This endpoint allows to find the geo-coordinates of a known address, place, locality or administrative area, even if the query is incomplete or partly incorrect. It also returns a complete postal address string and address details. It supports structured, unstructured and hybrid queries - combinations of structured and unstructured query elements. Endpoint: API…	0	-0.556915	G
Geocoding and Search API v7	62	How can I use the Geocoding and Search API v7 to precisely locate the geographical coordinates and obtain detailed address information for a given address or place, even when the query is incomplete or contains errors?	Functionality: Geocode Description: This endpoint allows to find the geo-coordinates of a known address, place, locality or administrative area, even if the query is incomplete or partly incorrect. It also returns a complete postal address string and address details. It supports structured, unstructured and hybrid queries - combinations of structured and unstructured query elements. Endpoint: API…	0	-0.605144	G
Geocoding and Search API v7	62	How do I get the geo-coordinates and complete address of a specific location using the Geocoding and Search API v7? For instance, if I only have the name of a street, how can I find its exact location and address details?	Functionality: Geocode Description: This endpoint allows to find the geo-coordinates of a known address, place, locality or administrative area, even if the query is incomplete or partly incorrect. It also returns a complete postal address string and address details. It supports structured, unstructured and hybrid queries - combinations of structured and unstructured query elements. Endpoint: API…	0	-0.609014	G
Virtual Private Cloud API	63	How do I view all the rules associated with a particular load balancer listener policy using the Virtual Private Cloud API?	Functionality: List all rules of a load balancer listener policy Description: This request lists all rules of a load balancer listener policy. Endpoint: list_load_balancer_listener_policy_rules API: Virtual Private Cloud API	0	-1.29655	G
Virtual Private Cloud API	63	I want to know how to view all the rules for a specific load balancer listener policy with the Virtual Private Cloud API.	Functionality: List all rules of a load balancer listener policy Description: This request lists all rules of a load balancer listener policy. Endpoint: list_load_balancer_listener_policy_rules API: Virtual Private Cloud API	0	-1.32974	G
Virtual Private Cloud API	63	How do I retrieve all the rules associated with a particular load balancer listener policy using the Virtual Private Cloud API?	Functionality: List all rules of a load balancer listener policy Description: This request lists all rules of a load balancer listener policy. Endpoint: list_load_balancer_listener_policy_rules API: Virtual Private Cloud API	0	-1.30861	G
Virtual Private Cloud API	63	How do I retrieve all the rules associated with a particular load balancer listener policy using the Virtual Private Cloud API?	Functionality: List all rules of a load balancer listener policy Description: This request lists all rules of a load balancer listener policy. Endpoint: list_load_balancer_listener_policy_rules API: Virtual Private Cloud API	0	-1.30861	G
Virtual Private Cloud API	63	How can I access the list of rules for a specific load balancer listener policy using the Virtual Private Cloud API?	Functionality: List all rules of a load balancer listener policy Description: This request lists all rules of a load balancer listener policy. Endpoint: list_load_balancer_listener_policy_rules API: Virtual Private Cloud API	0	-1.33364	G
Virtual Private Cloud API	64	How do I retrieve a list of all bare metal servers in the region using the Virtual Private Cloud API?	Functionality: List all bare metal servers Description: This request lists all bare metal servers in the region. Endpoint: list_bare_metal_servers API: Virtual Private Cloud API	0	-1.354	G
Virtual Private Cloud API	64	How do I retrieve a list of all bare metal servers in my region using the Virtual Private Cloud API?	Functionality: List all bare metal servers Description: This request lists all bare metal servers in the region. Endpoint: list_bare_metal_servers API: Virtual Private Cloud API	0	-1.39361	G
Virtual Private Cloud API	64	How do I retrieve a list of all bare metal servers in the region using the Virtual Private Cloud API?	Functionality: List all bare metal servers Description: This request lists all bare metal servers in the region. Endpoint: list_bare_metal_servers API: Virtual Private Cloud API	0	-1.354	G
Virtual Private Cloud API	64	Here's a possible user query utilizing the given API: "Help me list all the bare metal servers in my Virtual Private Cloud account using the Virtual Private Cloud API."	Functionality: List all bare metal servers Description: This request lists all bare metal servers in the region. Endpoint: list_bare_metal_servers API: Virtual Private Cloud API	0	-1.52806	B	Bad format: instruction is pre-pended by agent-like response 'Here's a possible user query utilizing the given API:'
Virtual Private Cloud API	64	Here's a possible user query that meets the requirements: "I'd like to know how to retrieve a list of all bare metal servers currently available in the region using the Virtual Private Cloud API."	Functionality: List all bare metal servers Description: This request lists all bare metal servers in the region. Endpoint: list_bare_metal_servers API: Virtual Private Cloud API	0	-1.44397	B	Bad format: instruction is pre-pended by agent-like response 'Here's a possible user query utilizing the given API:'
Virtual Private Cloud API	65	I'd like to delete a specific VPN client from my VPN server using the Virtual Private Cloud API. Can you help me craft a query for that?	Functionality: Delete a VPN client Description: This request disconnects and deletes the VPN client from the VPN server. The VPN client may reconnect unless its authentication permissions for the configured authentication methods (such as its client certificate) have been revoked. Endpoint: delete_vpn_server_client API: Virtual Private Cloud API	0	-2.11001	G
Virtual Private Cloud API	65	I'd like to remove a VPN client from the VPN server using the Virtual Private Cloud API. Could you please help me construct a query to do that effectively?	Functionality: Delete a VPN client Description: This request disconnects and deletes the VPN client from the VPN server. The VPN client may reconnect unless its authentication permissions for the configured authentication methods (such as its client certificate) have been revoked. Endpoint: delete_vpn_server_client API: Virtual Private Cloud API	0	-2.19393	B	hallucination: …. Construct a query
Virtual Private Cloud API	65	How do I remove a VPN client from the VPN server using the Virtual Private Cloud API?	Functionality: Delete a VPN client Description: This request disconnects and deletes the VPN client from the VPN server. The VPN client may reconnect unless its authentication permissions for the configured authentication methods (such as its client certificate) have been revoked. Endpoint: delete_vpn_server_client API: Virtual Private Cloud API	0	-2.17168	G
Virtual Private Cloud API	65	I'd like to delete a VPN client from my Virtual Private Cloud server using the Virtual Private Cloud API. Could you please help me craft a query to do that effectively?	Functionality: Delete a VPN client Description: This request disconnects and deletes the VPN client from the VPN server. The VPN client may reconnect unless its authentication permissions for the configured authentication methods (such as its client certificate) have been revoked. Endpoint: delete_vpn_server_client API: Virtual Private Cloud API	0	-2.16968	B	hallucination: .. Craft a query ..
Virtual Private Cloud API	65	How do I remove a VPN client from my VPN server using the Virtual Private Cloud API?	Functionality: Delete a VPN client Description: This request disconnects and deletes the VPN client from the VPN server. The VPN client may reconnect unless its authentication permissions for the configured authentication methods (such as its client certificate) have been revoked. Endpoint: delete_vpn_server_client API: Virtual Private Cloud API	0	-2.14846	G
Virtual Private Cloud API	66	I want to delete all snapshots created from a specific source volume using the Virtual Private Cloud API. Could you please guide me through the process?	Functionality: Delete a filtered collection of snapshots Description: This request deletes all snapshots created from a specific source volume Endpoint: delete_snapshots API: Virtual Private Cloud API	0	-2.06202	G
Virtual Private Cloud API	66	I'd like to delete all snapshots created from a specific source volume using the Virtual Private Cloud API. How would I go about doing that?	Functionality: Delete a filtered collection of snapshots Description: This request deletes all snapshots created from a specific source volume Endpoint: delete_snapshots API: Virtual Private Cloud API	0	-2.0532	G
Virtual Private Cloud API	66	User query: I'd like to delete all snapshots created from a specific volume using the Virtual Private Cloud API. How can I do that?	Functionality: Delete a filtered collection of snapshots Description: This request deletes all snapshots created from a specific source volume Endpoint: delete_snapshots API: Virtual Private Cloud API	0	-2.15802	B	Bad Format: instruction is pre-pended by agent-like response 'User query:'
Virtual Private Cloud API	66	User query: I want to delete all snapshots created from a specific source volume using the Virtual Private Cloud API. Could you help me with that?	Functionality: Delete a filtered collection of snapshots Description: This request deletes all snapshots created from a specific source volume Endpoint: delete_snapshots API: Virtual Private Cloud API	0	-2.04538	B	Bad Format: instruction is pre-pended by agent-like response 'User query:'
Virtual Private Cloud API	66	Here's a possible user query: "I'd like to delete all snapshots that were created from a specific source volume using the Virtual Private Cloud API. Could you please help me craft a query for that?"	Functionality: Delete a filtered collection of snapshots Description: This request deletes all snapshots created from a specific source volume Endpoint: delete_snapshots API: Virtual Private Cloud API	0	-2.0094	B	Bad Format: instruction is pre-pended by agent-like response 'Here's a possible user query:'
Virtual Private Cloud API	67	I'd like to disconnect a floating IP from a network interface on a bare metal server using the Virtual Private Cloud API. Could you please help me construct the proper query for that?	Functionality: Disassociate a floating IP from a bare metal server network interface Description: This request disassociates the specified floating IP from the specified bare metal server network interface Endpoint: remove_bare_metal_server_network_interface_floating_ip API: Virtual Private Cloud API	0	-1.79001	B	hallucination: .. construct the proper query ..
Virtual Private Cloud API	67	User Query: How do I disassociate a floating IP from a network interface of a bare metal server using the Virtual Private Cloud API?	Functionality: Disassociate a floating IP from a bare metal server network interface Description: This request disassociates the specified floating IP from the specified bare metal server network interface Endpoint: remove_bare_metal_server_network_interface_floating_ip API: Virtual Private Cloud API	0	-1.61978	B	Bad Format: instruction is pre-pended by agent-like response 'User query:'
Virtual Private Cloud API	67	I'd like to know how to disassociate a floating IP from a bare metal server network interface using the Virtual Private Cloud API.	Functionality: Disassociate a floating IP from a bare metal server network interface Description: This request disassociates the specified floating IP from the specified bare metal server network interface Endpoint: remove_bare_metal_server_network_interface_floating_ip API: Virtual Private Cloud API	0	-1.53559	G
Virtual Private Cloud API	67	I'd like to know how I can use the Virtual Private Cloud API to disassociate a floating IP from a specific bare metal server network interface.	Functionality: Disassociate a floating IP from a bare metal server network interface Description: This request disassociates the specified floating IP from the specified bare metal server network interface Endpoint: remove_bare_metal_server_network_interface_floating_ip API: Virtual Private Cloud API	0	-1.48546	G
Virtual Private Cloud API	67	I want to disconnect a floating IP from the network interface of my bare metal server using the Virtual Private Cloud API. Can you help me craft a query for that?	Functionality: Disassociate a floating IP from a bare metal server network interface Description: This request disassociates the specified floating IP from the specified bare metal server network interface Endpoint: remove_bare_metal_server_network_interface_floating_ip API: Virtual Private Cloud API	0	-1.77085	B	hallucination: .. craft a query ..
Virtual Private Cloud API	68	I'd like to know how to view all the targets linked to a specific security group using the Virtual Private Cloud API.	Functionality: List all targets associated with a security group Description: This request lists all targets associated with a security group, to which the rules in the security group are applied. Endpoint: list_security_group_targets API: Virtual Private Cloud API	0	-1.611	G
Virtual Private Cloud API	68	How do I retrieve a list of all targets linked to a specific security group utilizing the Virtual Private Cloud API?	Functionality: List all targets associated with a security group Description: This request lists all targets associated with a security group, to which the rules in the security group are applied. Endpoint: list_security_group_targets API: Virtual Private Cloud API	0	-1.69659	G
Virtual Private Cloud API	68	How do I retrieve a list of all targets linked to a specific security group using the Virtual Private Cloud API?	Functionality: List all targets associated with a security group Description: This request lists all targets associated with a security group, to which the rules in the security group are applied. Endpoint: list_security_group_targets API: Virtual Private Cloud API	0	-1.68523	G
Virtual Private Cloud API	68	How do I find out which targets are linked to a specific security group using the Virtual Private Cloud API?	Functionality: List all targets associated with a security group Description: This request lists all targets associated with a security group, to which the rules in the security group are applied. Endpoint: list_security_group_targets API: Virtual Private Cloud API	0	-1.64849	G
Virtual Private Cloud API	68	How do I view a list of targets that are linked to a specific security group using the Virtual Private Cloud API?	Functionality: List all targets associated with a security group Description: This request lists all targets associated with a security group, to which the rules in the security group are applied. Endpoint: list_security_group_targets API: Virtual Private Cloud API	0	-1.64029	G
Virtual Private Cloud API	69	To create a new manager for an instance group using the Virtual Private Cloud API, here's a possible user query: "Hey, I'd like to assign a manager to my instance group. Could you please guide me on how to create a new instance group manager with the Virtual Private Cloud API?" or "I'd like to create a new manager for my instance group. Can you help me with the steps using the Virtual Private Clo…	Functionality: Create a manager for an instance group Description: This request creates a new instance group manager Endpoint: create_instance_group_manager API: Virtual Private Cloud API	0	-1.61319	B	Bad Format: instruction is pre-pended by agent-like response
Virtual Private Cloud API	69	How do I create a new manager for an instance group using the Virtual Private Cloud API?	Functionality: Create a manager for an instance group Description: This request creates a new instance group manager Endpoint: create_instance_group_manager API: Virtual Private Cloud API	0	-1.70229	G
Virtual Private Cloud API	69	User query: I want to create a manager for my instance group using the Virtual Private Cloud API. How should I format the request to do that?	Functionality: Create a manager for an instance group Description: This request creates a new instance group manager Endpoint: create_instance_group_manager API: Virtual Private Cloud API	0	-1.64456	B	Bad Format: instruction is pre-pended by agent-like response
Virtual Private Cloud API	69	User query: "Create an instance group manager using the Virtual Private Cloud API."	Functionality: Create a manager for an instance group Description: This request creates a new instance group manager Endpoint: create_instance_group_manager API: Virtual Private Cloud API	0	-1.84766	B	Bad Format: instruction is pre-pended by agent-like response
Virtual Private Cloud API	69	How do I create a new manager for an instance group using the Virtual Private Cloud API?	Functionality: Create a manager for an instance group Description: This request creates a new instance group manager Endpoint: create_instance_group_manager API: Virtual Private Cloud API	0	-1.70229	G
Virtual Private Cloud API	70	"I want to modify certain aspects of an existing Virtual Private Cloud, such as its CIDR block or internet gateway. How can I use the Virtual Private Cloud API to update the VPC with the new information?"	Functionality: Example request Description: This request updates a VPC with the information provided in a VPC patch object. The patch object is structured in the same way as a retrieved VPC and needs to contain only the information to be updated. Endpoint: update_vpc API: Virtual Private Cloud API	0	-2.43691	B	hallucination
Virtual Private Cloud API	70	I want to update the settings of my Virtual Private Cloud (VPC) using the Virtual Private Cloud API. Could you please guide me on how to construct a VPC patch object with the necessary updates and use the `update_vpc` request to apply these changes?	Functionality: Example request Description: This request updates a VPC with the information provided in a VPC patch object. The patch object is structured in the same way as a retrieved VPC and needs to contain only the information to be updated. Endpoint: update_vpc API: Virtual Private Cloud API	0	-2.10042	G	minor error: request instead of API call/endpoint, not 100% innacurate
Virtual Private Cloud API	70	How do I update the configuration of a Virtual Private Cloud (VPC) using the Virtual Private Cloud API? For instance, if I want to modify the CIDR block or add a new Internet Gateway, I can create a patch object with the desired updates and send it to the `update_vpc` API to apply the changes.	Functionality: Example request Description: This request updates a VPC with the information provided in a VPC patch object. The patch object is structured in the same way as a retrieved VPC and needs to contain only the information to be updated. Endpoint: update_vpc API: Virtual Private Cloud API	0	-2.24591	B	hallucination: question-answer format
Virtual Private Cloud API	70	I want to update the configuration of my Virtual Private Cloud (VPC) using the Virtual Private Cloud API. Could you please guide me on how to construct a "VPC patch object" with the required information to update the VPC, and then use that object to perform an update with the `update_vpc` API call?	Functionality: Example request Description: This request updates a VPC with the information provided in a VPC patch object. The patch object is structured in the same way as a retrieved VPC and needs to contain only the information to be updated. Endpoint: update_vpc API: Virtual Private Cloud API	0	-2.1419	G
Virtual Private Cloud API	70	I want to update my Virtual Private Cloud (VPC) with new details using the Virtual Private Cloud API. Could you please guide me on how to construct a VPC patch object and update the existing VPC with that using the `update_vpc` API?	Functionality: Example request Description: This request updates a VPC with the information provided in a VPC patch object. The patch object is structured in the same way as a retrieved VPC and needs to contain only the information to be updated. Endpoint: update_vpc API: Virtual Private Cloud API	0	-2.06661	B	It's calling the endpoint API
Virtual Private Cloud API	71	How do I find the public gateway associated with a specific subnet using the Virtual Private Cloud API?	Functionality: Retrieve a subnet's attached public gateway Description: This request retrieves the public gateway attached to the subnet specified by the identifier in the URL. Endpoint: get_subnet_public_gateway API: Virtual Private Cloud API	0	-1.69564	G
Virtual Private Cloud API	71	How can I obtain the public gateway linked to a specific subnet using the Virtual Private Cloud API?	Functionality: Retrieve a subnet's attached public gateway Description: This request retrieves the public gateway attached to the subnet specified by the identifier in the URL. Endpoint: get_subnet_public_gateway API: Virtual Private Cloud API	0	-1.65187	G
Virtual Private Cloud API	71	How do I get the public gateway that's attached to a specific subnet using the Virtual Private Cloud API?	Functionality: Retrieve a subnet's attached public gateway Description: This request retrieves the public gateway attached to the subnet specified by the identifier in the URL. Endpoint: get_subnet_public_gateway API: Virtual Private Cloud API	0	-1.60246	G
Virtual Private Cloud API	71	How do I get the public gateway associated with a specific subnet using the Virtual Private Cloud API?	Functionality: Retrieve a subnet's attached public gateway Description: This request retrieves the public gateway attached to the subnet specified by the identifier in the URL. Endpoint: get_subnet_public_gateway API: Virtual Private Cloud API	0	-1.66142	G
Virtual Private Cloud API	71	I want to know which public gateway is currently attached to my subnet using the Virtual Private Cloud API. Could you show me how to do that?	Functionality: Retrieve a subnet's attached public gateway Description: This request retrieves the public gateway attached to the subnet specified by the identifier in the URL. Endpoint: get_subnet_public_gateway API: Virtual Private Cloud API	0	-1.51704	G
Virtual Private Cloud API	72	I'd like to delete an existing file share using the Virtual Private Cloud API. Please provide the steps to effectively delete the share if it does not have any mount targets, its lifecycle state is not `updating`, and there are no replication operations in progress.	Functionality: Delete a file share Description: This request deletes a share. This operation cannot be reversed. A share cannot be deleted if it: - has share mount targets - has a `lifecycle_state` of `updating` - has a replication operation in progress If the request is accepted, the share `lifecycle_state` will be set to `deleting`. Once deletion processing completes, it will no longer be retri…	0	-1.77272	G
Virtual Private Cloud API	72	To delete a specific file share using the Virtual Private Cloud API: Hey, could you guide me on how to delete a file share with the Virtual Private Cloud API, provided it does not have any mount targets and its lifecycle state is not `updating`?	Functionality: Delete a file share Description: This request deletes a share. This operation cannot be reversed. A share cannot be deleted if it: - has share mount targets - has a `lifecycle_state` of `updating` - has a replication operation in progress If the request is accepted, the share `lifecycle_state` will be set to `deleting`. Once deletion processing completes, it will no longer be retri…	0	-1.88192	B	Bad Format: instruction is pre-pended by agent-like response
Virtual Private Cloud API	72	How can I delete a file share permanently using the Virtual Private Cloud API? But make sure it does not have any mount targets, is not in the 'updating' state, and doesn't have any replication operations in progress.	Functionality: Delete a file share Description: This request deletes a share. This operation cannot be reversed. A share cannot be deleted if it: - has share mount targets - has a `lifecycle_state` of `updating` - has a replication operation in progress If the request is accepted, the share `lifecycle_state` will be set to `deleting`. Once deletion processing completes, it will no longer be retri…	0	-1.79262	B	hallucination: this endpoint cannot make sure the share does not have mount targets, is in updating state, and does not have replication operations in progress.
Virtual Private Cloud API	72	If I want to delete a specific file share using the Virtual Private Cloud API, how should I formulate a query? Example query: I'd like to delete the file share named "my-fileshare" with the Virtual Private Cloud API. Please ensure there are no share mount targets, replication operations in progress, and the share lifecycle state is not 'updating' before attempting the deletion.	Functionality: Delete a file share Description: This request deletes a share. This operation cannot be reversed. A share cannot be deleted if it: - has share mount targets - has a `lifecycle_state` of `updating` - has a replication operation in progress If the request is accepted, the share `lifecycle_state` will be set to `deleting`. Once deletion processing completes, it will no longer be retri…	0	-1.69687	B	Bad Format: instruction is pre-pended by agent-like response
Virtual Private Cloud API	72	I'd like to delete an existing file share using the Virtual Private Cloud API. Please help me with the necessary query to accomplish this task efficiently.	Functionality: Delete a file share Description: This request deletes a share. This operation cannot be reversed. A share cannot be deleted if it: - has share mount targets - has a `lifecycle_state` of `updating` - has a replication operation in progress If the request is accepted, the share `lifecycle_state` will be set to `deleting`. Once deletion processing completes, it will no longer be retri…	0	-2.11726	B	hallucination: .. query ..
Virtual Private Cloud API	73	How do I find all floating IPs linked to a specific instance network interface using the Virtual Private Cloud API?	Functionality: List all floating IPs associated with an instance network interface Description: This request lists all floating IPs associated with an instance network interface. Endpoint: list_instance_network_interface_floating_ips API: Virtual Private Cloud API	0	-1.30667	G
Virtual Private Cloud API	73	Could you please show me how to view a list of all floating IPs connected to a specific instance network interface using the Virtual Private Cloud API?	Functionality: List all floating IPs associated with an instance network interface Description: This request lists all floating IPs associated with an instance network interface. Endpoint: list_instance_network_interface_floating_ips API: Virtual Private Cloud API	0	-1.32507	G
Virtual Private Cloud API	73	How can I find and display all floating IPs attached to a specific instance network interface using the Virtual Private Cloud API?	Functionality: List all floating IPs associated with an instance network interface Description: This request lists all floating IPs associated with an instance network interface. Endpoint: list_instance_network_interface_floating_ips API: Virtual Private Cloud API	0	-1.36773	G
Virtual Private Cloud API	73	How do I view a list of floating IPs connected to a specific network interface using the Virtual Private Cloud API?	Functionality: List all floating IPs associated with an instance network interface Description: This request lists all floating IPs associated with an instance network interface. Endpoint: list_instance_network_interface_floating_ips API: Virtual Private Cloud API	0	-1.53172	G
Virtual Private Cloud API	73	"I want to see a list of all floating IPs linked to a specific instance network interface. How can I achieve this using the Virtual Private Cloud API?"	Functionality: List all floating IPs associated with an instance network interface Description: This request lists all floating IPs associated with an instance network interface. Endpoint: list_instance_network_interface_floating_ips API: Virtual Private Cloud API	0	-1.28233	G	minor error: instruction is between quotations
Virtual Private Cloud API	74	I want to replace the current network access control list (ACL) for a specific subnet with a new one using the Virtual Private Cloud API. How can I make a request to do that?	Functionality: Replace the network ACL for a subnet Description: This request replaces the existing network ACL for a subnet with the network ACL specified in the request body. Endpoint: replace_subnet_network_acl API: Virtual Private Cloud API	0	-1.30485	G	minor error: 'with a new one' does not make sense
Virtual Private Cloud API	74	To replace the network ACL for a specific subnet using the Virtual Private Cloud API, please use the following query: "Show me how to replace the current network ACL for a particular subnet with a new one, using the Virtual Private Cloud API." Assume the JSON request body format for specifying a new network ACL ID: ```json { "SubnetId": "subnet-XXXXXXXX", "NetworkAclId": "acl-YYYYYYYY" } ```	Functionality: Replace the network ACL for a subnet Description: This request replaces the existing network ACL for a subnet with the network ACL specified in the request body. Endpoint: replace_subnet_network_acl API: Virtual Private Cloud API	0	-1.25511	B	Bad Format: we cannot know the json body is right.
Virtual Private Cloud API	74	To replace the network ACL for a subnet using the Virtual Private Cloud API, you can use the following query: "How do I update the network access control list (ACL) for a specific subnet in Virtual Private Cloud (VPC) with new settings provided in the request body?"	Functionality: Replace the network ACL for a subnet Description: This request replaces the existing network ACL for a subnet with the network ACL specified in the request body. Endpoint: replace_subnet_network_acl API: Virtual Private Cloud API	0	-1.24411	B	Bad Format: instruction is pre-pended by agent-like response
Virtual Private Cloud API	74	How do I replace the current network ACL for a specific subnet using the Virtual Private Cloud API?	Functionality: Replace the network ACL for a subnet Description: This request replaces the existing network ACL for a subnet with the network ACL specified in the request body. Endpoint: replace_subnet_network_acl API: Virtual Private Cloud API	0	-1.31419	G
Virtual Private Cloud API	74	I want to replace the network ACL for a specific subnet using the Virtual Private Cloud API. Could you assist me in crafting a request to accomplish this task?	Functionality: Replace the network ACL for a subnet Description: This request replaces the existing network ACL for a subnet with the network ACL specified in the request body. Endpoint: replace_subnet_network_acl API: Virtual Private Cloud API	0	-1.28178	G
Virtual Private Cloud API	75	I'd like to get the details of a specific instance group membership using the Virtual Private Cloud API. Could you help me write a query to retrieve that information?	Functionality: Retrieve an instance group membership Description: This request retrieves a single instance group membership specified by identifier in the URL. Endpoint: get_instance_group_membership API: Virtual Private Cloud API	0	-1.77174	B	hallucination: .. query ..
Virtual Private Cloud API	75	I want to retrieve the details of a specific instance group membership using the Virtual Private Cloud API. Could you please help me craft a query for that?	Functionality: Retrieve an instance group membership Description: This request retrieves a single instance group membership specified by identifier in the URL. Endpoint: get_instance_group_membership API: Virtual Private Cloud API	0	-1.76267	B	hallucination: .. query ..
Virtual Private Cloud API	75	"How do I retrieve specific instance group membership details using the Virtual Private Cloud API?"	Functionality: Retrieve an instance group membership Description: This request retrieves a single instance group membership specified by identifier in the URL. Endpoint: get_instance_group_membership API: Virtual Private Cloud API	0	-1.8574	G
Virtual Private Cloud API	75	How do I get the details of a specific instance group membership using the Virtual Private Cloud API?	Functionality: Retrieve an instance group membership Description: This request retrieves a single instance group membership specified by identifier in the URL. Endpoint: get_instance_group_membership API: Virtual Private Cloud API	0	-1.7845	G
Virtual Private Cloud API	75	How can I get the details of a specific instance group membership using the Virtual Private Cloud API?	Functionality: Retrieve an instance group membership Description: This request retrieves a single instance group membership specified by identifier in the URL. Endpoint: get_instance_group_membership API: Virtual Private Cloud API	0	-1.77679	G
Virtual Private Cloud API	76	If you want to delete a specific load balancer using the Virtual Private Cloud API, follow these steps: First, make sure the load balancer's `provisioning_status` is not `delete_pending`, as you cannot delete it if it is. To check this status, use the list load balancers command: ``` $ aws elbv2 describe-load-balancers --region us-west-2 --load-balancer-arn arn:aws:elasticloadbalancing:us-west-2:…	Functionality: Delete a load balancer Description: This request deletes a load balancer. This operation cannot be reversed. A load balancer cannot be deleted if its `provisioning_status` is `delete_pending`. Endpoint: delete_load_balancer API: Virtual Private Cloud API	0	-1.19554	B	Bad Format: not an instruction
Virtual Private Cloud API	76	I'd like to delete an existing load balancer using the Virtual Private Cloud API. Please help me construct a query to delete the specified load balancer with certainty.	Functionality: Delete a load balancer Description: This request deletes a load balancer. This operation cannot be reversed. A load balancer cannot be deleted if its `provisioning_status` is `delete_pending`. Endpoint: delete_load_balancer API: Virtual Private Cloud API	0	-1.90585	B	hallucination: .. query ..
Virtual Private Cloud API	76	I'd like to delete an existing load balancer using the Virtual Private Cloud API. Please provide me with the correct steps to initiate this action while ensuring that the load balancer's `provisioning_status` is not set to `delete_pending`.	Functionality: Delete a load balancer Description: This request deletes a load balancer. This operation cannot be reversed. A load balancer cannot be deleted if its `provisioning_status` is `delete_pending`. Endpoint: delete_load_balancer API: Virtual Private Cloud API	0	-1.46656	B	hallucination: this endpoint cannot make ensure to comply with the constraints
Virtual Private Cloud API	76	I'd like to delete an existing load balancer using the Virtual Private Cloud API. How do I format the request for this?	Functionality: Delete a load balancer Description: This request deletes a load balancer. This operation cannot be reversed. A load balancer cannot be deleted if its `provisioning_status` is `delete_pending`. Endpoint: delete_load_balancer API: Virtual Private Cloud API	0	-1.89783	G	request can be a synonim of api call
Virtual Private Cloud API	76	I want to delete an existing load balancer using the Virtual Private Cloud API. How should I structure my request for this operation?	Functionality: Delete a load balancer Description: This request deletes a load balancer. This operation cannot be reversed. A load balancer cannot be deleted if its `provisioning_status` is `delete_pending`. Endpoint: delete_load_balancer API: Virtual Private Cloud API	0	-1.90571	G	request can be a synonim of api call
Virtual Private Cloud API	77	If my file share on Amazon FSx for Windows File Server is currently experiencing issues and I want to trigger a failover to the replica file share, how would I do that using the Virtual Private Cloud API?	Functionality: Failover to replica file share Description: This request triggers a failover to the replica file share specified by the identifier in the URL. The failover cannot be started if a source share or the replica share has a `lifecycle_state` of `updating`, or has a replication operation in progress. If `fallback_policy` is specified as `split`, and the request is accepted but the failov…	0	-2.51611	B	hallucination: Amazon FSx for Windows File Server
Virtual Private Cloud API	77	I'd like to trigger a failover to a specific replica file share using the Virtual Private Cloud API. Could you please provide me with instructions on how to do that? For instance, given the identifier of the replica file share I'd like to failover to, how can I utilize the Virtual Private Cloud API to initiate the failover process? Additionally, what are the prerequisites or conditions for a succ…	Functionality: Failover to replica file share Description: This request triggers a failover to the replica file share specified by the identifier in the URL. The failover cannot be started if a source share or the replica share has a `lifecycle_state` of `updating`, or has a replication operation in progress. If `fallback_policy` is specified as `split`, and the request is accepted but the failov…	0	-2.47134	B	hallucination
Virtual Private Cloud API	77	I'd like to know how to initiate a failover to a specific replica file share using the Virtual Private Cloud API. Please help me craft that query.	Functionality: Failover to replica file share Description: This request triggers a failover to the replica file share specified by the identifier in the URL. The failover cannot be started if a source share or the replica share has a `lifecycle_state` of `updating`, or has a replication operation in progress. If `fallback_policy` is specified as `split`, and the request is accepted but the failov…	0	-2.5089	G
Virtual Private Cloud API	77	I want to initiate a failover to a replica file share using the Virtual Private Cloud API. Help me craft the correct query to make this happen.	Functionality: Failover to replica file share Description: This request triggers a failover to the replica file share specified by the identifier in the URL. The failover cannot be started if a source share or the replica share has a `lifecycle_state` of `updating`, or has a replication operation in progress. If `fallback_policy` is specified as `split`, and the request is accepted but the failov…	0	-2.44097	B	hallucination: .. query ..
Virtual Private Cloud API	77	If I want to failover to a replica file share using the Virtual Private Cloud API, how do I trigger this operation? The API allows me to specify the identifier of the replica file share I want to failover to. However, this failover cannot be initiated if the source share or the replica share is in an "updating" state or if a replication operation is in progress. If the request is accepted but the…	Functionality: Failover to replica file share Description: This request triggers a failover to the replica file share specified by the identifier in the URL. The failover cannot be started if a source share or the replica share has a `lifecycle_state` of `updating`, or has a replication operation in progress. If `fallback_policy` is specified as `split`, and the request is accepted but the failov…	0	-1.77408	B	verbose
Virtual Private Cloud API	78	Here's a user query that effectively utilizes the Virtual Private Cloud API to list all placement groups: "How do I view a list of all availableplacement groups in my region using the Virtual Private Cloud API?"	Functionality: List all placement groups Description: This request lists all placement groups in the region. Endpoint: list_placement_groups API: Virtual Private Cloud API	0	-1.8103	B	Bad Format: instruction is pre-pended by agent-like response
Virtual Private Cloud API	78	User query: I'd like to know how to list all the existing placement groups in my AWS region using the Virtual Private Cloud API.	Functionality: List all placement groups Description: This request lists all placement groups in the region. Endpoint: list_placement_groups API: Virtual Private Cloud API	0	-1.78287	B	Bad Format: instruction is pre-pended by agent-like response
Virtual Private Cloud API	78	User query: I want to list all placement groups I have in my AWS region using the Virtual Private Cloud API. Could you please provide an example command or query for that?	Functionality: List all placement groups Description: This request lists all placement groups in the region. Endpoint: list_placement_groups API: Virtual Private Cloud API	0	-1.7566	B	Bad Format: instruction is pre-pended by agent-like response
Virtual Private Cloud API	78	User query: I want to know how to list all the availability zones and their associated placement groups in a region using the Virtual Private Cloud API. Can you please help me construct a query for that?	Functionality: List all placement groups Description: This request lists all placement groups in the region. Endpoint: list_placement_groups API: Virtual Private Cloud API	0	-2.4645	B	Bad Format: instruction is pre-pended by agent-like response
Virtual Private Cloud API	78	How do I find all the existing placement groups in a region using the Virtual Private Cloud API?	Functionality: List all placement groups Description: This request lists all placement groups in the region. Endpoint: list_placement_groups API: Virtual Private Cloud API	0	-1.88289	G
Virtual Private Cloud API	79	To add a local CIDR to an existing VPN gateway connection using the Virtual Private Cloud API, please issue the following query: "How do I set a local CIDR for a VPN gateway connection with the Virtual Private Cloud API?"	Functionality: Set a local CIDR on a VPN gateway connection Description: This request adds the specified CIDR to the specified VPN gateway connection. This request succeeds if the specified CIDR already exists. A request body is not required, and if provided, is ignored. This request is only supported for policy mode VPN gateways. Endpoint: add_vpn_gateway_connection_local_cidr API: Virtual Priva…	0	-1.91779	B	Bad Format: instruction is pre-pended by agent-like response
Virtual Private Cloud API	79	I'd like to add a local CIDR to an existing VPN gateway connection using the Virtual Private Cloud API. How do I do that?	Functionality: Set a local CIDR on a VPN gateway connection Description: This request adds the specified CIDR to the specified VPN gateway connection. This request succeeds if the specified CIDR already exists. A request body is not required, and if provided, is ignored. This request is only supported for policy mode VPN gateways. Endpoint: add_vpn_gateway_connection_local_cidr API: Virtual Priva…	0	-1.9517	G
Virtual Private Cloud API	79	I'd like to extend my existing VPN gateway connection in Virtual Private Cloud by adding a local CIDR. How do I accomplish this using the API?	Functionality: Set a local CIDR on a VPN gateway connection Description: This request adds the specified CIDR to the specified VPN gateway connection. This request succeeds if the specified CIDR already exists. A request body is not required, and if provided, is ignored. This request is only supported for policy mode VPN gateways. Endpoint: add_vpn_gateway_connection_local_cidr API: Virtual Priva…	0	-1.98372	G
Virtual Private Cloud API	79	I'd like to add a local CIDR to an existing VPN gateway connection using the Virtual Private Cloud API. How do I accomplish that?	Functionality: Set a local CIDR on a VPN gateway connection Description: This request adds the specified CIDR to the specified VPN gateway connection. This request succeeds if the specified CIDR already exists. A request body is not required, and if provided, is ignored. This request is only supported for policy mode VPN gateways. Endpoint: add_vpn_gateway_connection_local_cidr API: Virtual Priva…	0	-1.95808	G
Virtual Private Cloud API	79	How do I add a local CIDR to a VPN gateway connection using the Virtual Private Cloud API?	Functionality: Set a local CIDR on a VPN gateway connection Description: This request adds the specified CIDR to the specified VPN gateway connection. This request succeeds if the specified CIDR already exists. A request body is not required, and if provided, is ignored. This request is only supported for policy mode VPN gateways. Endpoint: add_vpn_gateway_connection_local_cidr API: Virtual Priva…	0	-2.01945	G
Virtual Private Cloud API	80	If you want to create a new inbound rule for a security group that allows access to port 80 using the Virtual Private Cloud API, here's how you can formulate the query: "I want to add a new rule to my security group that allows incoming traffic on port 80. Could you please help me with creating this rule using the Virtual Private Cloud API?"	Functionality: Create a rule for a security group Description: This request creates a new security group rule from a security group rule prototype object. The prototype object is structured in the same way as a retrieved security group rule and contains the information necessary to create the rule. As part of creating a new rule in a security group, the rule is applied to all the networking inter…	0	-1.77664	B	Bad Format: instruction is pre-pended by agent-like response
Virtual Private Cloud API	80	User: I want to create a new rule in an existing security group that allows inbound traffic on port 80 using the Virtual Private Cloud API. How do I do that?	Functionality: Create a rule for a security group Description: This request creates a new security group rule from a security group rule prototype object. The prototype object is structured in the same way as a retrieved security group rule and contains the information necessary to create the rule. As part of creating a new rule in a security group, the rule is applied to all the networking inter…	0	-1.78309	B	Bad Format: instruction is pre-pended by agent-like response
Virtual Private Cloud API	80	I'd be happy to help you create a new security group rule using the Virtual Private Cloud API. Here's an example query: "Could you please guide me on how to create a new security group rule that allows inbound TCP traffic on port 80 for a specific security group using the Virtual Private Cloud API?"	Functionality: Create a rule for a security group Description: This request creates a new security group rule from a security group rule prototype object. The prototype object is structured in the same way as a retrieved security group rule and contains the information necessary to create the rule. As part of creating a new rule in a security group, the rule is applied to all the networking inter…	0	-1.79757	B	Bad Format: instruction is pre-pended by agent-like response
Virtual Private Cloud API	80	Create a security group rule with the Virtual Private Cloud API: I want to add a new rule to my security group that permits inbound traffic on port 80 using the API. Here's the format for the request: ```json { "IpProtocol": "tcp", "FromPort": 80, "ToPort": 80, "CidrIp": "0.0.0.0/0" } ``` Help me craft the appropriate API call to create this rule using the provided JSON payload.	Functionality: Create a rule for a security group Description: This request creates a new security group rule from a security group rule prototype object. The prototype object is structured in the same way as a retrieved security group rule and contains the information necessary to create the rule. As part of creating a new rule in a security group, the rule is applied to all the networking inter…	0	-1.84078	B	Bad Format: we cannot know the json body is right.
Virtual Private Cloud API	80	I'd be happy to help you create a new rule for a security group using the Virtual Private Cloud API. Here's an example of a user query: "Hey there, I need to create a new security group rule that allows inbound traffic on port 80 using the Virtual Private Cloud API. Could you please guide me through the process of creating a rule prototype object with the necessary information and then using the …	Functionality: Create a rule for a security group Description: This request creates a new security group rule from a security group rule prototype object. The prototype object is structured in the same way as a retrieved security group rule and contains the information necessary to create the rule. As part of creating a new rule in a security group, the rule is applied to all the networking inter…	0	-1.5557	B	Bad Format: instruction is pre-pended by agent-like response
Virtual Private Cloud API	81	How do I update an existing VPC route using the Virtual Private Cloud API? Provide me with the necessary details to send a valid update request for a VPC route.	Functionality: Update a VPC route Description: This request updates a route with the information in a provided route patch. The route patch object is structured in the same way as a retrieved route and contains only the information to be updated. Endpoint: update_vpc_route API: Virtual Private Cloud API	0	-2.18493	G
Virtual Private Cloud API	81	To update an existing VPC route using the Virtual Private Cloud API, follow these steps: 1. Prepare the route patch: Create a JSON object that contains only the information you wish to update, following the same structure as a retrieved route. For instance, if you want to update the target for a route, include the 'GatewayId' or 'InstanceId' in the route patch. 2. Construct the update request: Us…	Functionality: Update a VPC route Description: This request updates a route with the information in a provided route patch. The route patch object is structured in the same way as a retrieved route and contains only the information to be updated. Endpoint: update_vpc_route API: Virtual Private Cloud API	0	-1.48836	B	Bad Format: instruction is pre-pended by agent-like response
Virtual Private Cloud API	81	I'd like to update an existing VPC route using the Virtual Private Cloud API. Could you please guide me on how to prepare and send a request with a valid route patch to update the specified VPC route?	Functionality: Update a VPC route Description: This request updates a route with the information in a provided route patch. The route patch object is structured in the same way as a retrieved route and contains only the information to be updated. Endpoint: update_vpc_route API: Virtual Private Cloud API	0	-1.98551	G
Virtual Private Cloud API	81	I want to modify a VPC route using the Virtual Private Cloud API. Could you please guide me on how to construct a request body with a route patch to update the destination and next hop for an existing VPC route?	Functionality: Update a VPC route Description: This request updates a route with the information in a provided route patch. The route patch object is structured in the same way as a retrieved route and contains only the information to be updated. Endpoint: update_vpc_route API: Virtual Private Cloud API	0	-2.20774	B	hallucination: to update the destination and next hop
Virtual Private Cloud API	81	How do I update a specific VPC route using the provided details with the Virtual Private Cloud API?	Functionality: Update a VPC route Description: This request updates a route with the information in a provided route patch. The route patch object is structured in the same way as a retrieved route and contains only the information to be updated. Endpoint: update_vpc_route API: Virtual Private Cloud API	0	-2.11251	G
Virtual Private Cloud API	82	User: I want to obtain information about a specific placement group using the Virtual Private Cloud API. Can you help me craft a query to retrieve this information? Assistant: Of course! With the Virtual Private Cloud API, you can easily get details for a specific placement group. Here's an example of a user query for retrieving a placement group based on its identifier: Query: "Retrieve details …	Functionality: Retrieve a placement group Description: This request retrieves a single placement group specified by identifier in the URL. Endpoint: get_placement_group API: Virtual Private Cloud API	0	-2.00772	B	Bad Format: instruction is pre-pended by agent-like response
Virtual Private Cloud API	82	How do I get the details of a specific placement group using the Virtual Private Cloud API?	Functionality: Retrieve a placement group Description: This request retrieves a single placement group specified by identifier in the URL. Endpoint: get_placement_group API: Virtual Private Cloud API	0	-2.03634	G
Virtual Private Cloud API	82	How do I get details about a specific placement group using the Virtual Private Cloud API?	Functionality: Retrieve a placement group Description: This request retrieves a single placement group specified by identifier in the URL. Endpoint: get_placement_group API: Virtual Private Cloud API	0	-2.04981	G
Virtual Private Cloud API	82	How do I get details about a specific placement group using the Virtual Private Cloud API?	Functionality: Retrieve a placement group Description: This request retrieves a single placement group specified by identifier in the URL. Endpoint: get_placement_group API: Virtual Private Cloud API	0	-2.04981	G
Virtual Private Cloud API	82	How do I fetch details about a specific placement group using the Virtual Private Cloud API?	Functionality: Retrieve a placement group Description: This request retrieves a single placement group specified by identifier in the URL. Endpoint: get_placement_group API: Virtual Private Cloud API	0	-2.06409	G
Virtual Private Cloud API	83	Here's an example query a user might use when wanting to remove a target from a security group using the Virtual Private Cloud API: "I have a target that I need to remove from one of my security groups. Which API call should I use with Virtual Private Cloud API for this task? And how do I specify the target identifier in the query?"	Functionality: Remove a target from a security group Description: This request removes a target from a security group. For this request to succeed, the target must be attached to at least one other security group. The specified target identifier can be: - A bare metal server network interface identifier - A virtual network interface identifier - A VPN server identifier - An application load balan…	0	-2.18913	B	Bad Format: not an instruction
Virtual Private Cloud API	83	I'd like to remove a target from a specific security group using the Virtual Private Cloud API. Which target identifier and security group ID should I provide for the `delete_security_group_target_binding` request?	Functionality: Remove a target from a security group Description: This request removes a target from a security group. For this request to succeed, the target must be attached to at least one other security group. The specified target identifier can be: - A bare metal server network interface identifier - A virtual network interface identifier - A VPN server identifier - An application load balan…	0	-2.05602	B	hallucination: instrucition is not requesting an example
Virtual Private Cloud API	83	I'd like to remove a specific instance network interface from a security group using the Virtual Private Cloud API. Could you please guide me on how to craft that request?	Functionality: Remove a target from a security group Description: This request removes a target from a security group. For this request to succeed, the target must be attached to at least one other security group. The specified target identifier can be: - A bare metal server network interface identifier - A virtual network interface identifier - A VPN server identifier - An application load balan…	0	-2.27814	G
Virtual Private Cloud API	83	User: "I want to remove a specific network interface from a security group using the Virtual Private Cloud API. How do I format the query for that?"	Functionality: Remove a target from a security group Description: This request removes a target from a security group. For this request to succeed, the target must be attached to at least one other security group. The specified target identifier can be: - A bare metal server network interface identifier - A virtual network interface identifier - A VPN server identifier - An application load balan…	0	-2.29668	B	Bad Format: instruction is pre-pended by agent-like response
Virtual Private Cloud API	83	User query: I want to remove a specific instance network interface from a security group using the Virtual Private Cloud API. How do I format the request to achieve that?	Functionality: Remove a target from a security group Description: This request removes a target from a security group. For this request to succeed, the target must be attached to at least one other security group. The specified target identifier can be: - A bare metal server network interface identifier - A virtual network interface identifier - A VPN server identifier - An application load balan…	0	-2.29483	B	Bad Format: instruction is pre-pended by agent-like response
Virtual Private Cloud API	84	I want to update the details of an existing snapshot using the Virtual Private Cloud API. Please help me construct a request to achieve this.	Functionality: Update a snapshot Description: This request updates a snapshot with the information in a provided snapshot patch. The snapshot consistency group patch object is structured in the same way as a retrieved snapshot and contains only the information to be updated. Endpoint: update_snapshot API: Virtual Private Cloud API	0	-2.66521	G
Virtual Private Cloud API	84	I want to update an existing snapshot using the Virtual Private Cloud API. Could you please guide me on how to create and use a snapshot patch to update the snapshot with the latest information?	Functionality: Update a snapshot Description: This request updates a snapshot with the information in a provided snapshot patch. The snapshot consistency group patch object is structured in the same way as a retrieved snapshot and contains only the information to be updated. Endpoint: update_snapshot API: Virtual Private Cloud API	0	-2.3681	G
Virtual Private Cloud API	84	I'd like to update an existing snapshot using the Virtual Private Cloud API. Please provide me with the steps to create and use a snapshot patch to modify the snapshot's details.	Functionality: Update a snapshot Description: This request updates a snapshot with the information in a provided snapshot patch. The snapshot consistency group patch object is structured in the same way as a retrieved snapshot and contains only the information to be updated. Endpoint: update_snapshot API: Virtual Private Cloud API	0	-2.54619	G
Virtual Private Cloud API	84	I'd like to update an existing snapshot using the Virtual Private Cloud API. Could you provide me with the proper syntax and any necessary information to create a snapshot patch and update an existing snapshot using the 'update\_snapshot' API?	Functionality: Update a snapshot Description: This request updates a snapshot with the information in a provided snapshot patch. The snapshot consistency group patch object is structured in the same way as a retrieved snapshot and contains only the information to be updated. Endpoint: update_snapshot API: Virtual Private Cloud API	0	-2.64934	B	It's calling the endpoint API
Virtual Private Cloud API	84	I'd like to know how to update a snapshot using the Virtual Private Cloud API. Do I need to provide a snapshot patch containing the information to be updated?	Functionality: Update a snapshot Description: This request updates a snapshot with the information in a provided snapshot patch. The snapshot consistency group patch object is structured in the same way as a retrieved snapshot and contains only the information to be updated. Endpoint: update_snapshot API: Virtual Private Cloud API	0	-2.37956	G
Virtual Private Cloud API	85	How do I retrieve a list of all file shares in the region using the Virtual Private Cloud API?	Functionality: List all file shares Description: This request lists all file shares in the region. Endpoint: list_shares API: Virtual Private Cloud API	0	-1.83075	G
Virtual Private Cloud API	85	How do I retrieve a list of all file shares in my region using the Virtual Private Cloud API?	Functionality: List all file shares Description: This request lists all file shares in the region. Endpoint: list_shares API: Virtual Private Cloud API	0	-1.89123	G
Virtual Private Cloud API	85	How do I use the Virtual Private Cloud API to view a list of all file shares in the region?	Functionality: List all file shares Description: This request lists all file shares in the region. Endpoint: list_shares API: Virtual Private Cloud API	0	-1.72691	G
Virtual Private Cloud API	85	How do I retrieve a list of all file shares in my region using the Virtual Private Cloud API?	Functionality: List all file shares Description: This request lists all file shares in the region. Endpoint: list_shares API: Virtual Private Cloud API	0	-1.89123	G
Virtual Private Cloud API	85	How do I retrieve a list of all file shares I have access to using the Virtual Private Cloud API?	Functionality: List all file shares Description: This request lists all file shares in the region. Endpoint: list_shares API: Virtual Private Cloud API	0	-2.18075	G
Virtual Private Cloud API	86	How do I update the configuration of a dedicated host using the Virtual Private Cloud API? Provide me with an example of a dedicated host patch to update the information of an existing dedicated host.	Functionality: Update a dedicated host Description: This request updates a dedicated host with the information in a provided dedicated host patch. The dedicated host patch object is structured in the same way as a retrieved dedicated host and contains only the information to be updated. Endpoint: update_dedicated_host API: Virtual Private Cloud API	0	-2.08911	G
Virtual Private Cloud API	86	I want to update the configuration of a dedicated host using the Virtual Private Cloud API. Could you guide me on how to create and send a request with the correct information to update the dedicated host?	Functionality: Update a dedicated host Description: This request updates a dedicated host with the information in a provided dedicated host patch. The dedicated host patch object is structured in the same way as a retrieved dedicated host and contains only the information to be updated. Endpoint: update_dedicated_host API: Virtual Private Cloud API	0	-2.19584	G
Virtual Private Cloud API	86	I would like to update the configuration of a dedicated host using the Virtual Private Cloud API. Please provide me with an example of how to create a dedicated host patch and send it to the API to update the dedicated host.	Functionality: Update a dedicated host Description: This request updates a dedicated host with the information in a provided dedicated host patch. The dedicated host patch object is structured in the same way as a retrieved dedicated host and contains only the information to be updated. Endpoint: update_dedicated_host API: Virtual Private Cloud API	0	-2.06991	G
Virtual Private Cloud API	86	I want to update the configuration of a dedicated host using the Virtual Private Cloud API. Could you please provide an example of how to construct and send a request to update a dedicated host with the latest information?	Functionality: Update a dedicated host Description: This request updates a dedicated host with the information in a provided dedicated host patch. The dedicated host patch object is structured in the same way as a retrieved dedicated host and contains only the information to be updated. Endpoint: update_dedicated_host API: Virtual Private Cloud API	0	-2.10749	G
Virtual Private Cloud API	86	Show me how to update the configuration of a dedicated host using the Virtual Private Cloud API. I have a dedicated host patch ready with the new information I want to apply. Can you help me make the request to update the dedicated host with this patch?	Functionality: Update a dedicated host Description: This request updates a dedicated host with the information in a provided dedicated host patch. The dedicated host patch object is structured in the same way as a retrieved dedicated host and contains only the information to be updated. Endpoint: update_dedicated_host API: Virtual Private Cloud API	0	-2.00065	G
Virtual Private Cloud API	87	I'd like to create a new rule for my network access control list (ACL) using the Virtual Private Cloud API. Could you please help me construct the request with the necessary information from a rule prototype object?	Functionality: Create a rule for a network ACL Description: This request creates a new rule from a network ACL rule prototype object. The prototype object is structured in the same way as a retrieved rule, and contains the information necessary to create the new rule. Endpoint: create_network_acl_rule API: Virtual Private Cloud API	0	-1.75901	G
Virtual Private Cloud API	87	User query: I'd like to create a new network access control list (ACL) rule using the Virtual Private Cloud API. Could you please guide me through the process of creating a rule from a rule prototype object?	Functionality: Create a rule for a network ACL Description: This request creates a new rule from a network ACL rule prototype object. The prototype object is structured in the same way as a retrieved rule, and contains the information necessary to create the new rule. Endpoint: create_network_acl_rule API: Virtual Private Cloud API	0	-1.82418	B	Bad Format: instruction is pre-pended by agent-like response
Virtual Private Cloud API	87	I'd like to create a new rule for my network access control list (ACL) using the Virtual Private Cloud API. Could you help me craft the request with the necessary details from the rule prototype object?	Functionality: Create a rule for a network ACL Description: This request creates a new rule from a network ACL rule prototype object. The prototype object is structured in the same way as a retrieved rule, and contains the information necessary to create the new rule. Endpoint: create_network_acl_rule API: Virtual Private Cloud API	0	-1.77953	G
Virtual Private Cloud API	87	I'd like to create a new rule for my network access control list (ACL) using the Virtual Private Cloud API. Could you please provide instructions on how to format and send a request to create a rule based on a rule prototype object?	Functionality: Create a rule for a network ACL Description: This request creates a new rule from a network ACL rule prototype object. The prototype object is structured in the same way as a retrieved rule, and contains the information necessary to create the new rule. Endpoint: create_network_acl_rule API: Virtual Private Cloud API	0	-1.77843	G
Virtual Private Cloud API	87	How to create a new rule in a network access control list (ACL) using the Virtual Private Cloud API?	Functionality: Create a rule for a network ACL Description: This request creates a new rule from a network ACL rule prototype object. The prototype object is structured in the same way as a retrieved rule, and contains the information necessary to create the new rule. Endpoint: create_network_acl_rule API: Virtual Private Cloud API	0	-2.09877	G
Virtual Private Cloud API	88	To get the OpenVPN client configuration for a VPN server using the Virtual Private Cloud API, please use the following query: "Please help me retrieve the OpenVPN client configuration for a specific VPN server utilizing the Virtual Private Cloud API."	Functionality: Retrieve client configuration Description: This request retrieves OpenVPN client configuration on a single VPN server specified by the identifier in the URL. This configuration includes directives compatible with OpenVPN releases 2.4 and 2.5 Endpoint: get_vpn_server_client_configuration API: Virtual Private Cloud API	0	-2.03541	B	Bad Format: instruction is pre-pended by agent-like response
Virtual Private Cloud API	88	I'd like to retrieve the OpenVPN client configuration for a specific VPN server using the Virtual Private Cloud API. Can you help me formulate a query to achieve that?	Functionality: Retrieve client configuration Description: This request retrieves OpenVPN client configuration on a single VPN server specified by the identifier in the URL. This configuration includes directives compatible with OpenVPN releases 2.4 and 2.5 Endpoint: get_vpn_server_client_configuration API: Virtual Private Cloud API	0	-1.99645	B	hallucination: .. query ..
Virtual Private Cloud API	88	User Query: I want to download the OpenVPN client configuration for a specific VPN server using the Virtual Private Cloud API. Please help me retrieve it.	Functionality: Retrieve client configuration Description: This request retrieves OpenVPN client configuration on a single VPN server specified by the identifier in the URL. This configuration includes directives compatible with OpenVPN releases 2.4 and 2.5 Endpoint: get_vpn_server_client_configuration API: Virtual Private Cloud API	0	-2.04018	B	Bad Format: instruction is pre-pended by agent-like response
Virtual Private Cloud API	88	How do I obtain the OpenVPN client configuration from a specific VPN server using the Virtual Private Cloud API?	Functionality: Retrieve client configuration Description: This request retrieves OpenVPN client configuration on a single VPN server specified by the identifier in the URL. This configuration includes directives compatible with OpenVPN releases 2.4 and 2.5 Endpoint: get_vpn_server_client_configuration API: Virtual Private Cloud API	0	-2.07005	G
Virtual Private Cloud API	88	I'd like to obtain the OpenVPN client configuration for a specific VPN server using the Virtual Private Cloud API. How should I structure my query for that?	Functionality: Retrieve client configuration Description: This request retrieves OpenVPN client configuration on a single VPN server specified by the identifier in the URL. This configuration includes directives compatible with OpenVPN releases 2.4 and 2.5 Endpoint: get_vpn_server_client_configuration API: Virtual Private Cloud API	0	-2.02273	B	hallucination: .. query ..
Virtual Private Cloud API	89	How can I get a list of all address prefixes for a specific Virtual Private Cloud (VPC) using the Virtual Private Cloud API?	Functionality: List all address prefixes for a VPC Description: This request lists all address pool prefixes for a VPC. Endpoint: list_vpc_address_prefixes API: Virtual Private Cloud API	0	-1.64605	B	hallucination: VPC meaning is incorrect
Virtual Private Cloud API	89	I'd like to get a list of all address prefixes associated with a specific Virtual Private Cloud (VPC). How can I achieve this using the Virtual Private Cloud API?	Functionality: List all address prefixes for a VPC Description: This request lists all address pool prefixes for a VPC. Endpoint: list_vpc_address_prefixes API: Virtual Private Cloud API	0	-1.71718	B	hallucination: VPC meaning is incorrect
Virtual Private Cloud API	89	How do I obtain a list of all address prefixes associated with a specific Virtual Private Cloud using the Virtual Private Cloud API?	Functionality: List all address prefixes for a VPC Description: This request lists all address pool prefixes for a VPC. Endpoint: list_vpc_address_prefixes API: Virtual Private Cloud API	0	-1.71082	G
Virtual Private Cloud API	89	How do I retrieve a list of all address prefixes associated with a Virtual Private Cloud (VPC) using the Virtual Private Cloud API?	Functionality: List all address prefixes for a VPC Description: This request lists all address pool prefixes for a VPC. Endpoint: list_vpc_address_prefixes API: Virtual Private Cloud API	0	-1.66871	B	hallucination: VPC meaning is incorrect
Virtual Private Cloud API	89	I'd like to know how to get a list of all address prefixes associated with a Virtual Private Cloud (VPC) using the Virtual Private Cloud API.	Functionality: List all address prefixes for a VPC Description: This request lists all address pool prefixes for a VPC. Endpoint: list_vpc_address_prefixes API: Virtual Private Cloud API	0	-1.68391	B	hallucination: VPC meaning is incorrect
Virtual Private Cloud API	90	I want to know how to list all IKE policies using the Virtual Private Cloud API.	Functionality: List all IKE policies Description: This request lists all IKE policies in the region. Endpoint: list_ike_policies API: Virtual Private Cloud API	0	-1.58806	G
Virtual Private Cloud API	90	To view the list of IKE policies in my current region using the Virtual Private Cloud API, how should I craft the user query?	Functionality: List all IKE policies Description: This request lists all IKE policies in the region. Endpoint: list_ike_policies API: Virtual Private Cloud API	0	-1.49611	B	hallucination: .. query ..
Virtual Private Cloud API	90	To check and manage the IKE policies in my Virtual Private Cloud (VPC) account, may I kindly ask for an example of how to list all current IKE policies using the Virtual Private Cloud API?	Functionality: List all IKE policies Description: This request lists all IKE policies in the region. Endpoint: list_ike_policies API: Virtual Private Cloud API	0	-1.57557	B	hallucination: VPC meaning is incorrect
Virtual Private Cloud API	90	User query: "I want to view and manage all IKE policies in my Virtual Private Cloud. Can you help me achieve this using the Virtual Private Cloud API?"	Functionality: List all IKE policies Description: This request lists all IKE policies in the region. Endpoint: list_ike_policies API: Virtual Private Cloud API	0	-1.70376	B	Bad Format: instruction is pre-pended by agent-like response
Virtual Private Cloud API	90	I want to know how to view a list of all IKE policies currently available in my region using the Virtual Private Cloud API.	Functionality: List all IKE policies Description: This request lists all IKE policies in the region. Endpoint: list_ike_policies API: Virtual Private Cloud API	0	-1.50703	G
Virtual Private Cloud API	91	How can I get details of a specific bare metal server using the Virtual Private Cloud API?	Functionality: Retrieve a bare metal server Description: This request retrieves a single bare metal server specified by the identifier in the URL. Endpoint: get_bare_metal_server API: Virtual Private Cloud API	0	-1.51174	G
Virtual Private Cloud API	91	I'd like to order a new bare metal server using the Virtual Private Cloud API. Could you please help me retrieve the details of the specific server with the given identifier?	Functionality: Retrieve a bare metal server Description: This request retrieves a single bare metal server specified by the identifier in the URL. Endpoint: get_bare_metal_server API: Virtual Private Cloud API	0	-1.42157	G
Virtual Private Cloud API	91	How do I obtain the details of a particular bare metal server using the Virtual Private Cloud API?	Functionality: Retrieve a bare metal server Description: This request retrieves a single bare metal server specified by the identifier in the URL. Endpoint: get_bare_metal_server API: Virtual Private Cloud API	0	-1.52078	G
Virtual Private Cloud API	91	I'd like to request information on how to retrieve a specific bare metal server using the Virtual Private Cloud API.	Functionality: Retrieve a bare metal server Description: This request retrieves a single bare metal server specified by the identifier in the URL. Endpoint: get_bare_metal_server API: Virtual Private Cloud API	0	-1.32498	G
Virtual Private Cloud API	91	I'd like to request details about a specific bare metal server using the Virtual Private Cloud API. Can you help me retrieve the information for a bare metal server with a given identifier?	Functionality: Retrieve a bare metal server Description: This request retrieves a single bare metal server specified by the identifier in the URL. Endpoint: get_bare_metal_server API: Virtual Private Cloud API	0	-1.43772	G
Virtual Private Cloud API	92	How do I retrieve the details of a specific network ACL using the Virtual Private Cloud API?	Functionality: Retrieve a network ACL Description: This request retrieves a single network ACL specified by the identifier in the URL. Endpoint: get_network_acl API: Virtual Private Cloud API	0	-1.59538	G
Virtual Private Cloud API	92	To retrieve a specific network ACL using the Virtual Private Cloud API, you can use the following query: "I want to get the details of a particular network access control list (network ACL) in my VPC, can you help me accomplish that using the Virtual Private Cloud API?"	Functionality: Retrieve a network ACL Description: This request retrieves a single network ACL specified by the identifier in the URL. Endpoint: get_network_acl API: Virtual Private Cloud API	0	-1.44603	B	Bad Format: instruction is pre-pended by agent-like response
Virtual Private Cloud API	92	To view the details of a specific network Access Control List (ACL) using the Virtual Private Cloud API, please use the following query: "Show me how to retrieve the details of a network ACL with the provided ID using the Virtual Private Cloud API."	Functionality: Retrieve a network ACL Description: This request retrieves a single network ACL specified by the identifier in the URL. Endpoint: get_network_acl API: Virtual Private Cloud API	0	-1.62329	B	Bad Format: instruction is pre-pended by agent-like response
Virtual Private Cloud API	92	I want to retrieve specific network access control list (ACL) details using the Virtual Private Cloud API. Could you please help me construct a query for that?	Functionality: Retrieve a network ACL Description: This request retrieves a single network ACL specified by the identifier in the URL. Endpoint: get_network_acl API: Virtual Private Cloud API	0	-1.55281	B	hallucination: .. query ..
Virtual Private Cloud API	92	I'd like to retrieve the details of a specific network ACL using the Virtual Private Cloud API. Could you please help me construct a query to get that done?	Functionality: Retrieve a network ACL Description: This request retrieves a single network ACL specified by the identifier in the URL. Endpoint: get_network_acl API: Virtual Private Cloud API	0	-1.55389	B	hallucination: .. query ..
Virtual Private Cloud API	93	I'd like to create a new backup policy plan using the Virtual Private Cloud API. Can you help me with that by providing an example of how to use the create_backup_policy_plan endpoint to create a plan based on a prototype object?	Functionality: Create a plan for a backup policy Description: This request creates a new backup policy plan from a backup policy plan prototype object. The prototype object is structured in the same way as a retrieved backup policy plan, and contains the information necessary to create the new backup policy plan. Backups created by this plan will use the resource group of the source being backed …	0	-1.99687	G
Virtual Private Cloud API	93	How do I create a new backup policy plan using a prototype object with the Virtual Private Cloud API?	Functionality: Create a plan for a backup policy Description: This request creates a new backup policy plan from a backup policy plan prototype object. The prototype object is structured in the same way as a retrieved backup policy plan, and contains the information necessary to create the new backup policy plan. Backups created by this plan will use the resource group of the source being backed …	0	-2.04048	G
Virtual Private Cloud API	93	To create a backup policy plan using the Virtual Private Cloud API, please use the following query: "Could you help me create a new backup policy plan by supplying the required details as a prototype object using the 'create_backup_policy_plan' API?"	Functionality: Create a plan for a backup policy Description: This request creates a new backup policy plan from a backup policy plan prototype object. The prototype object is structured in the same way as a retrieved backup policy plan, and contains the information necessary to create the new backup policy plan. Backups created by this plan will use the resource group of the source being backed …	0	-2.00592	B	Bad Format: instruction is pre-pended by agent-like response
Virtual Private Cloud API	93	How do I create a new backup policy using a prototype and name it specifically with the Virtual Private Cloud API?	Functionality: Create a plan for a backup policy Description: This request creates a new backup policy plan from a backup policy plan prototype object. The prototype object is structured in the same way as a retrieved backup policy plan, and contains the information necessary to create the new backup policy plan. Backups created by this plan will use the resource group of the source being backed …	0	-2.34155	G
Virtual Private Cloud API	93	How do I create a new backup policy with a specific name using the Virtual Private Cloud API? Please provide me with the required details to craft a backup policy plan and create it via the API.	Functionality: Create a plan for a backup policy Description: This request creates a new backup policy plan from a backup policy plan prototype object. The prototype object is structured in the same way as a retrieved backup policy plan, and contains the information necessary to create the new backup policy plan. Backups created by this plan will use the resource group of the source being backed …	0	-2.35622	G
Virtual Private Cloud API	94	I'd like to replace the current pool members in my load balancer with new instances using the Virtual Private Cloud API. How do I format the request to achieve this using the 'replace_load_balancer_pool_members' endpoint?	Functionality: Replace load balancer pool members Description: This request replaces the existing members of the load balancer pool with new members created from the collection of member prototype objects. Endpoint: replace_load_balancer_pool_members API: Virtual Private Cloud API	0	-2.0456	B	hallucination: with new instances
Virtual Private Cloud API	94	I want to replace the current members of a load balancer pool with new instances using the Virtual Private Cloud API. How do I structure my request to accomplish this using the replace\_load\_balancer\_pool\_members function?	Functionality: Replace load balancer pool members Description: This request replaces the existing members of the load balancer pool with new members created from the collection of member prototype objects. Endpoint: replace_load_balancer_pool_members API: Virtual Private Cloud API	0	-2.05278	B	hallucination: instances instead of members
Virtual Private Cloud API	94	How do I replace the current members of a load balancer pool with new ones using the Virtual Private Cloud API?	Functionality: Replace load balancer pool members Description: This request replaces the existing members of the load balancer pool with new members created from the collection of member prototype objects. Endpoint: replace_load_balancer_pool_members API: Virtual Private Cloud API	0	-2.05434	G
Virtual Private Cloud API	94	I'd like to replace the current load balancer pool members with new instances using the Virtual Private Cloud API. Could you help me craft a query to accomplish that?	Functionality: Replace load balancer pool members Description: This request replaces the existing members of the load balancer pool with new members created from the collection of member prototype objects. Endpoint: replace_load_balancer_pool_members API: Virtual Private Cloud API	0	-2.0259	B	hallucination: instances instead of members
Virtual Private Cloud API	94	How do I replace the current load balancer pool members with new ones using the Virtual Private Cloud API?	Functionality: Replace load balancer pool members Description: This request replaces the existing members of the load balancer pool with new members created from the collection of member prototype objects. Endpoint: replace_load_balancer_pool_members API: Virtual Private Cloud API	0	-2.02399	G
Virtual Private Cloud API	95	I want to remove a specific instance group manager action using the Virtual Private Cloud API. Could you please help me construct a query to achieve this?	Functionality: Delete specified instance group manager action Description: This request deletes an instance group manager action. This operation cannot be reversed. Endpoint: delete_instance_group_manager_action API: Virtual Private Cloud API	0	-1.74447	B	hallucination: .. query ..
Virtual Private Cloud API	95	I want to remove an instance group manager action using the Virtual Private Cloud API. Can you help me construct a query to delete a specific instance group manager action?	Functionality: Delete specified instance group manager action Description: This request deletes an instance group manager action. This operation cannot be reversed. Endpoint: delete_instance_group_manager_action API: Virtual Private Cloud API	0	-1.63201	B	hallucination: .. query ..
Virtual Private Cloud API	95	How do I remove an instance group manager action using the Virtual Private Cloud API?	Functionality: Delete specified instance group manager action Description: This request deletes an instance group manager action. This operation cannot be reversed. Endpoint: delete_instance_group_manager_action API: Virtual Private Cloud API	0	-1.73522	G
Virtual Private Cloud API	95	How do I remove a specific instance group manager action utilizing the Virtual Private Cloud API?	Functionality: Delete specified instance group manager action Description: This request deletes an instance group manager action. This operation cannot be reversed. Endpoint: delete_instance_group_manager_action API: Virtual Private Cloud API	0	-1.73275	G
Virtual Private Cloud API	95	User: I have an instance group managed by the Virtual Private Cloud API and I want to remove a specific manager action. Could you help me delete that action using the API?	Functionality: Delete specified instance group manager action Description: This request deletes an instance group manager action. This operation cannot be reversed. Endpoint: delete_instance_group_manager_action API: Virtual Private Cloud API	0	-1.73551	B	bad Format: instruction is pre-pended by agent-like response
Virtual Private Cloud API	96	How do I retrieve a list of all network ACLs in my VPC using the Virtual Private Cloud API?	Functionality: List all network ACLs Description: This request lists all network ACLs in the region. A network ACL defines a set of packet filtering (5-tuple) rules for all traffic in and out of a subnet. Both allow and deny rules can be defined, and rules are stateless such that reverse traffic in response to allowed traffic is not automatically permitted. Endpoint: list_network_acls API: Virtua…	0	-1.62968	B	hallucination: VPC
Virtual Private Cloud API	96	How can I retrieve a list of all network ACLs currently configured in the region using the Virtual Private Cloud API?	Functionality: List all network ACLs Description: This request lists all network ACLs in the region. A network ACL defines a set of packet filtering (5-tuple) rules for all traffic in and out of a subnet. Both allow and deny rules can be defined, and rules are stateless such that reverse traffic in response to allowed traffic is not automatically permitted. Endpoint: list_network_acls API: Virtua…	0	-1.54131	G
Virtual Private Cloud API	96	How do I retrieve a list of all network ACLs in my current region using the Virtual Private Cloud API?	Functionality: List all network ACLs Description: This request lists all network ACLs in the region. A network ACL defines a set of packet filtering (5-tuple) rules for all traffic in and out of a subnet. Both allow and deny rules can be defined, and rules are stateless such that reverse traffic in response to allowed traffic is not automatically permitted. Endpoint: list_network_acls API: Virtua…	0	-1.55909	G
Virtual Private Cloud API	96	I'd like to retrieve a list of all network ACLs in the currentregion using the Virtual Private Cloud API. This will help me manage and configure the packet filtering rules for the subnets attached to these network ACLs.	Functionality: List all network ACLs Description: This request lists all network ACLs in the region. A network ACL defines a set of packet filtering (5-tuple) rules for all traffic in and out of a subnet. Both allow and deny rules can be defined, and rules are stateless such that reverse traffic in response to allowed traffic is not automatically permitted. Endpoint: list_network_acls API: Virtua…	0	-1.51971	G
Virtual Private Cloud API	96	"Show me how to view all the network access control lists (network ACLs) for a given region using the Virtual Private Cloud API."	Functionality: List all network ACLs Description: This request lists all network ACLs in the region. A network ACL defines a set of packet filtering (5-tuple) rules for all traffic in and out of a subnet. Both allow and deny rules can be defined, and rules are stateless such that reverse traffic in response to allowed traffic is not automatically permitted. Endpoint: list_network_acls API: Virtua…	0	-1.58536	G
Resource Manager	97	I want to create a new resource group using the Resource Manager API to better organize my account resources. How do I make a request to create a resource group with a specific name under my account?	Functionality: Create a resource group Description: Create a resource group in an account to organize your account resources in customizable groupings so that you can quickly assign users access to more than one resource at a time. To learn what makes a good resource group strategy, see [Best practices for organizing resources](https://cloud.ibm.com/docs/account?topic=account-account_setup). A de…	0	-2.00724	G
Resource Manager	97	I want to create a new resource group within my IBM Cloud account using the Resource Manager API. How can I make a request to successfully create a new resource group?	Functionality: Create a resource group Description: Create a resource group in an account to organize your account resources in customizable groupings so that you can quickly assign users access to more than one resource at a time. To learn what makes a good resource group strategy, see [Best practices for organizing resources](https://cloud.ibm.com/docs/account?topic=account-account_setup). A de…	0	-1.98589
Resource Manager	97	I'd like to create a new resource group in my IBM Cloud account using the Resource Manager API. Could you please provide guidance on how to do this and what information I should provide in the query? For example, what should be the name of the resource group, and do I need to include any specific account ID or other details?	Functionality: Create a resource group Description: Create a resource group in an account to organize your account resources in customizable groupings so that you can quickly assign users access to more than one resource at a time. To learn what makes a good resource group strategy, see [Best practices for organizing resources](https://cloud.ibm.com/docs/account?topic=account-account_setup). A de…	0	-2.03631	B	hallucination: IBM account is too specific
Resource Manager	97	I want to create a new resource group in my IBM Cloud account using the Resource Manager API. What's the correct query to format and send a request for creating a new resource group with a specific name?	Functionality: Create a resource group Description: Create a resource group in an account to organize your account resources in customizable groupings so that you can quickly assign users access to more than one resource at a time. To learn what makes a good resource group strategy, see [Best practices for organizing resources](https://cloud.ibm.com/docs/account?topic=account-account_setup). A de…	0	-2.01321	B	hallucination: IBM account is too specific
Resource Manager	97	I'd like to create a new resource group within my account utilizing the Resource Manager API. Could you please guide me through the process of creating a resource group, including its name and any necessary permissions required?	Functionality: Create a resource group Description: Create a resource group in an account to organize your account resources in customizable groupings so that you can quickly assign users access to more than one resource at a time. To learn what makes a good resource group strategy, see [Best practices for organizing resources](https://cloud.ibm.com/docs/account?topic=account-account_setup). A de…	0	-1.98674	G
IBM Cloud Open Service Broker API	98	How do I update the parameters of an existing service instance using the IBM Cloud Open Service Broker API?	Functionality: Update a service instance Description: Patch a service instance by CRN. Enabling this endpoint allows your user to change plans and service parameters in a provisioned service instance. If your offering supports multiple plans, and you want users to be able to change plans for a provisioned instance, you must enable the ability for users to update their service instance. To enable …	0	-2.04192	G
IBM Cloud Open Service Broker API	98	How do I update the parameters of an existing service instance using the IBM Cloud Open Service Broker API?	Functionality: Update a service instance Description: Patch a service instance by CRN. Enabling this endpoint allows your user to change plans and service parameters in a provisioned service instance. If your offering supports multiple plans, and you want users to be able to change plans for a provisioned instance, you must enable the ability for users to update their service instance. To enable …	0	-2.04192	G
IBM Cloud Open Service Broker API	98	How do I update the parameters of an existing service instance using the IBM Cloud Open Service Broker API?	Functionality: Update a service instance Description: Patch a service instance by CRN. Enabling this endpoint allows your user to change plans and service parameters in a provisioned service instance. If your offering supports multiple plans, and you want users to be able to change plans for a provisioned instance, you must enable the ability for users to update their service instance. To enable …	0	-2.04192	G
IBM Cloud Open Service Broker API	98	How do I update the parameters of an existing service instance using the IBM Cloud Open Service Broker API?	Functionality: Update a service instance Description: Patch a service instance by CRN. Enabling this endpoint allows your user to change plans and service parameters in a provisioned service instance. If your offering supports multiple plans, and you want users to be able to change plans for a provisioned instance, you must enable the ability for users to update their service instance. To enable …	0	-2.04192	G
IBM Cloud Open Service Broker API	98	How do I update the parameters of a provisioned service instance using the IBM Cloud Open Service Broker API?	Functionality: Update a service instance Description: Patch a service instance by CRN. Enabling this endpoint allows your user to change plans and service parameters in a provisioned service instance. If your offering supports multiple plans, and you want users to be able to change plans for a provisioned instance, you must enable the ability for users to update their service instance. To enable …	0	-2.04967	G
Metrics Routing API Version 3	99	I'd like to create a new metrics routing target using the Metrics Routing API Version 3. Could you please help me with that? I need to provide the destination details for this target, such as its name and the regions from which I want to send platform metrics. Once created, I'll be able to write my metrics to this target from multiple regions. This API allows me to define up to 16 targets per acc…	Functionality: Example request to create a metrics routing target Description: Creates a target that includes information about the destination required to write platform metrics to that target. You can send your platform metrics from all regions to a single target, different targets or multiple targets. One target per region is not required. You can define up to 16 targets per account. Endpoint:…	0	-2.08366	B	verbose
Metrics Routing API Version 3	99	I'd like to create a new metrics routing target using the Metrics Routing API Version 3. Please help me provide the necessary details to create this target, such as its destination information, to effectively write platform metrics to it. I can create multiple targets and send my metrics from all regions to them. What information do I need to include in the request to create this target?	Functionality: Example request to create a metrics routing target Description: Creates a target that includes information about the destination required to write platform metrics to that target. You can send your platform metrics from all regions to a single target, different targets or multiple targets. One target per region is not required. You can define up to 16 targets per account. Endpoint:…	0	-2.03841	B	verbose
Metrics Routing API Version 3	99	I want to create a new metrics routing target using the Metrics Routing API Version 3. This target will serve as the destination for writing platform metrics. I can send metrics from multiple regions to a single target, or to multiple targets, and I have the ability to define up to 16 targets per account. Please help me create this target with the provided API.	Functionality: Example request to create a metrics routing target Description: Creates a target that includes information about the destination required to write platform metrics to that target. You can send your platform metrics from all regions to a single target, different targets or multiple targets. One target per region is not required. You can define up to 16 targets per account. Endpoint:…	0	-2.09478	B	verbose
Metrics Routing API Version 3	99	I need to create a new metrics routing target with the Metrics Routing API Version 3, which will allow me to write platform metrics to the specified destination. I can send metrics from multiple regions to a single target, or to different targets. How do I create this new target using the API?	Functionality: Example request to create a metrics routing target Description: Creates a target that includes information about the destination required to write platform metrics to that target. You can send your platform metrics from all regions to a single target, different targets or multiple targets. One target per region is not required. You can define up to 16 targets per account. Endpoint:…	0	-2.17352	G
Metrics Routing API Version 3	99	I'd like to create a new metrics routing target with the Metrics Routing API Version 3. This target will serve as the destination for writing platform metrics. By creating this target, I can consolidate my metrics from multiple regions into a single location or distribute them among several targets. The Metrics Routing API Version 3 supports up to 16 targets per account, so I'm free to define tar…	Functionality: Example request to create a metrics routing target Description: Creates a target that includes information about the destination required to write platform metrics to that target. You can send your platform metrics from all regions to a single target, different targets or multiple targets. One target per region is not required. You can define up to 16 targets per account. Endpoint:…	0	-2.23003	B	verbose
asyncs	100	How do I retrieve the summary of the most recent async job execution using the asyncs API?	Functionality: Description: Get information of last async run Endpoint: GET_asyncs-id-summary API: asyncs	0	-2.78944	G
asyncs	100	I want to know the details of the most recent async job run. Can you help me retrieve that information using the asyncs API? Specifically, I'll be using the GET_asyncs-id-summary endpoint.	Functionality: Description: Get information of last async run Endpoint: GET_asyncs-id-summary API: asyncs	0	-2.69228	G
asyncs	100	I'd like to retrieve the summary details of the most recent asynchronous task run using the asyncs API. Can you please help me construct a query for the GET_asyncs-id-summary endpoint?	Functionality: Description: Get information of last async run Endpoint: GET_asyncs-id-summary API: asyncs	0	-2.56643	G
asyncs	100	I want to retrieve details about the most recent run of an asynchronous task using the asyncs API. Could you please help me construct a query for that with the given endpoint GET_asyncs-id-summary?	Functionality: Description: Get information of last async run Endpoint: GET_asyncs-id-summary API: asyncs	0	-2.55643	G
asyncs	100	I'd like to retrieve the summary details of the most recent async job execution. Could you please help me construct a user query for the asyncs API to accomplish this using the GET_asyncs-id-summary endpoint?	Functionality: Description: Get information of last async run Endpoint: GET_asyncs-id-summary API: asyncs	0	-2.79995	B	hallucination: .. query ..
IBM Maximo Health, Predict and HP Utilities API	101	To retrieve a (paged) list of specific MXAPIENDPOINT using IBM Maximo Health, Predict and HP Utilities API, please provide the desired filter and selection criteria in OSLC format.	Functionality: Get a (paged) collection of MXAPIENDPOINT Description: Get a (paged) collection of MXAPIENDPOINT based on the where filter (oslc.where) and select clause (oslc.select) Endpoint: API: IBM Maximo Health, Predict and HP Utilities API	0	-0.740596	B	hallucination: please provide the desired filter and selection criteria in OSLC format
IBM Maximo Health, Predict and HP Utilities API	101	To retrieve a (paged) list of specific MXAPIENDPOINTs using IBM Maximo Health, Predict and HP Utilities API, please provide the appropriate filter and selection criteria in OSLC format.	Functionality: Get a (paged) collection of MXAPIENDPOINT Description: Get a (paged) collection of MXAPIENDPOINT based on the where filter (oslc.where) and select clause (oslc.select) Endpoint: API: IBM Maximo Health, Predict and HP Utilities API	0	-0.747434	B	hallucination: please provide the desired filter and selection criteria in OSLC format
IBM Maximo Health, Predict and HP Utilities API	101	I'd like to retrieve a paged list of MXAPIENDPOINT records using the IBM Maximo Health, Predict and HP Utilities API, applying a specific filter and selection. Could you please guide me on how to do that?	Functionality: Get a (paged) collection of MXAPIENDPOINT Description: Get a (paged) collection of MXAPIENDPOINT based on the where filter (oslc.where) and select clause (oslc.select) Endpoint: API: IBM Maximo Health, Predict and HP Utilities API	0	-0.739985	G
IBM Maximo Health, Predict and HP Utilities API	101	I'd like to retrieve a (paged) list of MXAPIENDPOINT records using the IBM Maximo Health, Predict and HP Utilities API, applying the given filter and selection criteria.	Functionality: Get a (paged) collection of MXAPIENDPOINT Description: Get a (paged) collection of MXAPIENDPOINT based on the where filter (oslc.where) and select clause (oslc.select) Endpoint: API: IBM Maximo Health, Predict and HP Utilities API	0	-0.769664	B	hallucination: … applaying the given filter and selection criteria
IBM Maximo Health, Predict and HP Utilities API	101	To retrieve a (paged) list of MXAPIENDPOINT from IBM Maximo Health, Predict and HP Utilities API, please provide the desired filter and selection criteria using OSLC syntax.	Functionality: Get a (paged) collection of MXAPIENDPOINT Description: Get a (paged) collection of MXAPIENDPOINT based on the where filter (oslc.where) and select clause (oslc.select) Endpoint: API: IBM Maximo Health, Predict and HP Utilities API	0	-0.712305	B	hallucination: … please provide the desired filter and selection criteria …
Maximo RESTful API	102	How do I update the details of an mxapipergroup with the given id using the Maximo RESTful API?	Functionality: Update MXAPIPERGROUP with id {id} Description: Endpoint: API: Maximo RESTful API	0	-1.72932	G
Maximo RESTful API	102	How do I modify the details of a specific mxapipergroup using the Maximo RESTful API?	Functionality: Update MXAPIPERGROUP with id {id} Description: Endpoint: API: Maximo RESTful API	0	-1.71721	G
Maximo RESTful API	102	How do I modify the details of a specific mxapipergroup using the Maximo RESTful API?	Functionality: Update MXAPIPERGROUP with id {id} Description: Endpoint: API: Maximo RESTful API	0	-1.71721	G
Maximo RESTful API	102	How do I modify the details of an mxapipergroup with the given id using the Maximo RESTful API?	Functionality: Update MXAPIPERGROUP with id {id} Description: Endpoint: API: Maximo RESTful API	0	-1.68583	B	hallucination: .. 'with the given id' .. Id isn't provided by the user.
Maximo RESTful API	102	How do I update the details of an mxapipergroup with the given id using the Maximo RESTful API?	Functionality: Update MXAPIPERGROUP with id {id} Description: Endpoint: API: Maximo RESTful API	0	-1.72932	B	hallucination: .. 'with the given id' .. Id isn't provided by the user.
Natural Language Understanding	103	I want to remove a specific custom model using the Natural Language Understanding API. Could you guide me on how to make that deletion request?	Functionality: Example request Description: Deletes a custom model Endpoint: deleteModel API: Natural Language Understanding	0	-2.08256	G
Natural Language Understanding	103	"How do I permanently remove a specific custom model using the Natural Language Understanding API?"	Functionality: Example request Description: Deletes a custom model Endpoint: deleteModel API: Natural Language Understanding	0	-2.17366	G	minor error: instruction is between quotations
Natural Language Understanding	103	How do I remove a custom model using the Natural Language Understanding API?	Functionality: Example request Description: Deletes a custom model Endpoint: deleteModel API: Natural Language Understanding	0	-2.10596	G
Natural Language Understanding	103	I'd like to delete a specific custom model that I've created using the Natural Language Understanding API. Can you please guide me through the process?	Functionality: Example request Description: Deletes a custom model Endpoint: deleteModel API: Natural Language Understanding	0	-1.97546	G
Natural Language Understanding	103	I'd like to delete a specific custom model using Natural Language Understanding API. Could you please guide me through the process? This query demonstrates a user's need to manage custom models, a common scenario for the Natural Language Understanding API, using precise and clear language. The query directly addresses the API's functionality to delete models while also ensuring integration of the…	Functionality: Example request Description: Deletes a custom model Endpoint: deleteModel API: Natural Language Understanding	0	-1.84056	B	bad Format: instruction is pre-pended by agent-like response
IBM Cloud for VMware Shared API V2	104	How can I retrieve the list of access points for my virtual data centers in IBM Cloud for VMware Shared API V2?	Functionality: Get the list of virtual data center tenant access points Description: Virtual data center access points are associated with all virtual data center instances in the same region and define the URL for access to the vCloud Director web UI and for API calls. Endpoint: app.api.v2.locations.listing API: IBM Cloud for VMware Shared API V2	0	-0.917961	G
IBM Cloud for VMware Shared API V2	104	How do I retrieve the access points for my virtual data centers in the current region using the IBM Cloud for VMware Shared API V2?	Functionality: Get the list of virtual data center tenant access points Description: Virtual data center access points are associated with all virtual data center instances in the same region and define the URL for access to the vCloud Director web UI and for API calls. Endpoint: app.api.v2.locations.listing API: IBM Cloud for VMware Shared API V2	0	-0.924449	G
IBM Cloud for VMware Shared API V2	104	How do I retrieve the access points for all my virtual data centers in the current region using the IBM Cloud for VMware Shared API V2?	Functionality: Get the list of virtual data center tenant access points Description: Virtual data center access points are associated with all virtual data center instances in the same region and define the URL for access to the vCloud Director web UI and for API calls. Endpoint: app.api.v2.locations.listing API: IBM Cloud for VMware Shared API V2	0	-0.907135	G
IBM Cloud for VMware Shared API V2	104	How do I retrieve a list of access points for my virtual data centers using the IBM Cloud for VMware Shared API V2?	Functionality: Get the list of virtual data center tenant access points Description: Virtual data center access points are associated with all virtual data center instances in the same region and define the URL for access to the vCloud Director web UI and for API calls. Endpoint: app.api.v2.locations.listing API: IBM Cloud for VMware Shared API V2	0	-0.942491	G
IBM Cloud for VMware Shared API V2	104	How do I retrieve the URLs for accessing the vCloud Director web UI and APIs for all my virtual data centers in a specific region using the IBM Cloud for VMware Shared API V2?	Functionality: Get the list of virtual data center tenant access points Description: Virtual data center access points are associated with all virtual data center instances in the same region and define the URL for access to the vCloud Director web UI and for API calls. Endpoint: app.api.v2.locations.listing API: IBM Cloud for VMware Shared API V2	0	-0.927186	B	cannot determine accuracy
COS Resource Configuration API	105	How do I modify the IP access filter for a specific COS (Cloud Object Storage) bucket using the COS Resource Configuration API?	Functionality: Make changes to a bucket's configuration. Description: Updates a bucket using [JSON Merge Patch](https://tools.ietf.org/html/rfc7396). This request is used to add functionality (like an IP access filter) or to update existing parameters. **Primitives are overwritten and replaced in their entirety. It is not possible to append a new (or to delete a specific) value to an array.** Arr…	0	-0.54592	G
COS Resource Configuration API	105	How do I update specific settings in my COS bucket using JSON Merge Patch with the COS Resource Configuration API?	Functionality: Make changes to a bucket's configuration. Description: Updates a bucket using [JSON Merge Patch](https://tools.ietf.org/html/rfc7396). This request is used to add functionality (like an IP access filter) or to update existing parameters. **Primitives are overwritten and replaced in their entirety. It is not possible to append a new (or to delete a specific) value to an array.** Arr…	0	-0.434827	G
COS Resource Configuration API	105	How do I modify specific settings for my COS bucket using JSON Merge Patch in the COS Resource Configuration API?	Functionality: Make changes to a bucket's configuration. Description: Updates a bucket using [JSON Merge Patch](https://tools.ietf.org/html/rfc7396). This request is used to add functionality (like an IP access filter) or to update existing parameters. **Primitives are overwritten and replaced in their entirety. It is not possible to append a new (or to delete a specific) value to an array.** Arr…	0	-0.43841	G
COS Resource Configuration API	105	How do I modify specific settings in my COS bucket using the COS Resource Configuration API and JSON Merge Patch? For instance, I'd like to add a new IP address to an existing IP access list or change the bucket encryption setting for new objects.	Functionality: Make changes to a bucket's configuration. Description: Updates a bucket using [JSON Merge Patch](https://tools.ietf.org/html/rfc7396). This request is used to add functionality (like an IP access filter) or to update existing parameters. **Primitives are overwritten and replaced in their entirety. It is not possible to append a new (or to delete a specific) value to an array.** Arr…	0	-0.462711	B	hallucination: encryption setting
COS Resource Configuration API	105	How can I modify specific settings in my COS bucket using JSON Merge Patch with the COS Resource Configuration API? For example, how do I add a new IP access filter or update an existing one?	Functionality: Make changes to a bucket's configuration. Description: Updates a bucket using [JSON Merge Patch](https://tools.ietf.org/html/rfc7396). This request is used to add functionality (like an IP access filter) or to update existing parameters. **Primitives are overwritten and replaced in their entirety. It is not possible to append a new (or to delete a specific) value to an array.** Arr…	0	-0.424747	G
IBM Event Streams REST Producer v2 endpoint	106	"How do I send a message with headers, keys, and values to a specific topic using IBM Event Streams REST Producer v2 API?"	Functionality: Produce a message to a topic in IBM Event Streams. Description: Produce a message to a topic in IBM Event Streams. Messages can include headers, keys and values. If required, an Avro schema can be specified for keys and values. Endpoint: produceMessage API: IBM Event Streams REST Producer v2 endpoint	0	-0.956932	G	minor error: instruction is between quotations
IBM Event Streams REST Producer v2 endpoint	106	"How do I send a message with headers, keys, and values to a specific topic in IBM Event Streams using the IBM Event Streams REST Producer v2 API?"	Functionality: Produce a message to a topic in IBM Event Streams. Description: Produce a message to a topic in IBM Event Streams. Messages can include headers, keys and values. If required, an Avro schema can be specified for keys and values. Endpoint: produceMessage API: IBM Event Streams REST Producer v2 endpoint	0	-0.988775	G	minor error: instruction is between quotations
IBM Event Streams REST Producer v2 endpoint	106	"I'd like to send a message with headers, keys, and values to a specific topic in IBM Event Streams. Using the IBM Event Streams REST Producer v2 API, how would I format and submit this message including any required Avro schema?"	Functionality: Produce a message to a topic in IBM Event Streams. Description: Produce a message to a topic in IBM Event Streams. Messages can include headers, keys and values. If required, an Avro schema can be specified for keys and values. Endpoint: produceMessage API: IBM Event Streams REST Producer v2 endpoint	0	-1.01609	G	minor error: instruction is between quotations
IBM Event Streams REST Producer v2 endpoint	106	How to send a message with headers, keys, and values to a specific topic using IBM Event Streams REST Producer v2 API?	Functionality: Produce a message to a topic in IBM Event Streams. Description: Produce a message to a topic in IBM Event Streams. Messages can include headers, keys and values. If required, an Avro schema can be specified for keys and values. Endpoint: produceMessage API: IBM Event Streams REST Producer v2 endpoint	0	-0.936895	G
IBM Event Streams REST Producer v2 endpoint	106	How can I send a message with headers, keys, and values to a specific topic using IBM Event Streams REST Producer v2?	Functionality: Produce a message to a topic in IBM Event Streams. Description: Produce a message to a topic in IBM Event Streams. Messages can include headers, keys and values. If required, an Avro schema can be specified for keys and values. Endpoint: produceMessage API: IBM Event Streams REST Producer v2 endpoint	0	-0.923134	G
Isoline Routing API v8	107	Hey, I'd like to find the reachable areas around a specific center point using precise coordinates, constrained by a certain range. How do I achieve this with the Isoline Routing API v8? Could you please give me an example of a query to get the isolines for those parameters?	Functionality: Get Isolines for specified ranges around a center point Description: Retrieves a list of polylines that captures the approximate reachable area from the specified center point constrained by the provided parameters. Endpoint: getIsolines API: Isoline Routing API v8	0	-0.878313	B	hallucination: .. query ..
Isoline Routing API v8	107	"How can I use the Isoline Routing API v8 to get a list of polylines representing the reachable area around a specified center point with defined parameters?"	Functionality: Get Isolines for specified ranges around a center point Description: Retrieves a list of polylines that captures the approximate reachable area from the specified center point constrained by the provided parameters. Endpoint: getIsolines API: Isoline Routing API v8	0	-0.892179	G
Isoline Routing API v8	107	Hey, I need to find the approximate reachable area around a specific location using Isoline Routing API v8. Can you help me construct a query to retrieve a list of polylines as isolines for specified ranges around that center point?	Functionality: Get Isolines for specified ranges around a center point Description: Retrieves a list of polylines that captures the approximate reachable area from the specified center point constrained by the provided parameters. Endpoint: getIsolines API: Isoline Routing API v8	0	-0.809345	B	hallucination: .. query ..
Isoline Routing API v8	107	Hey, I need to find out how to get approximate reachable areas around a specific center point using the Isoline Routing API v8. Could you please show me how I can retrieve a list of polylines representing the isolines for specified ranges with this API?	Functionality: Get Isolines for specified ranges around a center point Description: Retrieves a list of polylines that captures the approximate reachable area from the specified center point constrained by the provided parameters. Endpoint: getIsolines API: Isoline Routing API v8	0	-0.822839	G
Isoline Routing API v8	107	"I need to find out the approximate reachable area from a certain center point using Isoline Routing API v8. Can you please provide me with the isolines for specified ranges around that center point?"	Functionality: Get Isolines for specified ranges around a center point Description: Retrieves a list of polylines that captures the approximate reachable area from the specified center point constrained by the provided parameters. Endpoint: getIsolines API: Isoline Routing API v8	0	-0.824285	G
Watson Assistant v1	108	I want to remove a specific value from an entity using the IBM Watson Assistant v1. Please help me craft a query to achieve that.	Functionality: Example request for IBM Cloud Pak for Data Description: Delete a value from an entity. Endpoint: deleteValue API: Watson Assistant v1	0	-1.60361	B	hallucination: .. query ..
Watson Assistant v1	108	I want to remove a specific value from an entity using the IBM Watson Assistant v1. Please assist me in deleting that value.	Functionality: Example request for IBM Cloud Pak for Data Description: Delete a value from an entity. Endpoint: deleteValue API: Watson Assistant v1	0	-1.53438	G
Watson Assistant v1	108	I want to remove a specific value associated with an entity using the IBM Watson Assistant v1. Could you please help me delete that value?	Functionality: Example request for IBM Cloud Pak for Data Description: Delete a value from an entity. Endpoint: deleteValue API: Watson Assistant v1	0	-1.5421	G
Watson Assistant v1	108	I want to remove a particular value associated with an entity using the IBM Watson Assistant v1. Please help me formulate a query to achieve that.	Functionality: Example request for IBM Cloud Pak for Data Description: Delete a value from an entity. Endpoint: deleteValue API: Watson Assistant v1	0	-1.55262	B	hallucination: .. query ..
Watson Assistant v1	108	I want to remove a specific value associated with an entity using the IBM Watson Assistant v1 API. Could you please help me delete that value?	Functionality: Example request for IBM Cloud Pak for Data Description: Delete a value from an entity. Endpoint: deleteValue API: Watson Assistant v1	0	-1.51798	G
Watson Assistant v1	109	I want to update the text of a counterexample in my Watson Assistant v1. Please help me with that.	Functionality: Example request for IBM Cloud Pak for Data Description: Update the text of a counterexample. Counterexamples are examples that have been marked as irrelevant input. Endpoint: updateCounterexample API: Watson Assistant v1	0	-1.59105	G
Watson Assistant v1	109	I want to update the text of a counterexample in my Watson Assistant v1 workspace. Please help me construct a query to achieve that.	Functionality: Example request for IBM Cloud Pak for Data Description: Update the text of a counterexample. Counterexamples are examples that have been marked as irrelevant input. Endpoint: updateCounterexample API: Watson Assistant v1	0	-1.58041	B	hallucination: .. query ..
Watson Assistant v1	109	I want to update the text of a counterexample in my assistant using the IBM Watson Assistant v1 API. Please help me with that.	Functionality: Example request for IBM Cloud Pak for Data Description: Update the text of a counterexample. Counterexamples are examples that have been marked as irrelevant input. Endpoint: updateCounterexample API: Watson Assistant v1	0	-1.62295	G
Watson Assistant v1	109	I want to update the text of a counterexample in my Watson Assistant v1 workspace. Please help me construct a query to do that.	Functionality: Example request for IBM Cloud Pak for Data Description: Update the text of a counterexample. Counterexamples are examples that have been marked as irrelevant input. Endpoint: updateCounterexample API: Watson Assistant v1	0	-1.58805	B	hallucination: .. query ..
Watson Assistant v1	109	I want to update the text of a counterexample in my IBM Cloud Pak for Data instance using the Watson Assistant v1 API. Please help me construct a query to do this.	Functionality: Example request for IBM Cloud Pak for Data Description: Update the text of a counterexample. Counterexamples are examples that have been marked as irrelevant input. Endpoint: updateCounterexample API: Watson Assistant v1	0	-1.53238	B	hallucination: .. query .. Instance
Matrix Routing API v8	110	How can I retrieve the details of a specific profile using the Matrix Routing API v8?	Functionality: Get profile definition by its ID. Description: Endpoint: getProfile API: Matrix Routing API v8	0	-2.73661	G
Matrix Routing API v8	110	How do I retrieve the details of a specific profile using the Matrix Routing API v8?	Functionality: Get profile definition by its ID. Description: Endpoint: getProfile API: Matrix Routing API v8	0	-2.74595	G
Matrix Routing API v8	110	How do I retrieve the details of a specific Matrix Routing API v8 profile using its unique ID by making a call to the getProfile endpoint?	Functionality: Get profile definition by its ID. Description: Endpoint: getProfile API: Matrix Routing API v8	0	-2.75666	G
Matrix Routing API v8	110	How can I retrieve the details of a specific profile using the Matrix Routing API v8? I need to get the definition for a particular profile ID.	Functionality: Get profile definition by its ID. Description: Endpoint: getProfile API: Matrix Routing API v8	0	-2.34861	G
Matrix Routing API v8	110	How do I retrieve the specific profile definition using its ID with the Matrix Routing API v8?	Functionality: Get profile definition by its ID. Description: Endpoint: getProfile API: Matrix Routing API v8	0	-2.16068	G
IBM Cloud Object Storage S3 API	111	How do I retrieve a list of up to 1,000 objects in a bucket using the IBM Cloud Object Storage S3 API?	Functionality: List objects in a bucket (v1) Description: Returns some or all (up to 1,000) of the objects in a bucket. You can use the request parameters as selection criteria to return a subset of the objects in a bucket. A `200 OK` response can contain valid or invalid XML. Make sure to design your application to parse the contents of the response and handle it appropriately. This version (v1)…	0	-2.12931	G
IBM Cloud Object Storage S3 API	111	How do I retrieve a list of up to 1,000 objects in a bucket using the IBM Cloud Object Storage S3 API?	Functionality: List objects in a bucket (v1) Description: Returns some or all (up to 1,000) of the objects in a bucket. You can use the request parameters as selection criteria to return a subset of the objects in a bucket. A `200 OK` response can contain valid or invalid XML. Make sure to design your application to parse the contents of the response and handle it appropriately. This version (v1)…	0	-2.12931	G
IBM Cloud Object Storage S3 API	111	How do I retrieve a list of up to 1,000 objects in a bucket using the IBM Cloud Object Storage S3 API?	Functionality: List objects in a bucket (v1) Description: Returns some or all (up to 1,000) of the objects in a bucket. You can use the request parameters as selection criteria to return a subset of the objects in a bucket. A `200 OK` response can contain valid or invalid XML. Make sure to design your application to parse the contents of the response and handle it appropriately. This version (v1)…	0	-2.12931	G
IBM Cloud Object Storage S3 API	111	How do I retrieve a list of up to 1,000 objects in a bucket using the IBM Cloud Object Storage S3 API?	Functionality: List objects in a bucket (v1) Description: Returns some or all (up to 1,000) of the objects in a bucket. You can use the request parameters as selection criteria to return a subset of the objects in a bucket. A `200 OK` response can contain valid or invalid XML. Make sure to design your application to parse the contents of the response and handle it appropriately. This version (v1)…	0	-2.12931	G
IBM Cloud Object Storage S3 API	111	How do I retrieve a list of up to 1,000 objects in a bucket using the IBM Cloud Object Storage S3 API?	Functionality: List objects in a bucket (v1) Description: Returns some or all (up to 1,000) of the objects in a bucket. You can use the request parameters as selection criteria to return a subset of the objects in a bucket. A `200 OK` response can contain valid or invalid XML. Make sure to design your application to parse the contents of the response and handle it appropriately. This version (v1)…	0	-2.12931	G
AI Factsheets API	112	"Could you help me remove the association between a specific model and model entry using the AI Factsheets API?"	Functionality: Unlink Model to Model Entry Description: Unlink Model to Model Entry Endpoint: unlinkModelEntryWithModel API: AI Factsheets API	0	-1.82873	G	minor error: instruction is between quotations
AI Factsheets API	112	How do I remove the association between a specific model and a model entry using the AI Factsheets API?	Functionality: Unlink Model to Model Entry Description: Unlink Model to Model Entry Endpoint: unlinkModelEntryWithModel API: AI Factsheets API	0	-1.82599	G
AI Factsheets API	112	How do I use the AI Factsheets API to separate a specific model from a connected model entry? I need to unlink them.	Functionality: Unlink Model to Model Entry Description: Unlink Model to Model Entry Endpoint: unlinkModelEntryWithModel API: AI Factsheets API	0	-1.79813	G
AI Factsheets API	112	"How do I use the AI Factsheets API to remove a linked model from a specific model entry?"	Functionality: Unlink Model to Model Entry Description: Unlink Model to Model Entry Endpoint: unlinkModelEntryWithModel API: AI Factsheets API	0	-1.98541	G	minor error: instruction is between quotations
AI Factsheets API	112	"How do I remove a model association with a model entry using the AI Factsheets API?"	Functionality: Unlink Model to Model Entry Description: Unlink Model to Model Entry Endpoint: unlinkModelEntryWithModel API: AI Factsheets API	0	-1.9169	G	minor error: instruction is between quotations
AI Factsheets API	113	I'd like to update the status value of a specific ModelEntry using the AI Factsheets API. How do I proceed with that?	Functionality: Update Status value of ModelEntry Description: Updates Status value of ModelEntry Endpoint: updateModelEntryStatus API: AI Factsheets API	0	-1.99186	G
AI Factsheets API	113	How do I change the status of a specific ModelEntry using the AI Factsheets API?	Functionality: Update Status value of ModelEntry Description: Updates Status value of ModelEntry Endpoint: updateModelEntryStatus API: AI Factsheets API	0	-2.37706	G
AI Factsheets API	113	How do I update the status of a specific ModelEntry using the AI Factsheets API?	Functionality: Update Status value of ModelEntry Description: Updates Status value of ModelEntry Endpoint: updateModelEntryStatus API: AI Factsheets API	0	-2.38272	G
AI Factsheets API	113	"How do I update the status of a ModelEntry using the AI Factsheets API?"	Functionality: Update Status value of ModelEntry Description: Updates Status value of ModelEntry Endpoint: updateModelEntryStatus API: AI Factsheets API	0	-2.35032	G	minor error: instruction is between quotations
AI Factsheets API	113	"How do I update the status of a ModelEntry using the AI Factsheets API?"	Functionality: Update Status value of ModelEntry Description: Updates Status value of ModelEntry Endpoint: updateModelEntryStatus API: AI Factsheets API	0	-2.35032	G	minor error: instruction is between quotations
AI Factsheets API	114	How do I retrieve the details of a specific report template using the AI Factsheets API?	Functionality: Get specific report template detail Description: Returns specified template id detail Endpoint: getTemplateDetail API: AI Factsheets API	0	-2.8224	G
AI Factsheets API	114	How do I retrieve the details of a specific report template using the AI Factsheets API?	Functionality: Get specific report template detail Description: Returns specified template id detail Endpoint: getTemplateDetail API: AI Factsheets API	0	-2.8224	G
AI Factsheets API	114	How do I retrieve the details of a particular report template using the AI Factsheets API?	Functionality: Get specific report template detail Description: Returns specified template id detail Endpoint: getTemplateDetail API: AI Factsheets API	0	-2.84464	G
AI Factsheets API	114	How can I retrieve specific report template details using the AI Factsheets API?	Functionality: Get specific report template detail Description: Returns specified template id detail Endpoint: getTemplateDetail API: AI Factsheets API	0	-2.74733	G
IBM Open Data for Industries	115	I'd like to check the current status of the Wellbore DDMS service using IBM Open Data for Industries. How can I do that?	Functionality: Get the status of the Wellbore DDMS service Description: Endpoint: about_ddms_v2_status_get API: IBM Open Data for Industries	0	-1.84622	G
IBM Open Data for Industries	115	I'd like to check the current status of the IBM Open Data for Industries Wellbore DDMS service. How do I go about doing that?	Functionality: Get the status of the Wellbore DDMS service Description: Endpoint: about_ddms_v2_status_get API: IBM Open Data for Industries	0	-1.93766	G
IBM Open Data for Industries	115	I'd like to know how to check the current status of the Wellbore DDMS service using IBM Open Data for Industries.	Functionality: Get the status of the Wellbore DDMS service Description: Endpoint: about_ddms_v2_status_get API: IBM Open Data for Industries	0	-1.88693	G
IBM Open Data for Industries	115	I want to check the current status of the Wellbore DDMS service using IBM Open Data for Industries.	Functionality: Get the status of the Wellbore DDMS service Description: Endpoint: about_ddms_v2_status_get API: IBM Open Data for Industries	0	-1.88986	G
IBM Open Data for Industries	115	What's the current status of the Wellbore DDMS service using the IBM Open Data for Industries API?	Functionality: Get the status of the Wellbore DDMS service Description: Endpoint: about_ddms_v2_status_get API: IBM Open Data for Industries	0	-1.95516	G
Log Analysis API	116	I'd like to see the aggregated usage information for all my applications within a specific time frame using the Log Analysis API. Could you help me with that?	Functionality: List Usage By App Description: Lists aggregated usage information for all apps during a time period. Endpoint: list-usage-app API: Log Analysis API	0	-2.15441	G
Log Analysis API	116	To see a comprehensive list of usage statistics for all applications within a specific time frame using the Log Analysis API, please utilize the following query: "Show me how to retrieve aggregated usage information for all apps with the Log Analysis API."	Functionality: List Usage By App Description: Lists aggregated usage information for all apps during a time period. Endpoint: list-usage-app API: Log Analysis API	0	-1.99003	B	bad Format: instruction is pre-pended by agent-like response
Log Analysis API	116	To see a summary of the usage statistics for all applications within a given time frame using the Log Analysis API, you can utilize the following user query: "Show me the aggregated usage statistics for all applications with the Log Analysis API."	Functionality: List Usage By App Description: Lists aggregated usage information for all apps during a time period. Endpoint: list-usage-app API: Log Analysis API	0	-2.2239	B	bad Format: instruction is pre-pended by agent-like response
Log Analysis API	116	Could you please help me retrieve the aggregated usage information for all applications within a specified time frame using the Log Analysis API?	Functionality: List Usage By App Description: Lists aggregated usage information for all apps during a time period. Endpoint: list-usage-app API: Log Analysis API	0	-2.18416	G
Log Analysis API	116	To see the aggregated usage information for all apps within a specific time frame using the Log Analysis API, you can execute the following query: "Show me the usage statistics for all apps within the last 7 days using the Log Analysis API."	Functionality: List Usage By App Description: Lists aggregated usage information for all apps during a time period. Endpoint: list-usage-app API: Log Analysis API	0	-1.86446	B	bad Format: instruction is pre-pended by agent-like response
Log Analysis API	117	To confirm an ingestion suspension using the Log Analysis API, please follow these steps: 1. After suspending log ingestion by sending a request to /v1-config/ingestion/suspend, take note of the returned token. 2. Use the token to confirm the ingestion suspension by making a POST request to /v1-config-ingestion-suspend-confirm. Example query: I'd like to confirm that log ingestion has been suspen…	Functionality: Confirm Ingestion Suspension Description: After /suspend is called, a token is returned for use with this route as a confirmation. Endpoint: post-v1-config-ingestion-suspend-confirm API: Log Analysis API	0	-1.95248	B	bad Format: instruction is pre-pended by agent-like response
Log Analysis API	117	After suspending log ingestion using the Log Analysis API, how do I confirm the suspension with a token?	Functionality: Confirm Ingestion Suspension Description: After /suspend is called, a token is returned for use with this route as a confirmation. Endpoint: post-v1-config-ingestion-suspend-confirm API: Log Analysis API	0	-2.33088	G
Log Analysis API	117	To confirm the ingestion suspension previously initiated with the Log Analysis API, please enter the following query: "How do I use the Log Analysis API to verify the status of a recently initiated ingestion suspension?"	Functionality: Confirm Ingestion Suspension Description: After /suspend is called, a token is returned for use with this route as a confirmation. Endpoint: post-v1-config-ingestion-suspend-confirm API: Log Analysis API	0	-2.53869	B	bad Format: instruction is pre-pended by agent-like response
Log Analysis API	117	After suspending the ingestion of logs using the Log Analysis API with the endpoint "/post-v1-config-ingestion-suspend", I would like to confirm this action. Could you please provide me with the necessary steps or query to use with the "/post-v1-config-ingestion-suspend-confirm" endpoint to confirm the ingestion suspension?	Functionality: Confirm Ingestion Suspension Description: After /suspend is called, a token is returned for use with this route as a confirmation. Endpoint: post-v1-config-ingestion-suspend-confirm API: Log Analysis API	0	-2.19041	B	hallucination: first endpoint might not exist
Log Analysis API	117	After suspending ingestion using the Log Analysis API, I need to confirm the action by making a POST request to the suspending confirmation endpoint. Can you help me with that using the returned token?	Functionality: Confirm Ingestion Suspension Description: After /suspend is called, a token is returned for use with this route as a confirmation. Endpoint: post-v1-config-ingestion-suspend-confirm API: Log Analysis API	0	-2.07311	G
Log Analysis API	118	I'd like to know how to export specific log lines in JSON format using the Log Analysis API. Can you please guide me through the process?	Functionality: Export log lines Description: Use this method to export logs in JSON format from a logging instance. Endpoint: export API: Log Analysis API	0	-2.23733	G
Log Analysis API	118	How can I export log data in JSON format from the Log Analysis API?	Functionality: Export log lines Description: Use this method to export logs in JSON format from a logging instance. Endpoint: export API: Log Analysis API	0	-2.44496	B	hallucination: from the Log Analysis API
Log Analysis API	118	How do I export log lines in JSON format using the Log Analysis API?	Functionality: Export log lines Description: Use this method to export logs in JSON format from a logging instance. Endpoint: export API: Log Analysis API	0	-2.05229	G
Log Analysis API	118	To export log lines in JSON format from a logging instance using the Log Analysis API, you can use the following query: "Export the log data in JSON format for a specific logging instance with the Log Analysis API." Or, "I want to export log lines as a JSON file from my logging instance using the Log Analysis API."	Functionality: Export log lines Description: Use this method to export logs in JSON format from a logging instance. Endpoint: export API: Log Analysis API	0	-1.67769	B	bad Format: instruction is pre-pended by agent-like response
Log Analysis API	118	How do I export logs in JSON format from the Log Analysis API?	Functionality: Export log lines Description: Use this method to export logs in JSON format from a logging instance. Endpoint: export API: Log Analysis API	0	-2.40059	G
Log Analysis API	119	I'd like to delete a specific preset alert configuration using the Log Analysis API. Could you kindly guide me through the process?	Functionality: Example Request Description: Use this method to delete a preset alert. Endpoint: delete-alert API: Log Analysis API	0	-1.90094	G
Log Analysis API	119	How can I utilize the Log Analysis API to remove a preset alert?	Functionality: Example Request Description: Use this method to delete a preset alert. Endpoint: delete-alert API: Log Analysis API	0	-1.83546	G
Log Analysis API	119	To remove a specific preset alert using theLog Analysis API, kindly provide the name or ID of the alert you wish to delete. Here's an example query: "How do I delete a preset alert named 'HighErrorRate' using the Log Analysis API?"	Functionality: Example Request Description: Use this method to delete a preset alert. Endpoint: delete-alert API: Log Analysis API	0	-1.58983	B	bad Format: instruction is pre-pended by agent-like response
Log Analysis API	119	To delete a pesky, predefined alert using the Log Analysis API, kindly provide me with the alert name you'd like to eliminate. Once you've done that, I'll guide you through the process. Happy logging!	Functionality: Example Request Description: Use this method to delete a preset alert. Endpoint: delete-alert API: Log Analysis API	0	-1.96325	B	bad Format: instruction is pre-pended by agent-like response
Log Analysis API	119	I'd like to delete an existing preset alert using the Log Analysis API. How can I accomplish that accurately and efficiently?	Functionality: Example Request Description: Use this method to delete a preset alert. Endpoint: delete-alert API: Log Analysis API	0	-1.78509	G
Log Analysis API	120	I'd like to know how to retrieve detailed information about a specific group using the Log Analysis API.	Functionality: Example Request Description: Use this method to get information on a group. Endpoint: read-group API: Log Analysis API	0	-2.56642	G
Log Analysis API	120	I want to retrieve information about a specific group using the Log Analysis API. Please guide me on how to construct the query to achieve this.	Functionality: Example Request Description: Use this method to get information on a group. Endpoint: read-group API: Log Analysis API	0	-2.49369	G
Log Analysis API	120	To check details about a specific group using the Log Analysis API, kindly provide the group name: "What information can I get about a particular group using the Log Analysis API?" or "I need to retrieve details for a group named '[Group Name]' with the Log Analysis API. How can I do that?"	Functionality: Example Request Description: Use this method to get information on a group. Endpoint: read-group API: Log Analysis API	0	-2.30357	B	bad Format: instruction is pre-pended by agent-like response
Log Analysis API	120	"How do I retrieve details about a specific group using the Log Analysis API?"	Functionality: Example Request Description: Use this method to get information on a group. Endpoint: read-group API: Log Analysis API	0	-2.5794	G	minor error: instruction is between quotations
Log Analysis API	120	How do I retrieve detailed information about a specific group using the Log Analysis API?	Functionality: Example Request Description: Use this method to get information on a group. Endpoint: read-group API: Log Analysis API	0	-2.66134	G
Schematics Service API	121	I want to fetch the detailed information of a specific action, including its log file URL, using the Schematics Service API. Please help me use the get_action endpoint for that.	Functionality: Example request to fetch the action details of the specific action ID Description: Retrieve the detailed information of an actions from your IBM Cloud account. This API returns a URL to the log file that you can retrieve by using the `GET /v2/actions/{action_id}/logs` API. <h3>Authorization</h3> Schematics support generic authorization for its resources. For more information, about…	0	-1.25447	G
Schematics Service API	121	I want to retrieve detailed information about a specific action, including its log file URL, using the Schematics Service API. Please help me construct the query to do that.	Functionality: Example request to fetch the action details of the specific action ID Description: Retrieve the detailed information of an actions from your IBM Cloud account. This API returns a URL to the log file that you can retrieve by using the `GET /v2/actions/{action_id}/logs` API. <h3>Authorization</h3> Schematics support generic authorization for its resources. For more information, about…	0	-1.25724	G
Schematics Service API	121	I'd like to request details about a specific action using the Schematics Service API. Could you help me fetch the information related to that action's ID? The API response will provide me with a URL to access the action's log file.	Functionality: Example request to fetch the action details of the specific action ID Description: Retrieve the detailed information of an actions from your IBM Cloud account. This API returns a URL to the log file that you can retrieve by using the `GET /v2/actions/{action_id}/logs` API. <h3>Authorization</h3> Schematics support generic authorization for its resources. For more information, about…	0	-1.22338	G
Schematics Service API	121	I'd like to retrieved the detailed information for a specific action using the Schematics Service API. Once I have the action details, please show me how to obtain the URL to the action's log file.	Functionality: Example request to fetch the action details of the specific action ID Description: Retrieve the detailed information of an actions from your IBM Cloud account. This API returns a URL to the log file that you can retrieve by using the `GET /v2/actions/{action_id}/logs` API. <h3>Authorization</h3> Schematics support generic authorization for its resources. For more information, about…	0	-1.27026	G
Schematics Service API	121	I want to retrieve the detailed information about a specific action along with the log file URL using the get_action endpoint from the Schematics Service API. Can you help me accomplish that?	Functionality: Example request to fetch the action details of the specific action ID Description: Retrieve the detailed information of an actions from your IBM Cloud account. This API returns a URL to the log file that you can retrieve by using the `GET /v2/actions/{action_id}/logs` API. <h3>Authorization</h3> Schematics support generic authorization for its resources. For more information, about…	0	-1.31836	G
Schematics Service API	122	I'd like to delete a Schematics workspace using the Schematics Service API. Please guide me through the process of initiating a workspace deletion job.	Functionality: Example request to initiate the workspace deletion. Description: Delete one or multiple Schematics workspace. Deleting a workspace does not destroy the resources from the Schematics workspace. <h3>Authorization</h3> Schematics support generic authorization for its resources. For more information, about Schematics access and permissions, see [Schematics service access roles and requ…	0	-1.03095	G
Schematics Service API	122	I'd like to request the deletion of my Schematics workspace using the Schematics Service API. Can you help me initiate a workspace deletion job with the create\_workspace\_deletion\_job endpoint?	Functionality: Example request to initiate the workspace deletion. Description: Delete one or multiple Schematics workspace. Deleting a workspace does not destroy the resources from the Schematics workspace. <h3>Authorization</h3> Schematics support generic authorization for its resources. For more information, about Schematics access and permissions, see [Schematics service access roles and requ…	0	-0.993936
Schematics Service API	122	I want to delete a Schematics workspace using the Schematics Service API. Please help me initiate the workspace deletion job with the provided API.	Functionality: Example request to initiate the workspace deletion. Description: Delete one or multiple Schematics workspace. Deleting a workspace does not destroy the resources from the Schematics workspace. <h3>Authorization</h3> Schematics support generic authorization for its resources. For more information, about Schematics access and permissions, see [Schematics service access roles and requ…	0	-1.03704
Schematics Service API	122	I'd like to delete a Schematics workspace using the Schematics Service API. Please guide me through initiating workspace deletion with the create\_workspace\_deletion\_job endpoint.	Functionality: Example request to initiate the workspace deletion. Description: Delete one or multiple Schematics workspace. Deleting a workspace does not destroy the resources from the Schematics workspace. <h3>Authorization</h3> Schematics support generic authorization for its resources. For more information, about Schematics access and permissions, see [Schematics service access roles and requ…	0	-0.998234
Schematics Service API	122	I want to delete a Schematics workspace using the Schematics Service API. Please help me initiate the workspace deletion process.	Functionality: Example request to initiate the workspace deletion. Description: Delete one or multiple Schematics workspace. Deleting a workspace does not destroy the resources from the Schematics workspace. <h3>Authorization</h3> Schematics support generic authorization for its resources. For more information, about Schematics access and permissions, see [Schematics service access roles and requ…	0	-1.04687
Schematics Service API	123	I'd like to update the resource query definition for my Schematics Action using the replace_resources_query endpoint of the Schematics Service API. Please guide me through the process. Keep in mind that I cannot modify the location, region, or resource group after a resource query is created, and ensure my IP addresses are included in the allowlist.	Functionality: Example request to replace a resource query. Description: Use this API to update the resource query definition used to build the dynamic inventory for the Schematics Action. For more information, about resource query commands, refer to [ibmcloud schematics resource query update](https://cloud.ibm.com/docs/schematics?topic=schematics-schematics-cli-reference#schematics-update-rq). *…	0	-1.12041
Schematics Service API	123	I want to update the resource query definition for my Schematics Action using the replace_resources_query API in the Schematics Service API. Can you guide me through the process? Note that I cannot change the location, region, or resource group of a resource query once it's been created, and make sure my IP addresses are allowed.	Functionality: Example request to replace a resource query. Description: Use this API to update the resource query definition used to build the dynamic inventory for the Schematics Action. For more information, about resource query commands, refer to [ibmcloud schematics resource query update](https://cloud.ibm.com/docs/schematics?topic=schematics-schematics-cli-reference#schematics-update-rq). *…	0	-1.1479
Schematics Service API	123	I want to update the resource query definition in my Schematics Action with the Schematics Service API. Please guide me on how to use the replace\_resources\_query endpoint to accomplish this task.	Functionality: Example request to replace a resource query. Description: Use this API to update the resource query definition used to build the dynamic inventory for the Schematics Action. For more information, about resource query commands, refer to [ibmcloud schematics resource query update](https://cloud.ibm.com/docs/schematics?topic=schematics-schematics-cli-reference#schematics-update-rq). *…	0	-1.31633
Schematics Service API	123	I'd like to replace the resource query that generates my Schematics Action's dynamic inventory using the Schematics Service API. Can you help me do that effectively and efficiently?	Functionality: Example request to replace a resource query. Description: Use this API to update the resource query definition used to build the dynamic inventory for the Schematics Action. For more information, about resource query commands, refer to [ibmcloud schematics resource query update](https://cloud.ibm.com/docs/schematics?topic=schematics-schematics-cli-reference#schematics-update-rq). *…	0	-1.28569
Schematics Service API	123	I want to update a resource query definition for my Schematics Action using the Schematics Service API. Please guide me on how to use the replace\_resources\_query endpoint to modify the dynamic inventory query.	Functionality: Example request to replace a resource query. Description: Use this API to update the resource query definition used to build the dynamic inventory for the Schematics Action. For more information, about resource query commands, refer to [ibmcloud schematics resource query update](https://cloud.ibm.com/docs/schematics?topic=schematics-schematics-cli-reference#schematics-update-rq). *…	0	-1.26517
Schematics Service API	124	I'd like to obtain the current version details of the IBM Cloud Schematics API and its provider plugins using the Schematics Service API. Could you please guide me on how to do that?	Functionality: Get Schematics API information Description: Retrieve detailed information about the IBM Cloud Schematics API version and the version of the provider plug-ins that the API uses. Endpoint: get_schematics_version API: Schematics Service API	0	-1.49353
Schematics Service API	124	I'd like to know the detailed information about the current IBM Cloud Schematics API version and its provider plug-ins using the Schematics Service API. Could you please help me with that?	Functionality: Get Schematics API information Description: Retrieve detailed information about the IBM Cloud Schematics API version and the version of the provider plug-ins that the API uses. Endpoint: get_schematics_version API: Schematics Service API	0	-1.34925
Schematics Service API	124	I'd like to obtain the latest version information for the IBM Cloud Schematics API and its provider plug-ins using the Schematics Service API. Could you help me with that?	Functionality: Get Schematics API information Description: Retrieve detailed information about the IBM Cloud Schematics API version and the version of the provider plug-ins that the API uses. Endpoint: get_schematics_version API: Schematics Service API	0	-1.49144
Schematics Service API	124	I'm looking for a way to obtain detailed information about the version of the IBM Cloud Schematics API and its provider plug-ins. Could you help me accomplish this using the Schematics Service API?	Functionality: Get Schematics API information Description: Retrieve detailed information about the IBM Cloud Schematics API version and the version of the provider plug-ins that the API uses. Endpoint: get_schematics_version API: Schematics Service API	0	-1.23122
Schematics Service API	124	I want to obtain the specific version information for the IBM Cloud Schematics API and the provider plug-ins it utilizes. Could you please guide me on how to use the get\_schematics\_version endpoint from the Schematics Service API to achieve this?	Functionality: Get Schematics API information Description: Retrieve detailed information about the IBM Cloud Schematics API version and the version of the provider plug-ins that the API uses. Endpoint: get_schematics_version API: Schematics Service API	0	-1.30578
Schematics Service API	125	I want to delete a specific blueprint instance using the Schematics Service API. This process involves first destroying all associated cloud resources and then deleting the blueprint configuration from IBM Cloud Schematics. Please help me utilize the delete_blueprint endpoint to achieve this.	Functionality: Example request to delete the Blueprint instance. Description: Deleting a blueprint environment is a two stage process that first destroys all the associated cloud resources and second deletes the blueprint configuration in IBM Cloud Schematics. </br> </br>For more information about destroy blueprint and delete blueprint, see [destroying blueprint environment](https://cloud.ibm.com…	0	-0.713917
Schematics Service API	125	I'd like to delete a specific blueprint instance, including all associated cloud resources and the blueprint configuration, using the Schematics Service API. Please guide me on how to do this with the 'delete\_blueprint' endpoint.	Functionality: Example request to delete the Blueprint instance. Description: Deleting a blueprint environment is a two stage process that first destroys all the associated cloud resources and second deletes the blueprint configuration in IBM Cloud Schematics. </br> </br>For more information about destroy blueprint and delete blueprint, see [destroying blueprint environment](https://cloud.ibm.com…	0	-0.785967
Schematics Service API	125	I want to delete a specific blueprint instance using the Schematics Service API. This process involves destroying all associated cloud resources followed by deleting the blueprint configuration in IBM Cloud. Please help me execute this two-stage deletion with the delete_blueprint endpoint.	Functionality: Example request to delete the Blueprint instance. Description: Deleting a blueprint environment is a two stage process that first destroys all the associated cloud resources and second deletes the blueprint configuration in IBM Cloud Schematics. </br> </br>For more information about destroy blueprint and delete blueprint, see [destroying blueprint environment](https://cloud.ibm.com…	0	-0.729037
Schematics Service API	125	I want to delete a blueprint instance and all associated cloud resources using the Schematics Service API. Please guide me on how to use the delete\_blueprint endpoint for this purpose.	Functionality: Example request to delete the Blueprint instance. Description: Deleting a blueprint environment is a two stage process that first destroys all the associated cloud resources and second deletes the blueprint configuration in IBM Cloud Schematics. </br> </br>For more information about destroy blueprint and delete blueprint, see [destroying blueprint environment](https://cloud.ibm.com…	0	-0.813341
Schematics Service API	125	I'd like to delete a specific blueprint instance using the Schematics Service API. This process involves destroying all associated resources and then deleting the blueprint configuration from IBM Cloud Schematics. Please assist me with utilizing thedelete\_blueprint endpoint.	Functionality: Example request to delete the Blueprint instance. Description: Deleting a blueprint environment is a two stage process that first destroys all the associated cloud resources and second deletes the blueprint configuration in IBM Cloud Schematics. </br> </br>For more information about destroy blueprint and delete blueprint, see [destroying blueprint environment](https://cloud.ibm.com…	0	-0.723683
Schematics Service API	126	I want to display the contents of the `README.md` file from the Terraform template that my Schematics Workspace is using. Can you guide me on how to achieve this using the get\_workspace\_readme endpoint from the Schematics Service API?	Functionality: Show workspace template readme Description: Retrieve the `README.md` file of the Terraform of IBM Cloud catalog template that your workspace points to. Endpoint: get_workspace_readme API: Schematics Service API	0	-2.26288
Schematics Service API	126	I want to display the contents of the `README.md` file for the Terraform template associated with my IBM Cloud Schematics workshop, please guide me on how to use the Schematics Service API for this task.	Functionality: Show workspace template readme Description: Retrieve the `README.md` file of the Terraform of IBM Cloud catalog template that your workspace points to. Endpoint: get_workspace_readme API: Schematics Service API	0	-2.34069
Schematics Service API	126	I'm looking to retrieve the README.md file for the Terraform template associated with my workspace using the Schematics Service API. Could you help me with that using the get_workspace_readme endpoint?	Functionality: Show workspace template readme Description: Retrieve the `README.md` file of the Terraform of IBM Cloud catalog template that your workspace points to. Endpoint: get_workspace_readme API: Schematics Service API	0	-2.26015
Schematics Service API	126	I'd like to get the contents of the `README.md` file for the Terraform template associated with my Schematics workspace. Can you please provide guidance on how to use the `get_workspace_readme` endpoint from the Schematics Service API for this task?	Functionality: Show workspace template readme Description: Retrieve the `README.md` file of the Terraform of IBM Cloud catalog template that your workspace points to. Endpoint: get_workspace_readme API: Schematics Service API	0	-2.36092
Schematics Service API	126	I'd like to view the contents of the `README.md` file for the Terraform template associated with my current Schematics workspace using the Schematics Service API. Can you help me with that?	Functionality: Show workspace template readme Description: Retrieve the `README.md` file of the Terraform of IBM Cloud catalog template that your workspace points to. Endpoint: get_workspace_readme API: Schematics Service API	0	-2.22718
Schematics Service API	127	I want to update the KMS settings for a specific location using the Schematics Service API. Please guide me through the process with the update\_kms\_settings endpoint.	Functionality: Example to update the kms settings. Description: Replace or Update kms settings for a given location can be updated. **Note** you can update the kms settings only once. For example, if you use an API endpoint for a geography, such as North America, only kms settings for that region can be retrieved. <h3>Authorization</h3> Schematics support generic authorization for its resources. …	0	-1.63178
Schematics Service API	127	I'd like to update the KMS settings for a specific location using the Schematics Service API. Since I can only set the KMS settings for a region once, please guide me on how to use the update\_kms\_settings endpoint effectively to accomplish this task.	Functionality: Example to update the kms settings. Description: Replace or Update kms settings for a given location can be updated. **Note** you can update the kms settings only once. For example, if you use an API endpoint for a geography, such as North America, only kms settings for that region can be retrieved. <h3>Authorization</h3> Schematics support generic authorization for its resources. …	0	-1.61297
Schematics Service API	127	I'd like to learn how to update the KMS settings for a specific location using the Schematics Service API's update\_kms\_settings endpoint. Could you please guide me through this process?	Functionality: Example to update the kms settings. Description: Replace or Update kms settings for a given location can be updated. **Note** you can update the kms settings only once. For example, if you use an API endpoint for a geography, such as North America, only kms settings for that region can be retrieved. <h3>Authorization</h3> Schematics support generic authorization for its resources. …	0	-1.65575
Schematics Service API	127	I want to update the KMS settings for a specific location using the Schematics Service API. Can you please guide me on how to use the update_kms_settings endpoint for this purpose?	Functionality: Example to update the kms settings. Description: Replace or Update kms settings for a given location can be updated. **Note** you can update the kms settings only once. For example, if you use an API endpoint for a geography, such as North America, only kms settings for that region can be retrieved. <h3>Authorization</h3> Schematics support generic authorization for its resources. …	0	-1.64693
Schematics Service API	127	I'd like to update the KMS settings for a specific location using the Schematics Service API's update\_kms\_settings endpoint. Since I can only set these settings once for a given region, please help me ensure I get it right.	Functionality: Example to update the kms settings. Description: Replace or Update kms settings for a given location can be updated. **Note** you can update the kms settings only once. For example, if you use an API endpoint for a geography, such as North America, only kms settings for that region can be retrieved. <h3>Authorization</h3> Schematics support generic authorization for its resources. …	0	-1.57463
Schematics Service API	128	I'd like to use the Schematics Service API to apply the changes described in my Terraform template to my workspace. When can I initiate this process, please? The apply job updates or creates resources based on my Terraform configuration. I need to ensure that my workspace is in an Inactive, Active, Failed, or Stopped state beforehand. After the apply job is complete, the state of the files will b…	Functionality: Example request to perform a Schematics apply action Description: Run a Schematics `apply` job against your workspace. An `apply` job provisions, modifies, or removes the IBM Cloud resources that you described in the Terraform template that your workspace points to. Depending on the type and number of resources that you want to provision or modify, this process might take a few min…	0	-1.35639
Schematics Service API	128	I want to apply a Terraform template and make changes to my IBM Cloud resources using the Schematics Service API. Please help me initiate an apply job with the apply\_workspace\_command API. Ensure my workspace is in an Inactive, Active, Failed, or Stopped state before performing this action. After the updates are applied, the state of the files will be persisted to determine the new resources in…	Functionality: Example request to perform a Schematics apply action Description: Run a Schematics `apply` job against your workspace. An `apply` job provisions, modifies, or removes the IBM Cloud resources that you described in the Terraform template that your workspace points to. Depending on the type and number of resources that you want to provision or modify, this process might take a few min…	0	-1.32165
Schematics Service API	128	I want to perform a Schematics "apply" job using the Terraform template in my workspace with the Schematics Service API. Please help me craft a query to initiate the job and get the job ID. My workspace must be in an "Inactive", "Active", "Failed", or "Stopped" state before applying. After the application is complete, the state of the files will be persisted to determine the resources in my IBM C…	Functionality: Example request to perform a Schematics apply action Description: Run a Schematics `apply` job against your workspace. An `apply` job provisions, modifies, or removes the IBM Cloud resources that you described in the Terraform template that your workspace points to. Depending on the type and number of resources that you want to provision or modify, this process might take a few min…	0	-1.13975
Schematics Service API	128	I'd like to perform an apply job in my Schematics workspace using the Schematics Service API. Once executed, the job will provision, modify, or remove IBM Cloud resources based on the Terraform template associated with the workspace. Before proceeding, please make sure my workspace is in an 'Inactive', 'Active', 'Failed', or 'Stopped' state. After completion, the state of the files will be persis…	Functionality: Example request to perform a Schematics apply action Description: Run a Schematics `apply` job against your workspace. An `apply` job provisions, modifies, or removes the IBM Cloud resources that you described in the Terraform template that your workspace points to. Depending on the type and number of resources that you want to provision or modify, this process might take a few min…	0	-1.26762
Schematics Service API	128	I want to apply the changes described in my Terraform template to my IBM Cloud account using the Schematics Service API. Please help me trigger an apply job with the correct state for my workspace.	Functionality: Example request to perform a Schematics apply action Description: Run a Schematics `apply` job against your workspace. An `apply` job provisions, modifies, or removes the IBM Cloud resources that you described in the Terraform template that your workspace points to. Depending on the type and number of resources that you want to provision or modify, this process might take a few min…	0	-1.48533
Power Cloud API	129	Please guide me on how to retrieve the details of a volumes-clone request using the Power Cloud API.	Functionality: Get the details for a volumes-clone request Description: Endpoint: pcloud.v2.volumesclone.get API: Power Cloud API	0	-2.15642
Power Cloud API	129	To view the details of a volumes-clone request I've initiated, how can I use the Power Cloud API?	Functionality: Get the details for a volumes-clone request Description: Endpoint: pcloud.v2.volumesclone.get API: Power Cloud API	0	-2.12981
Power Cloud API	129	"Show me how to retrieve the details of a volumes-clone request using the Power Cloud API."	Functionality: Get the details for a volumes-clone request Description: Endpoint: pcloud.v2.volumesclone.get API: Power Cloud API	0	-2.18953
Power Cloud API	129	Could you please guide me on how to retrieve the details of a volumes-clone request using the Power Cloud API?	Functionality: Get the details for a volumes-clone request Description: Endpoint: pcloud.v2.volumesclone.get API: Power Cloud API	0	-2.12318
Power Cloud API	129	Please provide me with the unique identifier of the volumes-clone request, and I'll show you how to retrieve its details using the Power Cloud API.	Functionality: Get the details for a volumes-clone request Description: Endpoint: pcloud.v2.volumesclone.get API: Power Cloud API	0	-2.00448
Power Cloud API	130	Please provide me with instructions on how to retrieve a list of all networks in my cloud instance using the Power Cloud API.	Functionality: Get all networks in this cloud instance Description: Endpoint: pcloud.networks.getall API: Power Cloud API	0	-2.2656
Power Cloud API	130	Please show me how to retrieve a list of all networks in my current cloud instance using the Power Cloud API.	Functionality: Get all networks in this cloud instance Description: Endpoint: pcloud.networks.getall API: Power Cloud API	0	-2.21372
Power Cloud API	130	How do I retrieve a list of all networks in my current cloud instance using the Power Cloud API?	Functionality: Get all networks in this cloud instance Description: Endpoint: pcloud.networks.getall API: Power Cloud API	0	-2.17438
Power Cloud API	130	Please help me retrieve a list of all networks present in my cloud instance using the Power Cloud API.	Functionality: Get all networks in this cloud instance Description: Endpoint: pcloud.networks.getall API: Power Cloud API	0	-2.21916
Power Cloud API	130	Please show me how to retrieve a list of all networks in my specific cloud instance using the Power Cloud API.	Functionality: Get all networks in this cloud instance Description: Endpoint: pcloud.networks.getall API: Power Cloud API	0	-2.22389
Power Cloud API	131	Please demonstrate how to retrieve details about a specific VPN connection using the Power Cloud API.	Functionality: Get VPN Connection Description: Get a VPN Connection Endpoint: pcloud.vpnconnections.get API: Power Cloud API	0	-2.25191
Power Cloud API	131	"Show me how to retrieve the details of a specific VPN connection using the Power Cloud API."	Functionality: Get VPN Connection Description: Get a VPN Connection Endpoint: pcloud.vpnconnections.get API: Power Cloud API	0	-2.29375
Power Cloud API	131	Please help me retrieve the details of a specific VPN connection using the Power Cloud API.	Functionality: Get VPN Connection Description: Get a VPN Connection Endpoint: pcloud.vpnconnections.get API: Power Cloud API	0	-2.17571
Power Cloud API	131	Please instruct me on how to retrieve details of a specific VPN connection using the Power Cloud API.	Functionality: Get VPN Connection Description: Get a VPN Connection Endpoint: pcloud.vpnconnections.get API: Power Cloud API	0	-2.24144
Power Cloud API	131	Please instruct me on how to retrieve details about an existing VPN connection using the Power Cloud API.	Functionality: Get VPN Connection Description: Get a VPN Connection Endpoint: pcloud.vpnconnections.get API: Power Cloud API	0	-2.28547
Power Cloud API	132	"Show me how to retrieve detailed information about a specific port using the Power Cloud API."	Functionality: Get a port's information Description: Endpoint: pcloud.networks.ports.get API: Power Cloud API	0	-1.94054
Power Cloud API	132	How do I retrieve the details of a specific port using the Power Cloud API?	Functionality: Get a port's information Description: Endpoint: pcloud.networks.ports.get API: Power Cloud API	0	-1.81241
Power Cloud API	132	How do I retrieve the details of a specific port using the Power Cloud API?	Functionality: Get a port's information Description: Endpoint: pcloud.networks.ports.get API: Power Cloud API	0	-1.81241
Power Cloud API	132	Please teach me how to retrieve detailed information about a specific port using the Power Cloud API.	Functionality: Get a port's information Description: Endpoint: pcloud.networks.ports.get API: Power Cloud API	0	-1.89532
Power Cloud API	132	"Show me how to retrieve detailed information about a specific port using the Power Cloud API."	Functionality: Get a port's information Description: Endpoint: pcloud.networks.ports.get API: Power Cloud API	0	-1.94054
Power Cloud API	133	Please teach me how to initiate the start action for a volumes-clone request and begin the consistency group process with the Power Cloud API.	Functionality: Initiate the Start action for a volumes-clone request Description: Start action starts the consistency group to initiate the flash copy. Endpoint: pcloud.v2.volumesclone.start.post API: Power Cloud API	0	-3.06099
Power Cloud API	133	Please show me how to initiate the start action for a volumes-clone request in Power Cloud API.	Functionality: Initiate the Start action for a volumes-clone request Description: Start action starts the consistency group to initiate the flash copy. Endpoint: pcloud.v2.volumesclone.start.post API: Power Cloud API	0	-2.97697
Power Cloud API	133	Please help me initiate the Start action for a volumes cloning process using the Power Cloud API. This action will begin the consistency group to initiate the flash copy.	Functionality: Initiate the Start action for a volumes-clone request Description: Start action starts the consistency group to initiate the flash copy. Endpoint: pcloud.v2.volumesclone.start.post API: Power Cloud API	0	-2.52603
Power Cloud API	133	Please guide me on initiating a start action for a volumes-clone request in Power Cloud API.	Functionality: Initiate the Start action for a volumes-clone request Description: Start action starts the consistency group to initiate the flash copy. Endpoint: pcloud.v2.volumesclone.start.post API: Power Cloud API	0	-2.98493
Power Cloud API	133	Please help me initiate the start action for a volumes-clone request using the Power Cloud API.	Functionality: Initiate the Start action for a volumes-clone request Description: Start action starts the consistency group to initiate the flash copy. Endpoint: pcloud.v2.volumesclone.start.post API: Power Cloud API	0	-3.01237
Power Cloud API	134	Please provide me with the current location details, including the specific data center name, and retrieve the corresponding disaster recovery site information using the Power Cloud API.	Functionality: Get the disaster recovery site details for the current location Description: Endpoint: pcloud.locations.disasterrecovery.get API: Power Cloud API	0	-1.76908
Power Cloud API	134	Please guide me on how to retrieve the details of the disaster recovery site for my current location using the Power Cloud API.	Functionality: Get the disaster recovery site details for the current location Description: Endpoint: pcloud.locations.disasterrecovery.get API: Power Cloud API	0	-1.64638
Power Cloud API	134	Please provide me with the current location details, including the specific data center name or ID, so I can retrieve the disaster recovery site information associated with it using the Power Cloud API.	Functionality: Get the disaster recovery site details for the current location Description: Endpoint: pcloud.locations.disasterrecovery.get API: Power Cloud API	0	-1.77787
Power Cloud API	134	How do I obtain the details of the disaster recovery site associated with my current location using the Power Cloud API?	Functionality: Get the disaster recovery site details for the current location Description: Endpoint: pcloud.locations.disasterrecovery.get API: Power Cloud API	0	-1.65927
Power Cloud API	134	Please provide me with the current location details and retrieve the corresponding disaster recovery site information using the Power Cloud API.	Functionality: Get the disaster recovery site details for the current location Description: Endpoint: pcloud.locations.disasterrecovery.get API: Power Cloud API	0	-1.62101
Power Cloud API	135	Please show me how to retrieve detailed information about a specific image in the Power Cloud API image catalog before its deprecation on March 31, 2023.	Functionality: Detailed info of an image in the image-catalog Description: This API is deprecated for /pcloud/v1/cloud-instances/{cloud_instance_id}/stock-images/{image_id}. >*Note*: Support for this API will be available till 31st March 2023. Endpoint: pcloud.images.get API: Power Cloud API	0	-2.70059
Power Cloud API	135	Please provide me with the steps to retrieve detailed information about a specific image in the image catalog using the Power Cloud API before its deprecation on March 31, 2023.	Functionality: Detailed info of an image in the image-catalog Description: This API is deprecated for /pcloud/v1/cloud-instances/{cloud_instance_id}/stock-images/{image_id}. >*Note*: Support for this API will be available till 31st March 2023. Endpoint: pcloud.images.get API: Power Cloud API	0	-2.70716
Power Cloud API	135	Please provide me with the steps to retrieve detailed information about a specific image in the Power Cloud API's image catalog before its deprecation on March 31, 2023.	Functionality: Detailed info of an image in the image-catalog Description: This API is deprecated for /pcloud/v1/cloud-instances/{cloud_instance_id}/stock-images/{image_id}. >*Note*: Support for this API will be available till 31st March 2023. Endpoint: pcloud.images.get API: Power Cloud API	0	-2.72955
Power Cloud API	135	"Show me how to retrieve detailed information about a specific image in the Power Cloud API image catalog before its deprecation on March 31, 2023."	Functionality: Detailed info of an image in the image-catalog Description: This API is deprecated for /pcloud/v1/cloud-instances/{cloud_instance_id}/stock-images/{image_id}. >*Note*: Support for this API will be available till 31st March 2023. Endpoint: pcloud.images.get API: Power Cloud API	0	-2.73201
Power Cloud API	135	Please show me how to retrieve detailed information about a specific image in the image catalog using the Power Cloud API before its deprecation on March 31, 2023.	Functionality: Detailed info of an image in the image-catalog Description: This API is deprecated for /pcloud/v1/cloud-instances/{cloud_instance_id}/stock-images/{image_id}. >*Note*: Support for this API will be available till 31st March 2023. Endpoint: pcloud.images.get API: Power Cloud API	0	-2.6963
Power Cloud API	136	"How do I update the configuration of an existing network using the Power Cloud API?"	Functionality: Update a Network Description: Endpoint: pcloud.networks.put API: Power Cloud API	0	-1.98741
Power Cloud API	136	Please guide me on how to modify the settings of an existing network using the Power Cloud API.	Functionality: Update a Network Description: Endpoint: pcloud.networks.put API: Power Cloud API	0	-1.99925
Power Cloud API	136	"Show me how to modify the settings of an existing network using the Power Cloud API."	Functionality: Update a Network Description: Endpoint: pcloud.networks.put API: Power Cloud API	0	-1.99147
Power Cloud API	136	Please explain how I can modify the details of an existing network using the Power Cloud API.	Functionality: Update a Network Description: Endpoint: pcloud.networks.put API: Power Cloud API	0	-1.9275
Power Cloud API	136	Please help me update the configuration of an existing network using the Power Cloud API.	Functionality: Update a Network Description: Endpoint: pcloud.networks.put API: Power Cloud API	0	-2.0096
Power Cloud API	137	Please guide me on how to remove a specific snapshot of my cloud instance using the Power Cloud API.	Functionality: Delete a PVM instance snapshot of a cloud instance Description: Endpoint: pcloud.cloudinstances.snapshots.delete API: Power Cloud API	0	-2.51446
Power Cloud API	137	Please guide me on how to delete a specific snapshot of a cloud instance using the Power Cloud API.	Functionality: Delete a PVM instance snapshot of a cloud instance Description: Endpoint: pcloud.cloudinstances.snapshots.delete API: Power Cloud API	0	-2.47319
Power Cloud API	137	Please guide me on how to delete a specific snapshot of my cloud instance using the Power Cloud API.	Functionality: Delete a PVM instance snapshot of a cloud instance Description: Endpoint: pcloud.cloudinstances.snapshots.delete API: Power Cloud API	0	-2.4951
Power Cloud API	137	Please guide me on how to delete a specific snapshot of a cloud instance using the Power Cloud API.	Functionality: Delete a PVM instance snapshot of a cloud instance Description: Endpoint: pcloud.cloudinstances.snapshots.delete API: Power Cloud API	0	-2.47319
Power Cloud API	137	Please teach me how to remove a specific snapshot of a cloud instance using the Power Cloud API.	Functionality: Delete a PVM instance snapshot of a cloud instance Description: Endpoint: pcloud.cloudinstances.snapshots.delete API: Power Cloud API	0	-2.52119
Power Cloud API	138	"How do I create a new volume group using the Power Cloud API?"	Functionality: Create a new volume group Description: Endpoint: pcloud.volumegroups.post API: Power Cloud API	0	-1.78447
Power Cloud API	138	Please instruct me on how to create a new volume group using the Power Cloud API.	Functionality: Create a new volume group Description: Endpoint: pcloud.volumegroups.post API: Power Cloud API	0	-1.80147
Power Cloud API	138	"I'd like to create a new volume group using the Power Cloud API. Could you please guide me through the process?"	Functionality: Create a new volume group Description: Endpoint: pcloud.volumegroups.post API: Power Cloud API	0	-1.84279
Power Cloud API	138	Please instruct me on how to create a new volume group using the Power Cloud API.	Functionality: Create a new volume group Description: Endpoint: pcloud.volumegroups.post API: Power Cloud API	0	-1.80147
Power Cloud API	138	"I'd like to create a new volume group using the Power Cloud API. Could you please provide me with the necessary steps and format for the request?"	Functionality: Create a new volume group Description: Endpoint: pcloud.volumegroups.post API: Power Cloud API	0	-1.84647
Power Cloud API	139	Please teach me how to add a new image export job to the queue using the Power Cloud API.	Functionality: Add image export job to the jobs queue Description: Endpoint: pcloud.v2.images.export.post API: Power Cloud API	0	-2.35558
Power Cloud API	139	Please show me how to create a new image export job in the jobs queue with the Power Cloud API.	Functionality: Add image export job to the jobs queue Description: Endpoint: pcloud.v2.images.export.post API: Power Cloud API	0	-2.2249
Power Cloud API	139	Please show me how to create a new image export job in the queue using the Power Cloud API.	Functionality: Add image export job to the jobs queue Description: Endpoint: pcloud.v2.images.export.post API: Power Cloud API	0	-2.48681
Power Cloud API	139	Please instruct me on how to initiate an image export job using the Power Cloud API.	Functionality: Add image export job to the jobs queue Description: Endpoint: pcloud.v2.images.export.post API: Power Cloud API	0	-2.51289
Power Cloud API	139	Please guide me on how to initiate an image export job using the Power Cloud API.	Functionality: Add image export job to the jobs queue Description: Endpoint: pcloud.v2.images.export.post API: Power Cloud API	0	-2.51942
Power Cloud API	140	"How can I check the current storage capacity for a specific storage type in a particular region using the Power Cloud API?"	Functionality: Storage capacity for a storage type in a region Description: Endpoint: pcloud.storagecapacity.types.get API: Power Cloud API	0	-2.68783
Power Cloud API	140	"How can I find the available storage capacity for a specific storage type in a certain region using the Power Cloud API?"	Functionality: Storage capacity for a storage type in a region Description: Endpoint: pcloud.storagecapacity.types.get API: Power Cloud API	0	-2.60985
Power Cloud API	140	Please instruct me on how to obtain the storage capacity information for a specific storage type in a chosen region using the Power Cloud API.	Functionality: Storage capacity for a storage type in a region Description: Endpoint: pcloud.storagecapacity.types.get API: Power Cloud API	0	-2.56594
Power Cloud API	140	Please provide me with the region name and the specific storage type to retrieve the current storage capacity using the Power Cloud API.	Functionality: Storage capacity for a storage type in a region Description: Endpoint: pcloud.storagecapacity.types.get API: Power Cloud API	0	-2.63722
Power Cloud API	140	Please help me find out the available storage capacity for a specific storage type in a particular region using the Power Cloud API.	Functionality: Storage capacity for a storage type in a region Description: Endpoint: pcloud.storagecapacity.types.get API: Power Cloud API	0	-2.44077
Power Cloud API	141	Please guide me on deleting a specific server placement group using the Power Cloud API.	Functionality: Delete Server Placement Group Description: Endpoint: pcloud.placementgroups.delete API: Power Cloud API	0	-1.7692
Power Cloud API	141	Please guide me on how to delete a server placement group using the Power Cloud API.	Functionality: Delete Server Placement Group Description: Endpoint: pcloud.placementgroups.delete API: Power Cloud API	0	-1.79841
Power Cloud API	141	Please help me delete a specific server placement group using the Power Cloud API.	Functionality: Delete Server Placement Group Description: Endpoint: pcloud.placementgroups.delete API: Power Cloud API	0	-1.75354
Power Cloud API	141	Please instruct me on how to delete a specific Server Placement Group using the Power Cloud API.	Functionality: Delete Server Placement Group Description: Endpoint: pcloud.placementgroups.delete API: Power Cloud API	0	-1.76643
Power Cloud API	141	Please guide me on how to remove a specific Server Placement Group using the Power Cloud API.	Functionality: Delete Server Placement Group Description: Endpoint: pcloud.placementgroups.delete API: Power Cloud API	0	-1.77689
Power Cloud API	142	Please guide me on how to retrieve a list of all volume groups using the Power Cloud API.	Functionality: Get all volume groups Description: Endpoint: pcloud.volumegroups.getall API: Power Cloud API	0	-2.21572
Power Cloud API	142	Please show me how to retrieve a list of all volume groups using the Power Cloud API.	Functionality: Get all volume groups Description: Endpoint: pcloud.volumegroups.getall API: Power Cloud API	0	-2.20648
Power Cloud API	142	How do I retrieve a list of all volume groups using the Power Cloud API?	Functionality: Get all volume groups Description: Endpoint: pcloud.volumegroups.getall API: Power Cloud API	0	-2.2147
Power Cloud API	142	Please show me how to retrieve a list of all volume groups using the Power Cloud API.	Functionality: Get all volume groups Description: Endpoint: pcloud.volumegroups.getall API: Power Cloud API	0	-2.20648
Power Cloud API	142	Please instruct me on how to retrieve a list of all volume groups using the Power Cloud API.	Functionality: Get all volume groups Description: Endpoint: pcloud.volumegroups.getall API: Power Cloud API	0	-2.21789
Watson OpenScale v2 API	143	How can I use the Watson OpenScale v2 API to compute bias mitigation for a specified model and apply the necessary fairness monitoring debias request payload?	Functionality: Computes the bias mitigation/remediation for the specified model Description: Computes the bias mitigation/remediation for the specified model. The fairness monitoring debias request payload details must be valid. Endpoint: subscriptions_score API: Watson OpenScale v2 API	0	-1.03661
Watson OpenScale v2 API	143	How do I compute bias mitigation for a specific model using the Watson OpenScale v2 API?	Functionality: Computes the bias mitigation/remediation for the specified model Description: Computes the bias mitigation/remediation for the specified model. The fairness monitoring debias request payload details must be valid. Endpoint: subscriptions_score API: Watson OpenScale v2 API	0	-0.925484
Watson OpenScale v2 API	143	How can I request and apply bias mitigation/remediation to a specific model using the Watson OpenScale v2 API?	Functionality: Computes the bias mitigation/remediation for the specified model Description: Computes the bias mitigation/remediation for the specified model. The fairness monitoring debias request payload details must be valid. Endpoint: subscriptions_score API: Watson OpenScale v2 API	0	-1.09511
Watson OpenScale v2 API	143	How do I compute bias mitigation/remediation for my specified model using the Watson OpenScale v2 API?	Functionality: Computes the bias mitigation/remediation for the specified model Description: Computes the bias mitigation/remediation for the specified model. The fairness monitoring debias request payload details must be valid. Endpoint: subscriptions_score API: Watson OpenScale v2 API	0	-0.850792
Watson OpenScale v2 API	143	How can I compute the bias mitigation for a specific model using the capabilities of the Watson OpenScale v2 API?	Functionality: Computes the bias mitigation/remediation for the specified model Description: Computes the bias mitigation/remediation for the specified model. The fairness monitoring debias request payload details must be valid. Endpoint: subscriptions_score API: Watson OpenScale v2 API	0	-0.954308
IBM Event Streams Admin REST API	144	How can I delete a specific consumer group using the IBM Event Streams Admin REST API with a Curl command?	Functionality: Example delete consumer group using Curl. Description: Delete a consumer group. Endpoint: DeleteConsumerGroup API: IBM Event Streams Admin REST API	0	-1.3614
IBM Event Streams Admin REST API	144	How do I delete a specific consumer group using the IBM Event Streams Admin REST API with Curl?	Functionality: Example delete consumer group using Curl. Description: Delete a consumer group. Endpoint: DeleteConsumerGroup API: IBM Event Streams Admin REST API	0	-1.32515
IBM Event Streams Admin REST API	144	How do I delete a specific consumer group using the IBM Event Streams Admin REST API with Curl?	Functionality: Example delete consumer group using Curl. Description: Delete a consumer group. Endpoint: DeleteConsumerGroup API: IBM Event Streams Admin REST API	0	-1.32515
IBM Event Streams Admin REST API	144	How would I delete an existing consumer group using the IBM Event Streams Admin REST API with Curl?	Functionality: Example delete consumer group using Curl. Description: Delete a consumer group. Endpoint: DeleteConsumerGroup API: IBM Event Streams Admin REST API	0	-1.32697
Db2 Warehouse on Cloud v4	145	I want to view the current list of active connections in my Db2 Warehouse on Cloud v4 using the MonitorConnectionDeltaGet API. Could you please provide an example of how to retrieve this information in a clear and concise manner?	Functionality: Returns a list of connections Description: Returns a list of connections. Each connection represents a row. If there are multiple collections. They'll been aggregated averagely. Endpoint: MonitorConnectionDeltaGet API: Db2 Warehouse on Cloud v4	0	-3.31036
Db2 Warehouse on Cloud v4	145	How do I retrieve a list of active connections, along with average statistics, using the Db2 Warehouse on Cloud v4 API?	Functionality: Returns a list of connections Description: Returns a list of connections. Each connection represents a row. If there are multiple collections. They'll been aggregated averagely. Endpoint: MonitorConnectionDeltaGet API: Db2 Warehouse on Cloud v4	0	-4.04391
Db2 Warehouse on Cloud v4	145	I'd like to see a list of current database connections using Db2 Warehouse on Cloud v4. Please help me understand how to use the API to get this information.	Functionality: Returns a list of connections Description: Returns a list of connections. Each connection represents a row. If there are multiple collections. They'll been aggregated averagely. Endpoint: MonitorConnectionDeltaGet API: Db2 Warehouse on Cloud v4	0	-3.78046
Db2 Warehouse on Cloud v4	145	How do I retrieve a list of active database connections, along with the average number of connections per collection, using the Db2 Warehouse on Cloud v4 API?	Functionality: Returns a list of connections Description: Returns a list of connections. Each connection represents a row. If there are multiple collections. They'll been aggregated averagely. Endpoint: MonitorConnectionDeltaGet API: Db2 Warehouse on Cloud v4	0	-3.7143
Db2 Warehouse on Cloud v4	145	How can I view a list of current connections using the Db2 Warehouse on Cloud v4 API?	Functionality: Returns a list of connections Description: Returns a list of connections. Each connection represents a row. If there are multiple collections. They'll been aggregated averagely. Endpoint: MonitorConnectionDeltaGet API: Db2 Warehouse on Cloud v4	0	-3.81792
Db2 Warehouse on Cloud v4	146	As an assistant I don't have the ability to directly interact with APIs or databases. However, I'd be happy to help you craft a user query related to unlocking user accounts using the Db2 Warehouse on Cloud v4 API. --- **I am an admin user and I need to unlock a user account in Db2 Warehouse on Cloud v4.** --- This user query is specific, precise, and concise while integrating the API name and it…	Functionality: Unlocks a user account **ADMIN ONLY** Description: Admin users can unlock users' accounts which have been locked out following repeated failed authentication attempts. Endpoint: UnlockUser API: Db2 Warehouse on Cloud v4	0	-2.21613
Db2 Warehouse on Cloud v4	146	I'm an admin user looking to unlock a user account that has been locked out on Db2 Warehouse on Cloud v4, how do I proceed?	Functionality: Unlocks a user account **ADMIN ONLY** Description: Admin users can unlock users' accounts which have been locked out following repeated failed authentication attempts. Endpoint: UnlockUser API: Db2 Warehouse on Cloud v4	0	-2.30529
Db2 Warehouse on Cloud v4	146	As an assistant I don't have the ability to directly interact with APIs or databases. However, I can help you craft a user query for the provided API. Here's an example: "How do I unlock a user account using Db2 Warehouse on Cloud v4? I am an admin user and need to regain access for a user who has had their account locked due to multiple failed authentication attempts."	Functionality: Unlocks a user account **ADMIN ONLY** Description: Admin users can unlock users' accounts which have been locked out following repeated failed authentication attempts. Endpoint: UnlockUser API: Db2 Warehouse on Cloud v4	0	-2.18062
Db2 Warehouse on Cloud v4	146	I am an administrator and I want to unlock a user account that has been locked out with Db2 Warehouse on Cloud v4. How can I use this API to accomplish this task?	Functionality: Unlocks a user account **ADMIN ONLY** Description: Admin users can unlock users' accounts which have been locked out following repeated failed authentication attempts. Endpoint: UnlockUser API: Db2 Warehouse on Cloud v4	0	-2.26886
Db2 Warehouse on Cloud v4	146	As an assistant I don't have the ability to directly interact with APIs or databases, but I can help you create a query for unlocking a user account using the Db2 Warehouse on Cloud v4 API. Query: I'm an admin user looking to unlock a user account in Db2 Warehouse on Cloud v4. How do I proceed with this task?	Functionality: Unlocks a user account **ADMIN ONLY** Description: Admin users can unlock users' accounts which have been locked out following repeated failed authentication attempts. Endpoint: UnlockUser API: Db2 Warehouse on Cloud v4	0	-2.29165
Db2 Warehouse on Cloud v4	147	I want to migrate an existing Key Protect key between different keys in Db2 Warehouse on Cloud v4. Can you guide me through the process using the API UpdateConfiguration?	Functionality: Example request Description: Migrate existing key, from local key to Key Proect key or from one Key Protect key to another Endpoint: UpdateConfigration API: Db2 Warehouse on Cloud v4	0	-2.95769
Db2 Warehouse on Cloud v4	147	I want to update my existing key in Db2 Warehouse on Cloud v4. Specifically, I'd like to migrate a local key to a Key Protect key or move a Key Protect key to another one. How do I make this request using the API's UpdateConfiguration functionality?	Functionality: Example request Description: Migrate existing key, from local key to Key Proect key or from one Key Protect key to another Endpoint: UpdateConfigration API: Db2 Warehouse on Cloud v4	0	-2.5514
Db2 Warehouse on Cloud v4	147	I want to migrate an existing encryption key from a local key to a Key Protect key, or vice versa, using Db2 Warehouse on Cloud v4. Can you help me construct a query for that?	Functionality: Example request Description: Migrate existing key, from local key to Key Proect key or from one Key Protect key to another Endpoint: UpdateConfigration API: Db2 Warehouse on Cloud v4	0	-2.91461
Db2 Warehouse on Cloud v4	147	How do I migrate an existing key, either from a local key to a Key Protect key or from one Key Protect key to another, using Db2 Warehouse on Cloud v4?	Functionality: Example request Description: Migrate existing key, from local key to Key Proect key or from one Key Protect key to another Endpoint: UpdateConfigration API: Db2 Warehouse on Cloud v4	0	-2.57878
Db2 Warehouse on Cloud v4	147	I want to update the Key Protect key for an existing encryption key using Db2 Warehouse on Cloud v4. Can you help me craft a query to accomplish this task?	Functionality: Example request Description: Migrate existing key, from local key to Key Proect key or from one Key Protect key to another Endpoint: UpdateConfigration API: Db2 Warehouse on Cloud v4	0	-3.36026
Db2 Warehouse on Cloud v4	148	I want to manage access to my Db2 Warehouse on Cloud v4 resources, please show me how to use the modifyPrivileges API to grant or revoke privileges. For example, how can I give a specific user read access to a particular schema?	Functionality: Grant or revoke privileges Description: Grant or revoke privileges Endpoint: modifyPrivileges API: Db2 Warehouse on Cloud v4	0	-1.41441
Db2 Warehouse on Cloud v4	148	How can I use the Db2 Warehouse on Cloud v4 API to revoke specific privileges for a user in my database?	Functionality: Grant or revoke privileges Description: Grant or revoke privileges Endpoint: modifyPrivileges API: Db2 Warehouse on Cloud v4	0	-1.49353
Db2 Warehouse on Cloud v4	148	How do I use the Db2 Warehouse on Cloud v4 API to revoke a specific user's read access to a database?	Functionality: Grant or revoke privileges Description: Grant or revoke privileges Endpoint: modifyPrivileges API: Db2 Warehouse on Cloud v4	0	-1.56136
Db2 Warehouse on Cloud v4	148	I'd like to manage the access permissions for my data in Db2 Warehouse on Cloud v4. Could you please show me an example of how to use the modifyPrivileges API to revoke privileges for a specific user?	Functionality: Grant or revoke privileges Description: Grant or revoke privileges Endpoint: modifyPrivileges API: Db2 Warehouse on Cloud v4	0	-1.41515
Db2 Warehouse on Cloud v4	148	How can I use Db2 Warehouse on Cloud v4 to revoke specific privileges for a user in my database?	Functionality: Grant or revoke privileges Description: Grant or revoke privileges Endpoint: modifyPrivileges API: Db2 Warehouse on Cloud v4	0	-1.42445
Db2 Warehouse on Cloud v4	149	I want to retrieve the keys associated with a specific Key Protect instance using Db2 Warehouse on Cloud v4. Can you please guide me on how to do it with the GetKPInstanceKeys API?	Functionality: Returns keys for given Key Protect instance Description: Returns keys for given Key Protect instance Endpoint: GetKPInstanceKeys API: Db2 Warehouse on Cloud v4	0	-1.91573
Db2 Warehouse on Cloud v4	149	I want to retrieve the keys associated with a specific Key Protect instance using Db2 Warehouse on Cloud v4. Can you provide an example of how to do this using the "GetKPInstanceKeys" API?	Functionality: Returns keys for given Key Protect instance Description: Returns keys for given Key Protect instance Endpoint: GetKPInstanceKeys API: Db2 Warehouse on Cloud v4	0	-1.90159
Db2 Warehouse on Cloud v4	149	How do I retrieve the keys for a specific Key Protect instance in Db2 Warehouse on Cloud v4?	Functionality: Returns keys for given Key Protect instance Description: Returns keys for given Key Protect instance Endpoint: GetKPInstanceKeys API: Db2 Warehouse on Cloud v4	0	-2.22747
Db2 Warehouse on Cloud v4	149	I'd like to retrieve the keys associated with a specific Key Protect instance using Db2 Warehouse on Cloud v4. Please guide me on how to use the API to accomplish this task.	Functionality: Returns keys for given Key Protect instance Description: Returns keys for given Key Protect instance Endpoint: GetKPInstanceKeys API: Db2 Warehouse on Cloud v4	0	-2.22981
Db2 Warehouse on Cloud v4	149	How can I retrieve the keys associated with a specific Key Protect instance using Db2 Warehouse on Cloud v4?	Functionality: Returns keys for given Key Protect instance Description: Returns keys for given Key Protect instance Endpoint: GetKPInstanceKeys API: Db2 Warehouse on Cloud v4	0	-2.26616
Db2 Warehouse on Cloud v4	150	As a DB administrator, I want to check the storage usage history for the past 30 days with Db2 Warehouse on Cloud v4, so how can I use the GetStorageUsageHistory API to retrieve this information?	Functionality: Returns storage usage history **DB ADMIN ONLY** Description: Returns a list of storage usage daily stats. Currenlty the history of the last seven days is returned. Endpoint: GetStorageUsageHistory API: Db2 Warehouse on Cloud v4	0	-2.86797
Db2 Warehouse on Cloud v4	150	As a DB admin, I want to access the storage usage history for the last 30 days using the Db2 Warehouse on Cloud v4 API. Can you help me construct a query to retrieve this data?	Functionality: Returns storage usage history **DB ADMIN ONLY** Description: Returns a list of storage usage daily stats. Currenlty the history of the last seven days is returned. Endpoint: GetStorageUsageHistory API: Db2 Warehouse on Cloud v4	0	-2.91268
Db2 Warehouse on Cloud v4	150	As a DB Admin, I want to retrieve the detailed storage usage history for the last 30 days using Db2 Warehouse on Cloud v4, not just the last seven days. How can I achieve this using the "GetStorageUsageHistory" API?	Functionality: Returns storage usage history **DB ADMIN ONLY** Description: Returns a list of storage usage daily stats. Currenlty the history of the last seven days is returned. Endpoint: GetStorageUsageHistory API: Db2 Warehouse on Cloud v4	0	-2.63615
Db2 Warehouse on Cloud v4	150	As a DB administrator, I want to retrieve the detailed storage usage history for the last 30 days using the Db2 Warehouse on Cloud v4 API. Could you please guide me on how to make an API call to GetStorageUsageHistory and obtain the desired result?	Functionality: Returns storage usage history **DB ADMIN ONLY** Description: Returns a list of storage usage daily stats. Currenlty the history of the last seven days is returned. Endpoint: GetStorageUsageHistory API: Db2 Warehouse on Cloud v4	0	-2.91059
Db2 Warehouse on Cloud v4	150	As a DB administrator, I'd like to know how to retrieve the last seven days' worth of daily storage usage statistics with Db2 Warehouse on Cloud v4.	Functionality: Returns storage usage history **DB ADMIN ONLY** Description: Returns a list of storage usage daily stats. Currenlty the history of the last seven days is returned. Endpoint: GetStorageUsageHistory API: Db2 Warehouse on Cloud v4	0	-2.91396
Db2 Warehouse on Cloud v4	151	I am a DB administrator and I need to terminate an active connection to our Db2 Warehouse on Cloud v4 instance. How do I effectively use the Db2 Warehouse on Cloud v4 API to accomplish this task?	Functionality: Terminates a database connection **DB ADMIN ONLY** Description: Terminates an active database connection. Endpoint: TerminateActiveConnection API: Db2 Warehouse on Cloud v4	0	-2.27012
Db2 Warehouse on Cloud v4	151	I'm a DB administrator and I need to terminate an active database connection in Db2 Warehouse on Cloud v4. How do I use this API to effectively end a specific connection?	Functionality: Terminates a database connection **DB ADMIN ONLY** Description: Terminates an active database connection. Endpoint: TerminateActiveConnection API: Db2 Warehouse on Cloud v4	0	-2.44003
Db2 Warehouse on Cloud v4	151	As the DB administrator, I want to know how to terminate an active database connection using Db2 Warehouse on Cloud v4.	Functionality: Terminates a database connection **DB ADMIN ONLY** Description: Terminates an active database connection. Endpoint: TerminateActiveConnection API: Db2 Warehouse on Cloud v4	0	-2.44866
Db2 Warehouse on Cloud v4	151	I am a DB administrator and I need to terminate an active database connection using Db2 Warehouse on Cloud v4. How do I effectively use this API to accomplish this task?	Functionality: Terminates a database connection **DB ADMIN ONLY** Description: Terminates an active database connection. Endpoint: TerminateActiveConnection API: Db2 Warehouse on Cloud v4	0	-2.32755
Db2 Warehouse on Cloud v4	151	As a helper, I understand that the user wants to terminate an active database connection using the Db2 Warehouse on Cloud v4 API. Here's a sample user query that meets the given requirements: "How do I terminate an active database connection using Db2 Warehouse on Cloud v4?"	Functionality: Terminates a database connection **DB ADMIN ONLY** Description: Terminates an active database connection. Endpoint: TerminateActiveConnection API: Db2 Warehouse on Cloud v4	0	-2.50976
Db2 Warehouse on Cloud v4	152	As a DB administrator, I want to retrieve the amount of time spent on each operation during a specific time frame using Db2 Warehouse on Cloud v4. How can I execute a query to obtain this information?	Functionality: Return the time spent in each operation for a specified time frame. **DB ADMIN ONLY** Description: Return the time spent in each operation for a specified time frame. Endpoint: GetTimespent API: Db2 Warehouse on Cloud v4	0	-2.34127
Db2 Warehouse on Cloud v4	152	As a DB admin, I want to know how to use the Db2 Warehouse on Cloud v4 API to retrieve the time spent in each operation during a specific time frame.	Functionality: Return the time spent in each operation for a specified time frame. **DB ADMIN ONLY** Description: Return the time spent in each operation for a specified time frame. Endpoint: GetTimespent API: Db2 Warehouse on Cloud v4	0	-2.06876
Db2 Warehouse on Cloud v4	152	As a DB admin, I want to know how long each operation took within a specific time frame using Db2 Warehouse on Cloud v4, could you please guide me on utilizing the GetTimespent API to retrieve this information?	Functionality: Return the time spent in each operation for a specified time frame. **DB ADMIN ONLY** Description: Return the time spent in each operation for a specified time frame. Endpoint: GetTimespent API: Db2 Warehouse on Cloud v4	0	-1.99681
Db2 Warehouse on Cloud v4	152	As a DB administrator, I want to know the time spent on each operation during a specific time frame using the Db2 Warehouse on Cloud v4 API. Could you help me craft a query to retrieve this information using the GetTimespent functionality?	Functionality: Return the time spent in each operation for a specified time frame. **DB ADMIN ONLY** Description: Return the time spent in each operation for a specified time frame. Endpoint: GetTimespent API: Db2 Warehouse on Cloud v4	0	-2.1075
Db2 Warehouse on Cloud v4	152	As a DB administrator, I would like to utilize the Db2 Warehouse on Cloud v4 API to obtain a detailed report of the time spent on each operation during a specified timeframe. Can you please guide me on how to use the GetTimespent API to achieve this?	Functionality: Return the time spent in each operation for a specified time frame. **DB ADMIN ONLY** Description: Return the time spent in each operation for a specified time frame. Endpoint: GetTimespent API: Db2 Warehouse on Cloud v4	0	-2.04436
Db2 Warehouse on Cloud v4	153	I'd like to know how to retrieve the backup settings, including the scheduled time and retention policy, for my Db2 Warehouse on Cloud v4 instance.	Functionality: Get backup setting Description: Get backup setting for scheduled time and retention policy Endpoint: getBackupSetting API: Db2 Warehouse on Cloud v4	0	-2.09829
Db2 Warehouse on Cloud v4	153	How do I retrieve the backup setting, including the scheduled time and retention policy, using Db2 Warehouse on Cloud v4?	Functionality: Get backup setting Description: Get backup setting for scheduled time and retention policy Endpoint: getBackupSetting API: Db2 Warehouse on Cloud v4	0	-1.96792
Db2 Warehouse on Cloud v4	153	How can I retrieve the backup setting with specific schedule time and retention policy using the Db2 Warehouse on Cloud v4 API?	Functionality: Get backup setting Description: Get backup setting for scheduled time and retention policy Endpoint: getBackupSetting API: Db2 Warehouse on Cloud v4	0	-1.94613
Db2 Warehouse on Cloud v4	153	I'd like to retrieve the backup settings, including the scheduled time and retention policy, for my Db2 Warehouse on Cloud v4 instance. Could you show me how to do that using the Db2 Warehouse on Cloud v4 API?	Functionality: Get backup setting Description: Get backup setting for scheduled time and retention policy Endpoint: getBackupSetting API: Db2 Warehouse on Cloud v4	0	-2.14132
Db2 Warehouse on Cloud v4	153	How do I retrieve the backup setting, including the scheduled time and retention policy, using Db2 Warehouse on Cloud v4?	Functionality: Get backup setting Description: Get backup setting for scheduled time and retention policy Endpoint: getBackupSetting API: Db2 Warehouse on Cloud v4	0	-1.96792
Db2 Warehouse on Cloud v4	154	I want to create a Message Queue Table (MQT) in Db2 Warehouse on Cloud v4. Can you please provide me with the correct SQL statement template using the getMQTDDL API?	Functionality: Get the SQL statement template for creating MQT table Description: Get the SQL statement template for creating MQT table. Endpoint: getMQTDDL API: Db2 Warehouse on Cloud v4	0	-1.62388
Db2 Warehouse on Cloud v4	154	I want to create a new MQT table in Db2 Warehouse on Cloud v4. Could you please provide me with the SQL statement template to do so using the getMQTDDL API?	Functionality: Get the SQL statement template for creating MQT table Description: Get the SQL statement template for creating MQT table. Endpoint: getMQTDDL API: Db2 Warehouse on Cloud v4	0	-1.58091
Db2 Warehouse on Cloud v4	154	I want to create a new MQT table in Db2 Warehouse on Cloud v4. Can you please provide me with the correct SQL statement template using the getMQTDDL API?	Functionality: Get the SQL statement template for creating MQT table Description: Get the SQL statement template for creating MQT table. Endpoint: getMQTDDL API: Db2 Warehouse on Cloud v4	0	-1.5987
Db2 Warehouse on Cloud v4	154	I want to create a Materialized Query Table (MQT) in Db2 Warehouse on Cloud v4, but I'm unsure of the exact SQL statement to use. Could you please provide the template SQL statement for creating an MQT table using the Db2 Warehouse on Cloud v4 API?	Functionality: Get the SQL statement template for creating MQT table Description: Get the SQL statement template for creating MQT table. Endpoint: getMQTDDL API: Db2 Warehouse on Cloud v4	0	-2.02215
Db2 Warehouse on Cloud v4	154	I'd like to create a MQT table using the Db2 Warehouse on Cloud v4, can you provide me with the SQL statement template for that using the getMQTDDL API?	Functionality: Get the SQL statement template for creating MQT table Description: Get the SQL statement template for creating MQT table. Endpoint: getMQTDDL API: Db2 Warehouse on Cloud v4	0	-1.5722
Db2 Warehouse on Cloud v4	155	As a system administrator, I want to update the contact information of a specific user in the Db2 Warehouse on Cloud v4. How do I proceed with this task, as the attribute 'iam' cannot be modified?	Functionality: Updates an existing user Description: Updates an existing user. Attribute 'iam' can not be updated. That means no conversion between IBMid users and normal users. System administrators may update user information for any user. Regular users may only update themselves. Endpoint: UpdateUser API: Db2 Warehouse on Cloud v4	0	-3.01259
Db2 Warehouse on Cloud v4	155	As a system administrator, I want to update specific information about an existing user in Db2 Warehouse on Cloud v4, excluding the attribute 'iam' since it cannot be changed. Please guide me through the process.	Functionality: Updates an existing user Description: Updates an existing user. Attribute 'iam' can not be updated. That means no conversion between IBMid users and normal users. System administrators may update user information for any user. Regular users may only update themselves. Endpoint: UpdateUser API: Db2 Warehouse on Cloud v4	0	-2.85401
Db2 Warehouse on Cloud v4	155	As a system administrator, I want to update certain details for an existing user in Db2 Warehouse on Cloud v4, such as email address or phone number, since I am unable to modify their IBMid. How can I make use of the UpdateUser API to accomplish this task?	Functionality: Updates an existing user Description: Updates an existing user. Attribute 'iam' can not be updated. That means no conversion between IBMid users and normal users. System administrators may update user information for any user. Regular users may only update themselves. Endpoint: UpdateUser API: Db2 Warehouse on Cloud v4	0	-3.27308
Db2 Warehouse on Cloud v4	155	I'd like to update my personal information in Db2 Warehouse on Cloud v4, such as my email address or phone number. How can I do that? If I'm a system administrator, how can I update another user's information?	Functionality: Updates an existing user Description: Updates an existing user. Attribute 'iam' can not be updated. That means no conversion between IBMid users and normal users. System administrators may update user information for any user. Regular users may only update themselves. Endpoint: UpdateUser API: Db2 Warehouse on Cloud v4	0	-3.10493
Db2 Warehouse on Cloud v4	155	As a system administrator, I want to update the email address of a specific user in Db2 Warehouse on Cloud v4, but I can't change their IBMid attribute. How do I update that user's email address using the UpdateUser API?	Functionality: Updates an existing user Description: Updates an existing user. Attribute 'iam' can not be updated. That means no conversion between IBMid users and normal users. System administrators may update user information for any user. Regular users may only update themselves. Endpoint: UpdateUser API: Db2 Warehouse on Cloud v4	0	-3.08857
Db2 Warehouse on Cloud v4	156	How do I check the current status of running tasks using Db2 Warehouse on Cloud v4 API?	Functionality: Get tasks status Description: Endpoint: getTasksStatus API: Db2 Warehouse on Cloud v4	0	-1.88872
Db2 Warehouse on Cloud v4	156	I want to check the current status of my running tasks in Db2 Warehouse on Cloud v4. Could you please guide me on how to use the 'getTasksStatus' API to accomplish this?	Functionality: Get tasks status Description: Endpoint: getTasksStatus API: Db2 Warehouse on Cloud v4	0	-1.84471
Db2 Warehouse on Cloud v4	156	How can I check the current status of ongoing tasks in Db2 Warehouse on Cloud v4?	Functionality: Get tasks status Description: Endpoint: getTasksStatus API: Db2 Warehouse on Cloud v4	0	-1.85094
Db2 Warehouse on Cloud v4	156	I want to check the current status of my running tasks using Db2 Warehouse on Cloud v4 API. Specifically, I'd like to use the `getTasksStatus` function to obtain this information. Could you please help me with the syntax and appropriate arguments for the query?	Functionality: Get tasks status Description: Endpoint: getTasksStatus API: Db2 Warehouse on Cloud v4	0	-1.71189
Db2 Warehouse on Cloud v4	156	How do I check the current status of running tasks with Db2 Warehouse on Cloud v4?	Functionality: Get tasks status Description: Endpoint: getTasksStatus API: Db2 Warehouse on Cloud v4	0	-1.85759
Db2 Warehouse on Cloud v4	157	How do I create a visual explain layout for my query results using Db2 Warehouse on Cloud v4?	Functionality: Generate visual explain layout Description: Generate visual explain laytout. Endpoint: GenerateVELayout API: Db2 Warehouse on Cloud v4	0	-3.03353
Db2 Warehouse on Cloud v4	157	I want to generate a clear and detailed visual explain layout for a query using Db2 Warehouse on Cloud v4 API. How can I achieve this?	Functionality: Generate visual explain layout Description: Generate visual explain laytout. Endpoint: GenerateVELayout API: Db2 Warehouse on Cloud v4	0	-3.08953
Db2 Warehouse on Cloud v4	157	How can I create a visual explain layout for my SQL query using Db2 Warehouse on Cloud v4?	Functionality: Generate visual explain layout Description: Generate visual explain laytout. Endpoint: GenerateVELayout API: Db2 Warehouse on Cloud v4	0	-3.14538
Db2 Warehouse on Cloud v4	157	I want to generate a clear and visual explanation of a query's execution plan using the Db2 Warehouse on Cloud v4. Can you show me how to use its GenerateVELayout API to create an instructive layout?	Functionality: Generate visual explain layout Description: Generate visual explain laytout. Endpoint: GenerateVELayout API: Db2 Warehouse on Cloud v4	0	-2.61071
Db2 Warehouse on Cloud v4	157	I want to create a visual explain layout for my SQL query results using the Db2 Warehouse on Cloud v4 API. How do I generate a visual explain layout?	Functionality: Generate visual explain layout Description: Generate visual explain laytout. Endpoint: GenerateVELayout API: Db2 Warehouse on Cloud v4	0	-2.95784
Db2 Warehouse on Cloud v4	158	I want to create a new table in Db2 Warehouse on Cloud v4, could you please help me generate the Table Definition Language (DDL) statement using the API?	Functionality: Generate table DDL Description: Generate table DDL. Endpoint: generateTableDDL API: Db2 Warehouse on Cloud v4	0	-2.31301
Db2 Warehouse on Cloud v4	158	I want to create a new table in my Db2 Warehouse on Cloud v4 database using the provided schema, and I need the SQL DDL statement to do so. Can you help me generate the table DDL using the Db2 Warehouse on Cloud v4 API?	Functionality: Generate table DDL Description: Generate table DDL. Endpoint: generateTableDDL API: Db2 Warehouse on Cloud v4	0	-2.29201
Db2 Warehouse on Cloud v4	158	I want to create a new table in my Db2 Warehouse on Cloud v4 schema, and I need help generating the table DDL statement using the provided API. How can I use the "generateTableDDL" functionality to accomplish this task?	Functionality: Generate table DDL Description: Generate table DDL. Endpoint: generateTableDDL API: Db2 Warehouse on Cloud v4	0	-1.94047
Db2 Warehouse on Cloud v4	158	I'd like to generate the Data Definition Language (DDL) for creating a new table using the Db2 Warehouse on Cloud v4 API. Could you please guide me through the process, including the required schema, column definitions, and data types?	Functionality: Generate table DDL Description: Generate table DDL. Endpoint: generateTableDDL API: Db2 Warehouse on Cloud v4	0	-2.32273
Db2 Warehouse on Cloud v4	158	I want to generate the Data Definition Language (DDL) for creating a new table using Db2 Warehouse on Cloud v4 API. Could you please help me construct the query for this task?	Functionality: Generate table DDL Description: Generate table DDL. Endpoint: generateTableDDL API: Db2 Warehouse on Cloud v4	0	-2.22226
Db2 Warehouse on Cloud v4	159	I'd like to retrieve the most recent table storage information for the Db2 Warehouse on Cloud v4. Can you explain how to use the API to get this data?	Functionality: Returns a table storage **DB ADMIN ONLY** Description: Returns a table storage. Only returns the last collected data between start and end. Endpoint: getTableStorage API: Db2 Warehouse on Cloud v4	0	-3.76
Db2 Warehouse on Cloud v4	159	I want to retrieve the most recent table storage data using Db2 Warehouse on Cloud v4. As a DB administrator, please help me craft a query to effectively utilize the getTableStorage API for this task.	Functionality: Returns a table storage **DB ADMIN ONLY** Description: Returns a table storage. Only returns the last collected data between start and end. Endpoint: getTableStorage API: Db2 Warehouse on Cloud v4	0	-3.52733
Db2 Warehouse on Cloud v4	159	I'd like to retrieve the most recent table storage information using Db2 Warehouse on Cloud v4. This operation should only be performed by a DB administrator. How can I effectively use the getTableStorage API to achieve this goal?	Functionality: Returns a table storage **DB ADMIN ONLY** Description: Returns a table storage. Only returns the last collected data between start and end. Endpoint: getTableStorage API: Db2 Warehouse on Cloud v4	0	-3.39893
Db2 Warehouse on Cloud v4	159	I'd like to retrieve the most recent table storage data using Db2 Warehouse on Cloud v4 as an admin. How can I do that with the getTableStorage API?	Functionality: Returns a table storage **DB ADMIN ONLY** Description: Returns a table storage. Only returns the last collected data between start and end. Endpoint: getTableStorage API: Db2 Warehouse on Cloud v4	0	-3.41969
Db2 Warehouse on Cloud v4	159	As a DB administrator, I want to retrieve the most recent table storage information using the Db2 Warehouse on Cloud v4 API. Could you please help me construct a query to achieve this?	Functionality: Returns a table storage **DB ADMIN ONLY** Description: Returns a table storage. Only returns the last collected data between start and end. Endpoint: getTableStorage API: Db2 Warehouse on Cloud v4	0	-3.63818
Db2 Warehouse on Cloud v4	160	I want to know how to forcibly terminate a running query or statement using Db2 Warehouse on Cloud v4. This action should only be performed by a DB administrator.	Functionality: Terminates a statement **DB ADMIN ONLY** Description: Terminates a statement Endpoint: TerminateActiveStatements API: Db2 Warehouse on Cloud v4	0	-2.72036
Db2 Warehouse on Cloud v4	160	As a DB Admin, I want to know how to terminate an active statement in Db2 Warehouse on Cloud v4.	Functionality: Terminates a statement **DB ADMIN ONLY** Description: Terminates a statement Endpoint: TerminateActiveStatements API: Db2 Warehouse on Cloud v4	0	-2.61159
Db2 Warehouse on Cloud v4	160	How do I terminate an active statement in Db2 Warehouse on Cloud v4 using the provided API?	Functionality: Terminates a statement **DB ADMIN ONLY** Description: Terminates a statement Endpoint: TerminateActiveStatements API: Db2 Warehouse on Cloud v4	0	-2.79577
Db2 Warehouse on Cloud v4	160	I'd like to know how to forcibly end a running query using Db2 Warehouse on Cloud v4, as a DB administrator.	Functionality: Terminates a statement **DB ADMIN ONLY** Description: Terminates a statement Endpoint: TerminateActiveStatements API: Db2 Warehouse on Cloud v4	0	-2.73438
Db2 Warehouse on Cloud v4	160	As a DB Admin, I want to know how to terminate running statements in Db2 Warehouse on Cloud v4 to free up system resources. Could you please help me with the correct usage of the TerminateActiveStatements API to effectively handle this task?	Functionality: Terminates a statement **DB ADMIN ONLY** Description: Terminates a statement Endpoint: TerminateActiveStatements API: Db2 Warehouse on Cloud v4	0	-2.61649
Db2 Warehouse on Cloud v4	161	How do I retrieve a list of all the schemas in my Db2 Warehouse on Cloud v4 database using the API?	Functionality: Lists all schemas in the database Description: Returns a list of schemas. Endpoint: ListDatabaseSchemas API: Db2 Warehouse on Cloud v4	0	-2.19722
Db2 Warehouse on Cloud v4	161	How do I retrieve a list of all schemas in the Db2 Warehouse on Cloud v4 database?	Functionality: Lists all schemas in the database Description: Returns a list of schemas. Endpoint: ListDatabaseSchemas API: Db2 Warehouse on Cloud v4	0	-2.19355
Db2 Warehouse on Cloud v4	161	How do I retrieve a list of all schemas in a Db2 Warehouse on Cloud v4 database using the API?	Functionality: Lists all schemas in the database Description: Returns a list of schemas. Endpoint: ListDatabaseSchemas API: Db2 Warehouse on Cloud v4	0	-2.1737
Db2 Warehouse on Cloud v4	161	I want to retrieve a list of all existing schemas in my Db2 Warehouse on Cloud v4 database. Could you please show me how to do this using the API's ListDatabaseSchemas functionality?	Functionality: Lists all schemas in the database Description: Returns a list of schemas. Endpoint: ListDatabaseSchemas API: Db2 Warehouse on Cloud v4	0	-1.91775
Db2 Warehouse on Cloud v4	161	How do I retrieve a list of all schemas within my Db2 Warehouse on Cloud v4 database using the API?	Functionality: Lists all schemas in the database Description: Returns a list of schemas. Endpoint: ListDatabaseSchemas API: Db2 Warehouse on Cloud v4	0	-2.17802
Db2 Warehouse on Cloud v4	162	How do I check the status of the most recent scaling request in my Db2 Warehouse on Cloud v4 environment?	Functionality: Get the last scaling request status Description: Get the status from the last scaling request Endpoint: getLastScalingStatus API: Db2 Warehouse on Cloud v4	0	-2.0645
Db2 Warehouse on Cloud v4	162	How can I check the status of the last scaling request I made with Db2 Warehouse on Cloud v4?	Functionality: Get the last scaling request status Description: Get the status from the last scaling request Endpoint: getLastScalingStatus API: Db2 Warehouse on Cloud v4	0	-1.91367
Db2 Warehouse on Cloud v4	162	I want to check the status of the most recent scaling request I made for my Db2 Warehouse on Cloud v4 instance. How can I do that using the API?	Functionality: Get the last scaling request status Description: Get the status from the last scaling request Endpoint: getLastScalingStatus API: Db2 Warehouse on Cloud v4	0	-2.03905
Db2 Warehouse on Cloud v4	162	How do I check the status of the most recent scaling request in my Db2 Warehouse on Cloud v4 environment?	Functionality: Get the last scaling request status Description: Get the status from the last scaling request Endpoint: getLastScalingStatus API: Db2 Warehouse on Cloud v4	0	-2.0645
Db2 Warehouse on Cloud v4	162	Show me how to check the status of the most recent scaling request with Db2 Warehouse on Cloud v4.	Functionality: Get the last scaling request status Description: Get the status from the last scaling request Endpoint: getLastScalingStatus API: Db2 Warehouse on Cloud v4	0	-2.06593
Db2 Warehouse on Cloud v4	163	I'd like to learn how to drop a specific view using the Db2 Warehouse on Cloud v4 API. Could you please provide an example of the proper syntax and required parameters for a dropView request?	Functionality: Example request Description: Drop views. Endpoint: dropView API: Db2 Warehouse on Cloud v4	0	-3.06161
Db2 Warehouse on Cloud v4	163	I want to know how to drop a specific view using Db2 Warehouse on Cloud v4 API. Could you please provide an example of a query to drop a view in Db2 Warehouse on Cloud v4?	Functionality: Example request Description: Drop views. Endpoint: dropView API: Db2 Warehouse on Cloud v4	0	-3.20636
Db2 Warehouse on Cloud v4	163	How do I drop a view using the Db2 Warehouse on Cloud v4 API?	Functionality: Example request Description: Drop views. Endpoint: dropView API: Db2 Warehouse on Cloud v4	0	-3.19415
Db2 Warehouse on Cloud v4	163	I want to delete a view using Db2 Warehouse on Cloud v4. How do I format a request to drop a specific view with this API?	Functionality: Example request Description: Drop views. Endpoint: dropView API: Db2 Warehouse on Cloud v4	0	-3.16732
Db2 Warehouse on Cloud v4	163	How do I drop a view using Db2 Warehouse on Cloud v4 API?	Functionality: Example request Description: Drop views. Endpoint: dropView API: Db2 Warehouse on Cloud v4	0	-3.20647
GDPS REST API V4R6XRC	164	I'd like to retrieve the health checks information for a specific Geographic Member using the GDPS REST API V4R6XRC. Please show me how to use the 'get_health_checks_geo' endpoint to achieve this.	Functionality: Get the health checks GEOHCP member Description: The *rc* and *message* attributes are only present in **v2** version Endpoint: get_health_checks_geo API: GDPS REST API V4R6XRC	0	-2.03248
GDPS REST API V4R6XRC	164	I want to retrieve the information about the specific GeoHCP member related to a health check using the GDPS REST API V4R6XRC.	Functionality: Get the health checks GEOHCP member Description: The *rc* and *message* attributes are only present in **v2** version Endpoint: get_health_checks_geo API: GDPS REST API V4R6XRC	0	-1.71301
GDPS REST API V4R6XRC	164	How do I retrieve the health check details, including any error codes and messages, of a specific Geographic Health Check Point (GEOHCP) member with the GDPS REST API V4R6XRC?	Functionality: Get the health checks GEOHCP member Description: The *rc* and *message* attributes are only present in **v2** version Endpoint: get_health_checks_geo API: GDPS REST API V4R6XRC	0	-1.74556
GDPS REST API V4R6XRC	164	I'd like to retrieve the health check information related to a specific Geographic Health Check Point (GEOHCP) member using GDPS REST API V4R6XRC. Could you please help me with a query to get this data?	Functionality: Get the health checks GEOHCP member Description: The *rc* and *message* attributes are only present in **v2** version Endpoint: get_health_checks_geo API: GDPS REST API V4R6XRC	0	-1.66733
GDPS REST API V4R6XRC	164	I'd like to retrieve the details of a specific Geographic Health Check Point (GEOHCP) member using the GDPS REST API V4R6XRC. Please guide me through the process.	Functionality: Get the health checks GEOHCP member Description: The *rc* and *message* attributes are only present in **v2** version Endpoint: get_health_checks_geo API: GDPS REST API V4R6XRC	0	-1.84702
GDPS REST API V4R6XRC	165	I need to know how to suspend SE communication with GDPS using the GDPS REST API V4R6XRC.	Functionality: Suspend SE communication with GDPS Description: Endpoint: post_systems_supsend_console API: GDPS REST API V4R6XRC	0	-2.32283
GDPS REST API V4R6XRC	165	I want to suspend SE communication with GDPS using the GDPS REST API V4R6XRC. Can you help me construct a query to achieve this?	Functionality: Suspend SE communication with GDPS Description: Endpoint: post_systems_supsend_console API: GDPS REST API V4R6XRC	0	-2.28998
GDPS REST API V4R6XRC	165	I want to know how to suspend SE communication with GDPS using the GDPS REST API V4R6XRC.	Functionality: Suspend SE communication with GDPS Description: Endpoint: post_systems_supsend_console API: GDPS REST API V4R6XRC	0	-2.32559
GDPS REST API V4R6XRC	165	I want to suspend SE communication with GDPS using the GDPS REST API V4R6XRC. How do I make a request to do this?	Functionality: Suspend SE communication with GDPS Description: Endpoint: post_systems_supsend_console API: GDPS REST API V4R6XRC	0	-2.31188
GDPS REST API V4R6XRC	165	Please tell me how to suspend SE communication with GDPS using the GDPS REST API V4R6XRC.	Functionality: Suspend SE communication with GDPS Description: Endpoint: post_systems_supsend_console API: GDPS REST API V4R6XRC	0	-2.33421
GDPS REST API V4R6XRC	166	I'd like to retrieve the health check execution history, including the return code (*rc*) and message details, using the GDPS REST API V4R6XRC. How do I craft a request to achieve this?	Functionality: Get health check execution history Description: The *rc* and *message* attributes are only present in **v2** version Endpoint: get_health_checks_history API: GDPS REST API V4R6XRC	0	-1.21035
GDPS REST API V4R6XRC	166	I'd like to retrieve the health check execution history, including the return code (*rc*) and message details using the GDPS REST API V4R6XRC. Could you please show me how to construct the query for this task?	Functionality: Get health check execution history Description: The *rc* and *message* attributes are only present in **v2** version Endpoint: get_health_checks_history API: GDPS REST API V4R6XRC	0	-1.20891
GDPS REST API V4R6XRC	166	How do I retrieve the health check execution history, including the return code and message, using the GDPS REST API V4R6XRC (v2 version)?	Functionality: Get health check execution history Description: The *rc* and *message* attributes are only present in **v2** version Endpoint: get_health_checks_history API: GDPS REST API V4R6XRC	0	-1.09387
GDPS REST API V4R6XRC	166	I'd like to retrieve the health check execution history along with return code and message details using the GDPS REST API V4R6XRC. How can I achieve this?	Functionality: Get health check execution history Description: The *rc* and *message* attributes are only present in **v2** version Endpoint: get_health_checks_history API: GDPS REST API V4R6XRC	0	-1.27326
GDPS REST API V4R6XRC	167	I'd like to know how to retrieve the report of the most recent GDPS scripts refresh from the GEODEF dataset using the GDPS REST API V4R6XRC.	Functionality: Get the report of the last GDPS scripts refresh from the GEODEF dataset. Description: Endpoint: refresh_scripts_report API: GDPS REST API V4R6XRC	0	-1.59501
GDPS REST API V4R6XRC	167	I'd like to know how to retrieve the report of the last GDPS scripts refresh from the GEODEF dataset using the GDPS REST API V4R6XRC.	Functionality: Get the report of the last GDPS scripts refresh from the GEODEF dataset. Description: Endpoint: refresh_scripts_report API: GDPS REST API V4R6XRC	0	-1.39045
GDPS REST API V4R6XRC	167	I want to retrieve the report of the most recent GDPS scripts refresh from the GEODEF dataset using the GDPS REST API V4R6XRC. Can you please guide me on how to achieve this?	Functionality: Get the report of the last GDPS scripts refresh from the GEODEF dataset. Description: Endpoint: refresh_scripts_report API: GDPS REST API V4R6XRC	0	-1.57517
GDPS REST API V4R6XRC	167	I want to retrieve the report of the most recent GDPS scripts refresh from the GEODEF dataset using the GDPS REST API V4R6XRC.	Functionality: Get the report of the last GDPS scripts refresh from the GEODEF dataset. Description: Endpoint: refresh_scripts_report API: GDPS REST API V4R6XRC	0	-1.59848
GDPS REST API V4R6XRC	167	How do I obtain the report of the most recent GDPS script refresh from the GEODEF dataset using the GDPS REST API V4R6XRC?	Functionality: Get the report of the last GDPS scripts refresh from the GEODEF dataset. Description: Endpoint: refresh_scripts_report API: GDPS REST API V4R6XRC	0	-1.74884
GDPS REST API V4R6XRC	168	I would like to query the latest data from a specific CPC using the GDPS REST API V4R6XRC. Please provide the correct API call for this action.	Functionality: Query the specified CPC (Refresh data) Description: Endpoint: API: GDPS REST API V4R6XRC	0	-2.43107
GDPS REST API V4R6XRC	168	I'd like to query updated data for the specified CPC (Customer Protection Check) using the GDPS REST API V4R6XRC.	Functionality: Query the specified CPC (Refresh data) Description: Endpoint: API: GDPS REST API V4R6XRC	0	-2.58373
GDPS REST API V4R6XRC	168	How do I refresh data for a specific CPC using the GDPS REST API V4R6XRC?	Functionality: Query the specified CPC (Refresh data) Description: Endpoint: API: GDPS REST API V4R6XRC	0	-2.77781
GDPS REST API V4R6XRC	168	I want to refresh the data in a specific CPC (Customer Problem Catalog) entry using the GDPS REST API V4R6XRC. Could you please provide instructions on how to do this?	Functionality: Query the specified CPC (Refresh data) Description: Endpoint: API: GDPS REST API V4R6XRC	0	-3.00552
GDPS REST API V4R6XRC	168	I'd like to inquire about querying the latest data for a specific Campaign Performance Cube (CPC) using the GDPS REST API V4R6XRC.	Functionality: Query the specified CPC (Refresh data) Description: Endpoint: API: GDPS REST API V4R6XRC	0	-2.73266
IBM Cloud for VMware Solutions API	169	How do I retrieve the list of supported vSphere versions as a JSON object utilizing the IBM Cloud for VMware Solutions API?	Functionality: Get the list of supported vSphere versions as a JSON object Description: Get the list of supported vSphere versions as a JSON object, and the key name is "vsphere_versions". Endpoint: controllers.public.v2.proxy.list_vsphere_versions API: IBM Cloud for VMware Solutions API	0	-0.86784
IBM Cloud for VMware Solutions API	169	How do I retrieve the list of supported vSphere versions as a JSON object using the IBM Cloud for VMware Solutions API?	Functionality: Get the list of supported vSphere versions as a JSON object Description: Get the list of supported vSphere versions as a JSON object, and the key name is "vsphere_versions". Endpoint: controllers.public.v2.proxy.list_vsphere_versions API: IBM Cloud for VMware Solutions API	0	-0.866754
IBM Cloud for VMware Solutions API	169	How do I retrieve a list of supported vSphere versions as a JSON object using the IBM Cloud for VMware Solutions API?	Functionality: Get the list of supported vSphere versions as a JSON object Description: Get the list of supported vSphere versions as a JSON object, and the key name is "vsphere_versions". Endpoint: controllers.public.v2.proxy.list_vsphere_versions API: IBM Cloud for VMware Solutions API	0	-0.872781
IBM Cloud for VMware Solutions API	169	How do I retrieve a JSON object listing the supported vSphere versions using the IBM Cloud for VMware Solutions API?	Functionality: Get the list of supported vSphere versions as a JSON object Description: Get the list of supported vSphere versions as a JSON object, and the key name is "vsphere_versions". Endpoint: controllers.public.v2.proxy.list_vsphere_versions API: IBM Cloud for VMware Solutions API	0	-0.891063
IBM Cloud for VMware Solutions API	169	How do I retrieve the JSON object containing the list of supported vSphere versions using the IBM Cloud for VMware Solutions API?	Functionality: Get the list of supported vSphere versions as a JSON object Description: Get the list of supported vSphere versions as a JSON object, and the key name is "vsphere_versions". Endpoint: controllers.public.v2.proxy.list_vsphere_versions API: IBM Cloud for VMware Solutions API	0	-0.870504
IBM Cloud for VMware Solutions API	170	How do I cancel billing for multiple items in a VMware vSphere instance using the IBM Cloud for VMware Solutions API?	Functionality: Cancel a list of billing item IDs from a VMware vSphere instance Description: Cancel a list of billing item IDs from a VMware vSphere instance Endpoint: controllers.public.v1.proxy.cancel_vss_lic_billing_items API: IBM Cloud for VMware Solutions API	0	-1.63392
IBM Cloud for VMware Solutions API	170	I'd like to know how to cancel billing for a list of items in a VMware vSphere instance using the IBM Cloud for VMware Solutions API. Please provide the required billing item IDs to cancel.	Functionality: Cancel a list of billing item IDs from a VMware vSphere instance Description: Cancel a list of billing item IDs from a VMware vSphere instance Endpoint: controllers.public.v1.proxy.cancel_vss_lic_billing_items API: IBM Cloud for VMware Solutions API	0	-1.56319
IBM Cloud for VMware Solutions API	170	How do I cancel billing for a list of item IDs associated with a VMware vSphere instance using the IBM Cloud for VMware Solutions API?	Functionality: Cancel a list of billing item IDs from a VMware vSphere instance Description: Cancel a list of billing item IDs from a VMware vSphere instance Endpoint: controllers.public.v1.proxy.cancel_vss_lic_billing_items API: IBM Cloud for VMware Solutions API	0	-1.57637
IBM Cloud for VMware Solutions API	170	How do I cancel billing for a list of items in my VMware vSphere instance using the IBM Cloud for VMware Solutions API?	Functionality: Cancel a list of billing item IDs from a VMware vSphere instance Description: Cancel a list of billing item IDs from a VMware vSphere instance Endpoint: controllers.public.v1.proxy.cancel_vss_lic_billing_items API: IBM Cloud for VMware Solutions API	0	-1.60422
IBM Cloud for VMware Solutions API	171	How do I remove a stand-alone KMIP adapter service instance using the IBM Cloud for VMware Solutions API? Please provide an example request for this operation.	Functionality: Example request for KMIP adapter service removal Description: Deletes the stand-alone service instance specified by service instance ID Endpoint: controllers.public.v1.proxy.remove_standalone_service API: IBM Cloud for VMware Solutions API	0	-2.2628
IBM Cloud for VMware Solutions API	171	I'd like to know how to remove a specific stand-alone KMIP adapter service instance from IBM Cloud for VMware Solutions using its unique ID.	Functionality: Example request for KMIP adapter service removal Description: Deletes the stand-alone service instance specified by service instance ID Endpoint: controllers.public.v1.proxy.remove_standalone_service API: IBM Cloud for VMware Solutions API	0	-2.22322
IBM Cloud for VMware Solutions API	171	How do I remove a stand-alone KMIP adapter service instance using its ID with the IBM Cloud for VMware Solutions API?	Functionality: Example request for KMIP adapter service removal Description: Deletes the stand-alone service instance specified by service instance ID Endpoint: controllers.public.v1.proxy.remove_standalone_service API: IBM Cloud for VMware Solutions API	0	-2.17028
IBM Cloud for VMware Solutions API	171	How do I remove a specific KMIP adapter service instance using the IBM Cloud for VMware Solutions API?	Functionality: Example request for KMIP adapter service removal Description: Deletes the stand-alone service instance specified by service instance ID Endpoint: controllers.public.v1.proxy.remove_standalone_service API: IBM Cloud for VMware Solutions API	0	-2.4456
IBM Cloud for VMware Solutions API	171	How can I remove a KMIP adapter service instance using the IBM Cloud for VMware Solutions API, given its unique ID?	Functionality: Example request for KMIP adapter service removal Description: Deletes the stand-alone service instance specified by service instance ID Endpoint: controllers.public.v1.proxy.remove_standalone_service API: IBM Cloud for VMware Solutions API	0	-2.45864
IBM Cloud for VMware Solutions API	172	How do I retrieve the list of supported disk types as a JSON object using the IBM Cloud for VMware Solutions API?	Functionality: Get the list of supported disk types as a JSON object Description: Get the list of supported disk types as a JSON object, and the key name is "disk_types". Endpoint: controllers.public.v2.proxy.list_disk_types API: IBM Cloud for VMware Solutions API	0	-0.921537
IBM Cloud for VMware Solutions API	172	How do I retrieve the list of supported disk types as a JSON object using the IBM Cloud for VMware Solutions API?	Functionality: Get the list of supported disk types as a JSON object Description: Get the list of supported disk types as a JSON object, and the key name is "disk_types". Endpoint: controllers.public.v2.proxy.list_disk_types API: IBM Cloud for VMware Solutions API	0	-0.921537
IBM Cloud for VMware Solutions API	172	How do I retrieve a list of all the supported disk types as a JSON object using the IBM Cloud for VMware Solutions API?	Functionality: Get the list of supported disk types as a JSON object Description: Get the list of supported disk types as a JSON object, and the key name is "disk_types". Endpoint: controllers.public.v2.proxy.list_disk_types API: IBM Cloud for VMware Solutions API	0	-0.939351
IBM Cloud for VMware Solutions API	172	How do I retrieve the list of supported disk types as a JSON object using the IBM Cloud for VMware Solutions API?	Functionality: Get the list of supported disk types as a JSON object Description: Get the list of supported disk types as a JSON object, and the key name is "disk_types". Endpoint: controllers.public.v2.proxy.list_disk_types API: IBM Cloud for VMware Solutions API	0	-0.921537
IBM Cloud for VMware Solutions API	172	How do I retrieve the list of supported disk types as a JSON object with the IBM Cloud for VMware Solutions API?	Functionality: Get the list of supported disk types as a JSON object Description: Get the list of supported disk types as a JSON object, and the key name is "disk_types". Endpoint: controllers.public.v2.proxy.list_disk_types API: IBM Cloud for VMware Solutions API	0	-0.916583
Kubernetes Service API	173	I'd like to update the parameters of an existing Satellite storage configuration using the Kubernetes Service API. Please guide me on how to do that effectively.	Functionality: Update a Satellite storage configuration. Description: Update an existing Satellite storage configuration. If a Satellite storage configuration is already assigned, only the parameters that are marked as `mutable` can be updated. Endpoint: updateStorageConfigurationByController API: Kubernetes Service API	0	-1.86985
Kubernetes Service API	173	I'd like to update the parameters of an existing Satellite storage configuration using the Kubernetes Service API.Which mutable configuration parameters can I update with this API?	Functionality: Update a Satellite storage configuration. Description: Update an existing Satellite storage configuration. If a Satellite storage configuration is already assigned, only the parameters that are marked as `mutable` can be updated. Endpoint: updateStorageConfigurationByController API: Kubernetes Service API	0	-2.01469
Kubernetes Service API	173	I'd like to update the parameters of an existing Satellite storage configuration using the Kubernetes Service API. Specifically, I wish to change the `volumeSize` or other mutable configuration settings. Please guide me on how to effectively implement this using the provided 'updateStorageConfigurationByController' API.	Functionality: Update a Satellite storage configuration. Description: Update an existing Satellite storage configuration. If a Satellite storage configuration is already assigned, only the parameters that are marked as `mutable` can be updated. Endpoint: updateStorageConfigurationByController API: Kubernetes Service API	0	-1.52971
Kubernetes Service API	173	I'd like to update an existing Satellite storage configuration using the Kubernetes Service API. Which mutable parameters can I modify, and how do I construct the query for this update?	Functionality: Update a Satellite storage configuration. Description: Update an existing Satellite storage configuration. If a Satellite storage configuration is already assigned, only the parameters that are marked as `mutable` can be updated. Endpoint: updateStorageConfigurationByController API: Kubernetes Service API	0	-1.84525
Kubernetes Service API	173	I'd like to update an existing Satellite storage configuration with the Kubernetes Service API. Which mutable parameters can I change for this configuration?	Functionality: Update a Satellite storage configuration. Description: Update an existing Satellite storage configuration. If a Satellite storage configuration is already assigned, only the parameters that are marked as `mutable` can be updated. Endpoint: updateStorageConfigurationByController API: Kubernetes Service API	0	-1.87585
Kubernetes Service API	174	I'd like to create a filter configuration to narrow down the logs that are being forwarded by my Kubernetes logging configuration to specific sources using the Kubernetes Service API.	Functionality: Create a logging filter configuration. Description: Start filtering logs that are forwarded by your logging configuration from the given sources based on one or more selectors. Endpoint: CreateFilterConfig API: Kubernetes Service API	0	-2.41285
Kubernetes Service API	174	I'd like to create a logging filter configuration to narrow down the logs I receive based on specific sources using the Kubernetes Service API.	Functionality: Create a logging filter configuration. Description: Start filtering logs that are forwarded by your logging configuration from the given sources based on one or more selectors. Endpoint: CreateFilterConfig API: Kubernetes Service API	0	-2.63813
Kubernetes Service API	174	I want to create a logging filter configuration and start filtering logs based on specific selectors with the Kubernetes Service API.	Functionality: Create a logging filter configuration. Description: Start filtering logs that are forwarded by your logging configuration from the given sources based on one or more selectors. Endpoint: CreateFilterConfig API: Kubernetes Service API	0	-2.6792
Kubernetes Service API	174	I'd like to create a logging filter configuration with the Kubernetes Service API to start filtering logs from specific sources based on selectors.	Functionality: Create a logging filter configuration. Description: Start filtering logs that are forwarded by your logging configuration from the given sources based on one or more selectors. Endpoint: CreateFilterConfig API: Kubernetes Service API	0	-2.4281
Kubernetes Service API	174	I'd like to know how to create a logging filter configuration and start filtering logs with specific selectors using the Kubernetes Service API.	Functionality: Create a logging filter configuration. Description: Start filtering logs that are forwarded by your logging configuration from the given sources based on one or more selectors. Endpoint: CreateFilterConfig API: Kubernetes Service API	0	-2.74391
Kubernetes Service API	175	I'd like to create a new Kubernetes cluster within my IBM Cloud Virtual Private Cloud using the Kubernetes Service API. This API allows me to create a secure cluster with enhanced network isolation. To get started, I'll ensure I have the necessary administrative permissions in my IBM Cloud account and access to the underlying infrastructure provider. Then, I'll make use of the 'vpcCreateCluster' …	Functionality: Create a VPC cluster. Description: Create a cluster in a Virtual Private Cloud (VPC) that you have access to. Note: This API method requires Administrator platform role for IBM Cloud Kubernetes Service at the account level, as well as access to several other services such as the underlying infrastructure provider. For more information, see 'https://ibm.biz/cluster-perms'. Endpoint:…	0	-2.26659
Kubernetes Service API	175	I'd like to create a Kubernetes cluster within my Virtual Private Cloud (VPC) using the Kubernetes Service API. Please guide me through the process, ensuring I have the necessary administrator permissions and access to the underlying infrastructure provider.	Functionality: Create a VPC cluster. Description: Create a cluster in a Virtual Private Cloud (VPC) that you have access to. Note: This API method requires Administrator platform role for IBM Cloud Kubernetes Service at the account level, as well as access to several other services such as the underlying infrastructure provider. For more information, see 'https://ibm.biz/cluster-perms'. Endpoint:…	0	-2.26923
Kubernetes Service API	175	I'd like to create a new Kubernetes cluster within my Virtual Private Cloud using the IBM Cloud Kubernetes Service API. Please guide me through the process to ensure I have the necessary administrative permissions and access to the required services before executing the `vpcCreateCluster` API call.	Functionality: Create a VPC cluster. Description: Create a cluster in a Virtual Private Cloud (VPC) that you have access to. Note: This API method requires Administrator platform role for IBM Cloud Kubernetes Service at the account level, as well as access to several other services such as the underlying infrastructure provider. For more information, see 'https://ibm.biz/cluster-perms'. Endpoint:…	0	-2.46701
Kubernetes Service API	175	I'd like to create a new Kubernetes cluster inside a Virtual Private Cloud (VPC) using the IBM Cloud Kubernetes Service API. Please guide me through the process to ensure I have the necessary administrator role and access to all required services before executing the `vpcCreateCluster` API call.	Functionality: Create a VPC cluster. Description: Create a cluster in a Virtual Private Cloud (VPC) that you have access to. Note: This API method requires Administrator platform role for IBM Cloud Kubernetes Service at the account level, as well as access to several other services such as the underlying infrastructure provider. For more information, see 'https://ibm.biz/cluster-perms'. Endpoint:…	0	-2.42377
Kubernetes Service API	175	I'd like to create a new Kubernetes cluster within my Virtual Private Cloud (VPC) using the IBM Cloud Kubernetes Service API. This API method, named vpcCreateCluster, requires the Administrator platform role for IBM Cloud Kubernetes Service at the account level and access to related services. If you could guide me through the process of creating a cluster in a specific VPC with this API, I'd appr…	Functionality: Create a VPC cluster. Description: Create a cluster in a Virtual Private Cloud (VPC) that you have access to. Note: This API method requires Administrator platform role for IBM Cloud Kubernetes Service at the account level, as well as access to several other services such as the underlying infrastructure provider. For more information, see 'https://ibm.biz/cluster-perms'. Endpoint:…	0	-1.94863
Kubernetes Service API	176	I'd like to know how to list the available zones (data centers) where I can create a new Kubernetes cluster using the Kubernetes Service API.	Functionality: List available zones (data centers). Description: List available zones (data centers) where you can create a cluster. Endpoint: GetZones API: Kubernetes Service API	0	-1.97248
Kubernetes Service API	176	How do I find out which data centers I can use to create a new cluster with the Kubernetes Service API?	Functionality: List available zones (data centers). Description: List available zones (data centers) where you can create a cluster. Endpoint: GetZones API: Kubernetes Service API	0	-1.93894
Kubernetes Service API	176	I want to know which data centers I can use to create a new cluster utilizing the Kubernetes Service API. Please help me list the available zones (data centers) with this API.	Functionality: List available zones (data centers). Description: List available zones (data centers) where you can create a cluster. Endpoint: GetZones API: Kubernetes Service API	0	-1.72976
Kubernetes Service API	176	I'd like to know how to list the available zones (data centers) where I can create a new Kubernetes cluster using the Kubernetes Service API.	Functionality: List available zones (data centers). Description: List available zones (data centers) where you can create a cluster. Endpoint: GetZones API: Kubernetes Service API	0	-1.97248
Kubernetes Service API	176	I'd like to know how to retrieve a list of available zones (data centers) where I can create a Kubernetes cluster using the Kubernetes Service API.	Functionality: List available zones (data centers). Description: List available zones (data centers) where you can create a cluster. Endpoint: GetZones API: Kubernetes Service API	0	-1.9617
Kubernetes Service API	177	I want to know how to view IBM Cloud Secrets Manager instances registered to my cluster with the Kubernetes Service API.	Functionality: View IBM Cloud Secrets Manager instances registered to the cluster. Description: View IBM Cloud Secrets Manager instances registered to the cluster. Endpoint: GetSecretInstances API: Kubernetes Service API	0	-1.56154
Kubernetes Service API	177	How do I retrieve the list of IBM Cloud Secrets Manager instances associated with my Kubernetes cluster using the Kubernetes Service API?	Functionality: View IBM Cloud Secrets Manager instances registered to the cluster. Description: View IBM Cloud Secrets Manager instances registered to the cluster. Endpoint: GetSecretInstances API: Kubernetes Service API	0	-2.35579
Kubernetes Service API	177	I would like to know how to view the IBM Cloud Secrets Manager instances registered to my Kubernetes cluster using the Kubernetes Service API.	Functionality: View IBM Cloud Secrets Manager instances registered to the cluster. Description: View IBM Cloud Secrets Manager instances registered to the cluster. Endpoint: GetSecretInstances API: Kubernetes Service API	0	-1.77422
Kubernetes Service API	177	I'd like to know how to view the IBM Cloud Secrets Manager instances registered to my current Kubernetes cluster using the Kubernetes Service API.	Functionality: View IBM Cloud Secrets Manager instances registered to the cluster. Description: View IBM Cloud Secrets Manager instances registered to the cluster. Endpoint: GetSecretInstances API: Kubernetes Service API	0	-1.80066
Kubernetes Service API	177	I'd like to know how to view the IBM Cloud Secrets Manager instances that are registered to my cluster using the Kubernetes Service API.	Functionality: View IBM Cloud Secrets Manager instances registered to the cluster. Description: View IBM Cloud Secrets Manager instances registered to the cluster. Endpoint: GetSecretInstances API: Kubernetes Service API	0	-1.63271
Kubernetes Service API	178	I'd like to know how to view the quota for Kubernetes Service resources per region, including clusters and worker nodes, using the Kubernetes Service API.	Functionality: View the quota for resources per region in the account. Description: View the quota for IBM Cloud Kubernetes Service resources such as clusters and worker nodes. The quota is per region and applies across resource groups in the account. To increase your quota, contact IBM Support and include the new quota limit that you want for the region, resource, and infrastructure provider suc…	0	-2.08271
Kubernetes Service API	178	I'd like to know how to check the resource quotas for my IBM Cloud Kubernetes Service in a specific region using the Kubernetes Service API.	Functionality: View the quota for resources per region in the account. Description: View the quota for IBM Cloud Kubernetes Service resources such as clusters and worker nodes. The quota is per region and applies across resource groups in the account. To increase your quota, contact IBM Support and include the new quota limit that you want for the region, resource, and infrastructure provider suc…	0	-2.46431
Kubernetes Service API	178	I'd like to know how to view the resource quota for IBM Cloud Kubernetes Service per region with the Kubernetes Service API. This includes the quota for clusters and worker nodes. If I need to increase the quota, I should contact IBM Support, providing the desired new limit for the region, resource, and infrastructure provider (classic or VPC).	Functionality: View the quota for resources per region in the account. Description: View the quota for IBM Cloud Kubernetes Service resources such as clusters and worker nodes. The quota is per region and applies across resource groups in the account. To increase your quota, contact IBM Support and include the new quota limit that you want for the region, resource, and infrastructure provider suc…	0	-1.70885
Kubernetes Service API	178	I'd like to know how to view the resource quota for IBM Cloud Kubernetes Service in a specific region with the Kubernetes Service API. This includes the limits for clusters and worker nodes. Please keep in mind that I can contact IBM Support to request an increase in quota if needed.	Functionality: View the quota for resources per region in the account. Description: View the quota for IBM Cloud Kubernetes Service resources such as clusters and worker nodes. The quota is per region and applies across resource groups in the account. To increase your quota, contact IBM Support and include the new quota limit that you want for the region, resource, and infrastructure provider suc…	0	-2.16215
Kubernetes Service API	178	I want to know how to view the quota for IBM Cloud Kubernetes Service resources, such as clusters and worker nodes, per region in my account using the Kubernetes Service API.	Functionality: View the quota for resources per region in the account. Description: View the quota for IBM Cloud Kubernetes Service resources such as clusters and worker nodes. The quota is per region and applies across resource groups in the account. To increase your quota, contact IBM Support and include the new quota limit that you want for the region, resource, and infrastructure provider suc…	0	-1.91823
Kubernetes Service API	179	I want to create an Ingress secret using a secret stored in IBM Cloud Secrets Manager with the Kubernetes Service API. How can I effectively accomplish this task?	Functionality: Create an Ingress secret with a secret stored in IBM Cloud Secrets Manager. Description: Create an Ingress secret with a secret stored in IBM Cloud Secrets Manager. Endpoint: CreateSecret API: Kubernetes Service API	0	-1.37687
Kubernetes Service API	179	I want to create an Ingress secret in Kubernetes using a secret stored in IBM Cloud Secrets Manager. How can I achieve this with the Kubernetes Service API?	Functionality: Create an Ingress secret with a secret stored in IBM Cloud Secrets Manager. Description: Create an Ingress secret with a secret stored in IBM Cloud Secrets Manager. Endpoint: CreateSecret API: Kubernetes Service API	0	-1.36805
Kubernetes Service API	179	I'd like to create an Ingress secret in Kubernetes using a secret that I've stored in IBM Cloud Secrets Manager. How do I achieve this with the Kubernetes Service API?	Functionality: Create an Ingress secret with a secret stored in IBM Cloud Secrets Manager. Description: Create an Ingress secret with a secret stored in IBM Cloud Secrets Manager. Endpoint: CreateSecret API: Kubernetes Service API	0	-1.3714
Kubernetes Service API	179	I want to create an Ingress secret using a secret stored in IBM Cloud Secrets Manager with the Kubernetes Service API. How can I achieve that?	Functionality: Create an Ingress secret with a secret stored in IBM Cloud Secrets Manager. Description: Create an Ingress secret with a secret stored in IBM Cloud Secrets Manager. Endpoint: CreateSecret API: Kubernetes Service API	0	-1.38854
Kubernetes Service API	179	I want to create an Ingress secret using a secret stored in IBM Cloud Secrets Manager with the Kubernetes Service API. How do I achieve that?	Functionality: Create an Ingress secret with a secret stored in IBM Cloud Secrets Manager. Description: Create an Ingress secret with a secret stored in IBM Cloud Secrets Manager. Endpoint: CreateSecret API: Kubernetes Service API	0	-1.3859
Kubernetes Service API	180	I want to check the VLAN spanning status for my IBM Cloud Infrastructure (SoftLayer) account using the Kubernetes Service API.	Functionality: View the VLAN spanning status. Description: View the VLAN spanning status for an IBM Cloud Infrastructure (SoftLayer) account. VLAN spanning enables all devices on an account to communicate with each other by means of the private network, regardless of its assigned VLAN. Endpoint: GetVlanSpanning API: Kubernetes Service API	0	-1.78249
Kubernetes Service API	180	I want to check the VLAN spanning status for my IBM Cloud Infrastructure (SoftLayer) account using the Kubernetes Service API.	Functionality: View the VLAN spanning status. Description: View the VLAN spanning status for an IBM Cloud Infrastructure (SoftLayer) account. VLAN spanning enables all devices on an account to communicate with each other by means of the private network, regardless of its assigned VLAN. Endpoint: GetVlanSpanning API: Kubernetes Service API	0	-1.78249
Kubernetes Service API	180	I'd like to know how to check the VLAN spanning status for my IBM Cloud Infrastructure account using the Kubernetes Service API.	Functionality: View the VLAN spanning status. Description: View the VLAN spanning status for an IBM Cloud Infrastructure (SoftLayer) account. VLAN spanning enables all devices on an account to communicate with each other by means of the private network, regardless of its assigned VLAN. Endpoint: GetVlanSpanning API: Kubernetes Service API	0	-1.90391
Kubernetes Service API	180	I want to check the VLAN spanning status of my IBM Cloud Infrastructure (SoftLayer) account using the Kubernetes Service API.	Functionality: View the VLAN spanning status. Description: View the VLAN spanning status for an IBM Cloud Infrastructure (SoftLayer) account. VLAN spanning enables all devices on an account to communicate with each other by means of the private network, regardless of its assigned VLAN. Endpoint: GetVlanSpanning API: Kubernetes Service API	0	-1.81131
Kubernetes Service API	180	I'd like to know how to check the VLAN spanning status for my IBM Cloud Infrastructure (SoftLayer) account using the Kubernetes Service API.	Functionality: View the VLAN spanning status. Description: View the VLAN spanning status for an IBM Cloud Infrastructure (SoftLayer) account. VLAN spanning enables all devices on an account to communicate with each other by means of the private network, regardless of its assigned VLAN. Endpoint: GetVlanSpanning API: Kubernetes Service API	0	-1.78185
Kubernetes Service API	181	I would like to learn how to disable image security enforcement for a Kubernetes cluster using the Kubernetes Service API.	Functionality: Description: Disable image security enforcement for a cluster Endpoint: V2DisableImageSecurity API: Kubernetes Service API	0	-3.16578
Kubernetes Service API	181	I'd like to know how to disable image security enforcement for a Kubernetes cluster using the Kubernetes Service API.	Functionality: Description: Disable image security enforcement for a cluster Endpoint: V2DisableImageSecurity API: Kubernetes Service API	0	-3.21123
Kubernetes Service API	181	I want to disable image security enforcement for my Kubernetes cluster using the Kubernetes Service API. How do I create a request with the V2DisableImageSecurity endpoint to accomplish this task?	Functionality: Description: Disable image security enforcement for a cluster Endpoint: V2DisableImageSecurity API: Kubernetes Service API	0	-2.51441
Kubernetes Service API	181	I'd like to disable image security enforcement for my Kubernetes cluster using the Kubernetes Service API. How can I achieve this with a specific query?	Functionality: Description: Disable image security enforcement for a cluster Endpoint: V2DisableImageSecurity API: Kubernetes Service API	0	-3.17647
Kubernetes Service API	181	I'd like to learn how to disable image security enforcement for a Kubernetes cluster using the Kubernetes Service API.	Functionality: Description: Disable image security enforcement for a cluster Endpoint: V2DisableImageSecurity API: Kubernetes Service API	0	-3.19353
Kubernetes Service API	182	I need to enable the subnet allowlist for a cluster's private service endpoint using the Kubernetes Service API. Once enabled, I can add specific subnets to the allowlist, ensuring that only requests originating from those subnets are permitted through the private service endpoint.	Functionality: Enable a subnet allowlist for a cluster's private service endpoint. Description: Enable the subnet allowlist feature for a cluster's private service endpoint. After you enable this feature, you can use the `PATCH /v1/acl/{idOrName}/add` API to add subnets to the allowlist for this cluster's private service endpoint. Only authorized requests to your cluster master that originate fro…	0	-1.64026
Kubernetes Service API	182	I want to secure access to my cluster's private service endpoint by enabling the subnet allowlist feature using the Kubernetes Service API. Could you please guide me on how to enable the subnet allowlist for this cluster's private service endpoint?	Functionality: Enable a subnet allowlist for a cluster's private service endpoint. Description: Enable the subnet allowlist feature for a cluster's private service endpoint. After you enable this feature, you can use the `PATCH /v1/acl/{idOrName}/add` API to add subnets to the allowlist for this cluster's private service endpoint. Only authorized requests to your cluster master that originate fro…	0	-1.64772
Kubernetes Service API	182	I'd like to enable the subnet allowlist feature for my cluster's private service endpoint using the Kubernetes Service API to ensure that only authorized requests originate from specific subnets.	Functionality: Enable a subnet allowlist for a cluster's private service endpoint. Description: Enable the subnet allowlist feature for a cluster's private service endpoint. After you enable this feature, you can use the `PATCH /v1/acl/{idOrName}/add` API to add subnets to the allowlist for this cluster's private service endpoint. Only authorized requests to your cluster master that originate fro…	0	-1.63383
Kubernetes Service API	182	I'd like to know how to enable the subnet allowlist for a cluster's private service endpoint using the Kubernetes Service API. After enabling this feature, I can manage the subnet allowlist by adding specific subnets via the `PATCH /v1/acl/{idOrName}/add` API. This ensures that only authorized requests to my cluster master that originate from specific subnets are allowed through the cluster's pri…	Functionality: Enable a subnet allowlist for a cluster's private service endpoint. Description: Enable the subnet allowlist feature for a cluster's private service endpoint. After you enable this feature, you can use the `PATCH /v1/acl/{idOrName}/add` API to add subnets to the allowlist for this cluster's private service endpoint. Only authorized requests to your cluster master that originate fro…	0	-1.08399
Kubernetes Service API	182	I'd like to know how to enable the subnet allowlist for a private service endpoint of a Kubernetes cluster using the Kubernetes Service API. Once enabled, I can manage and add specific subnets to the allowlist to control access to the cluster.	Functionality: Enable a subnet allowlist for a cluster's private service endpoint. Description: Enable the subnet allowlist feature for a cluster's private service endpoint. After you enable this feature, you can use the `PATCH /v1/acl/{idOrName}/add` API to add subnets to the allowlist for this cluster's private service endpoint. Only authorized requests to your cluster master that originate fro…	0	-1.7635
Kubernetes Service API	183	I want to know how to list the worker pools in a Kubernetes cluster using the Kubernetes Service API.	Functionality: List the worker pools in a cluster. Description: Endpoint: getWorkerPools API: Kubernetes Service API	0	-2.21989
Kubernetes Service API	183	I'd like to know how to list the worker pools in my Kubernetes cluster using the Kubernetes Service API.	Functionality: List the worker pools in a cluster. Description: Endpoint: getWorkerPools API: Kubernetes Service API	0	-2.18825
Kubernetes Service API	183	I'd like to know how to list the worker pools in a Kubernetes cluster using the Kubernetes Service API.	Functionality: List the worker pools in a cluster. Description: Endpoint: getWorkerPools API: Kubernetes Service API	0	-2.27779
Kubernetes Service API	183	I'd like to know how to list the existing worker pools in a Kubernetes cluster using the Kubernetes Service API.	Functionality: List the worker pools in a cluster. Description: Endpoint: getWorkerPools API: Kubernetes Service API	0	-2.31228
Kubernetes Service API	183	I'd like to know how to list the worker pools within a Kubernetes cluster using the Kubernetes Service API.	Functionality: List the worker pools in a cluster. Description: Endpoint: getWorkerPools API: Kubernetes Service API	0	-2.26564
Kubernetes Service API	184	I'd like to retrieve a list of all hosts present in my IBM Cloud Satellite location using the Kubernetes Service API. Could you please provide the steps or query I should use to achieve this?	Functionality: List the hosts in your IBM Cloud Satellite location. Description: List the hosts in your IBM Cloud Satellite location. Endpoint: GetSatelliteHosts API: Kubernetes Service API	0	-1.62817
Kubernetes Service API	184	I'd like to know how to list the hosts in my IBM Cloud Satellite location using the Kubernetes Service API.	Functionality: List the hosts in your IBM Cloud Satellite location. Description: List the hosts in your IBM Cloud Satellite location. Endpoint: GetSatelliteHosts API: Kubernetes Service API	0	-1.38835
Kubernetes Service API	184	I want to know how to list the hosts that are part of my IBM Cloud Satellite location using the Kubernetes Service API.	Functionality: List the hosts in your IBM Cloud Satellite location. Description: List the hosts in your IBM Cloud Satellite location. Endpoint: GetSatelliteHosts API: Kubernetes Service API	0	-1.4071
Kubernetes Service API	184	How do I retrieve a list of hosts in my IBM Cloud Satellite location using the Kubernetes Service API?	Functionality: List the hosts in your IBM Cloud Satellite location. Description: List the hosts in your IBM Cloud Satellite location. Endpoint: GetSatelliteHosts API: Kubernetes Service API	0	-1.54073
[truncated: 729 more rows]

## Sheet: inst_pattern_analysis
api_name	group_id	candidate	input_text	gen_tokens_mean	input_tokens_mean (itm)	human_feedback	human_feedback_memo	pattern	human_feedback_2
[truncated: 1,644 more rows]
