# Supplementary material
Source: ML conference proceedings conference paper supplement (https://openreview.net/forum?id=f7O3hITh5s)

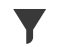

Filter

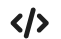

Rule-based, template-based, REGEX

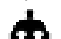

LLM (Mistral-7B-Instruct-v0.2)

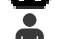

Human

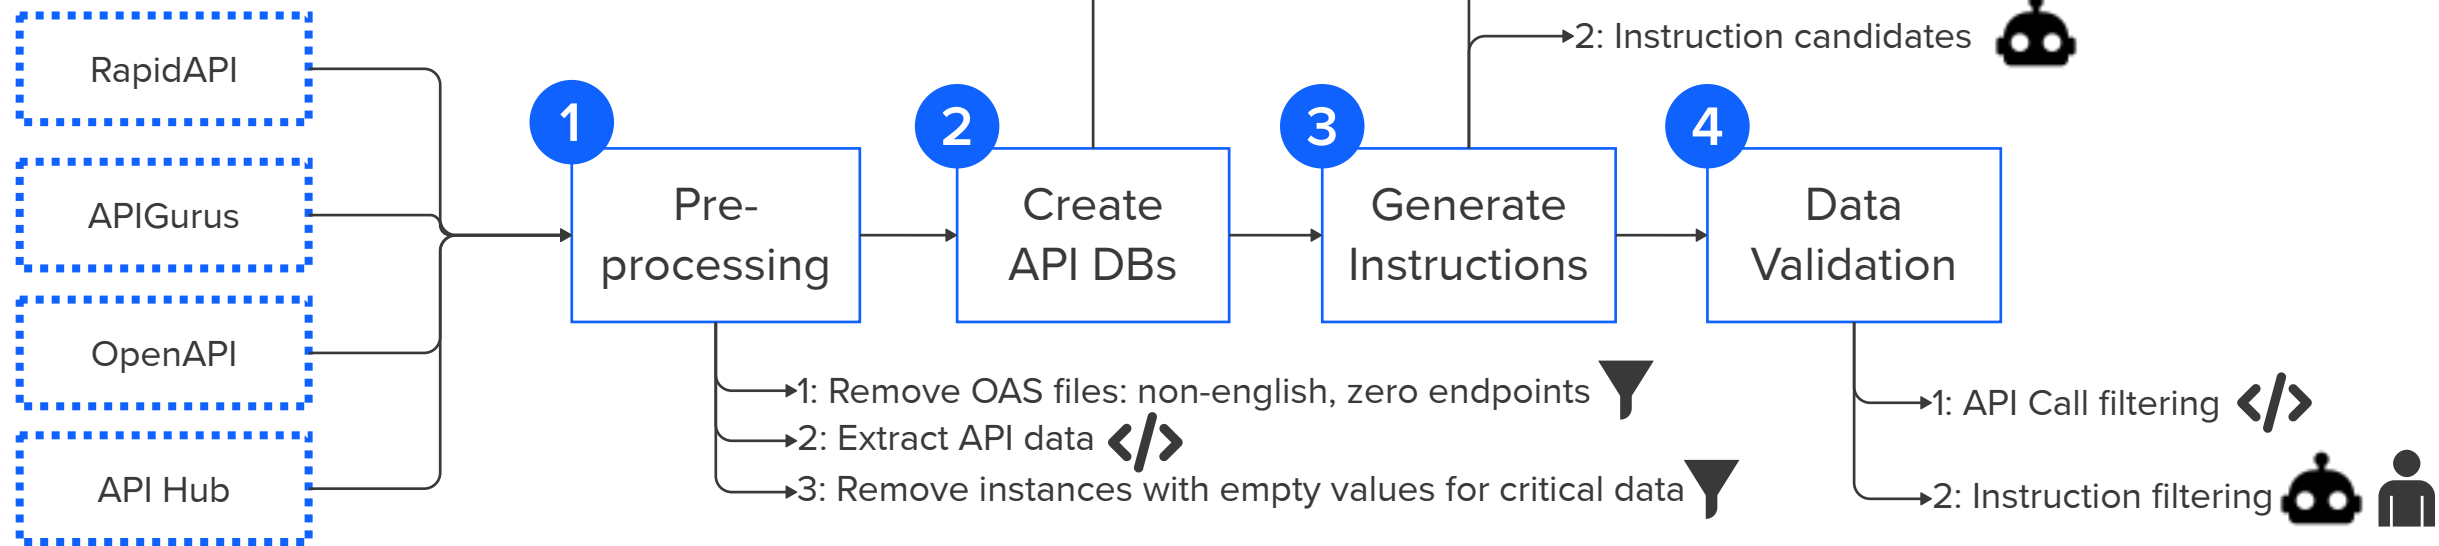

Supplement: supplementary_material [file attachment]
